# Supplementary material
Source: publisher figshare collection journal article supplement (https://acs.figshare.com/ndownloader/files/4854598)
Supplement: Supplementary file 1 [file 4854598]

 
data_L1 
 
_audit_creation_method            SHELXL-97 
_chemical_name_systematic 
; 
 ? 
; 
_chemical_name_common             ? 
_chemical_melting_point           ? 
_chemical_formula_moiety          ? 
_chemical_formula_sum 
 'C19 H29 N5 O' 
_chemical_formula_weight          343.47 
 
loop_ 
 _atom_type_symbol 
 _atom_type_description 
 _atom_type_scat_dispersion_real 
 _atom_type_scat_dispersion_imag 
 _atom_type_scat_source 
 'C'  'C'   0.0033   0.0016 
 'International Tables Vol C Tables 4.2.6.8 and 6.1.1.4' 
 'H'  'H'   0.0000   0.0000 
 'International Tables Vol C Tables 4.2.6.8 and 6.1.1.4' 
 'N'  'N'   0.0061   0.0033 
 'International Tables Vol C Tables 4.2.6.8 and 6.1.1.4' 
 'O'  'O'   0.0106   0.0060 
 'International Tables Vol C Tables 4.2.6.8 and 6.1.1.4' 
 
_symmetry_cell_setting            'Monoclinic' 
_symmetry_space_group_name_H-M    'P2(1)/c' 
 
loop_ 
 _symmetry_equiv_pos_as_xyz 
 'x, y, z' 
 '-x, y+1/2, -z+1/2' 
 '-x, -y, -z' 
 'x, -y-1/2, z-1/2' 
 
_cell_length_a                    9.3538(15) 
_cell_length_b                    23.463(4) 
_cell_length_c                    8.9193(15) 
_cell_angle_alpha                 90.00 
_cell_angle_beta                  98.061(4) 
_cell_angle_gamma                 90.00 
_cell_volume                      1938.1(5) 
_cell_formula_units_Z             4 
_cell_measurement_temperature     150(2) 
_cell_measurement_reflns_used     7884 
_cell_measurement_theta_min       2.20 
_cell_measurement_theta_max       24.89 
 
_exptl_crystal_description        'BLOCK' 
_exptl_crystal_colour             'yellowish white' 
_exptl_crystal_size_max           0.26 
_exptl_crystal_size_mid           0.16 
_exptl_crystal_size_min           0.12 
_exptl_crystal_density_meas       ? 
_exptl_crystal_density_diffrn     1.177 
_exptl_crystal_density_method     'not measured' 
_exptl_crystal_F_000              744 
_exptl_absorpt_coefficient_mu     0.076 
_exptl_absorpt_correction_type    'MULTI-SCAN' 
_exptl_absorpt_correction_T_min   0.9806 
_exptl_absorpt_correction_T_max   0.9910 
_exptl_absorpt_process_details    'SADABS'  
 
_exptl_special_details 
; 
 ? 
; 
 
_diffrn_ambient_temperature       150(2) 
_diffrn_radiation_wavelength      0.71073 
_diffrn_radiation_type            MoK\a 
_diffrn_radiation_source          'fine-focus sealed tube' 
_diffrn_radiation_monochromator   graphite 
_diffrn_measurement_device_type   'Bruker APEX-II CCD' 
_diffrn_measurement_method        '\f and \w scans'  
_diffrn_detector_area_resol_mean  ? 
_diffrn_reflns_number             22811 
_diffrn_reflns_av_R_equivalents   0.0310 
_diffrn_reflns_av_sigmaI/netI     0.0182 
_diffrn_reflns_limit_h_min        -11 
_diffrn_reflns_limit_h_max        11 
_diffrn_reflns_limit_k_min        -27 
_diffrn_reflns_limit_k_max        27 
_diffrn_reflns_limit_l_min        -10 
_diffrn_reflns_limit_l_max        10 
_diffrn_reflns_theta_min          1.74 
_diffrn_reflns_theta_max          25.00 
_reflns_number_total              3417 
_reflns_number_gt                 2828 
_reflns_threshold_expression      >2sigma(I) 
 
_computing_data_collection        'Bruker APEX2' 
_computing_cell_refinement        'Bruker SAINT' 
_computing_data_reduction         'Bruker SAINT' 
_computing_structure_solution     'SHELXS-97 (Sheldrick, 2008)' 
_computing_structure_refinement   'SHELXL-97 (Sheldrick, 2008)' 
_computing_molecular_graphics     'MERCURY 3.2' 
_computing_publication_material   'ORTEP 3V.2'  
 
_refine_special_details 
; 
 Refinement of F^2^ against ALL reflections.  The weighted R-factor wR and 
 goodness of fit S are based on F^2^, conventional R-factors R are based 
 on F, with F set to zero for negative F^2^. The threshold expression of 
 F^2^ > 2sigma(F^2^) is used only for calculating R-factors(gt) etc. and is 
 not relevant to the choice of reflections for refinement.  R-factors based 
 on F^2^ are statistically about twice as large as those based on F, and R- 
 factors based on ALL data will be even larger. 
; 
 
_refine_ls_structure_factor_coef  Fsqd  
_refine_ls_matrix_type            full 
_refine_ls_weighting_scheme       calc  
_refine_ls_weighting_details 
 'calc w=1/[\s^2^(Fo^2^)+(0.0469P)^2^+0.4778P] where P=(Fo^2^+2Fc^2^)/3' 
_atom_sites_solution_primary      direct 
_atom_sites_solution_secondary    difmap 
_atom_sites_solution_hydrogens    geom 
_refine_ls_hydrogen_treatment     mixed 
_refine_ls_extinction_method      none 
_refine_ls_extinction_coef        ? 
_refine_ls_number_reflns          3417 
_refine_ls_number_parameters      229 
_refine_ls_number_restraints      0 
_refine_ls_R_factor_all           0.0509 
_refine_ls_R_factor_gt            0.0412 
_refine_ls_wR_factor_ref          0.1079 
_refine_ls_wR_factor_gt           0.1008 
_refine_ls_goodness_of_fit_ref    1.031 
_refine_ls_restrained_S_all       1.031 
_refine_ls_shift/su_max           0.000 
_refine_ls_shift/su_mean          0.000 
 
loop_ 
 _atom_site_label 
 _atom_site_type_symbol 
 _atom_site_fract_x 
 _atom_site_fract_y 
 _atom_site_fract_z 
 _atom_site_U_iso_or_equiv 
 _atom_site_adp_type 
 _atom_site_occupancy 
 _atom_site_symmetry_multiplicity 
 _atom_site_calc_flag 
 _atom_site_refinement_flags 
 _atom_site_disorder_assembly 
 _atom_site_disorder_group 
C15 C 1.02119(14) 0.73187(6) 0.82901(14) 0.0372(3) Uani 1 1 d . . . 
C16 C 1.21730(15) 0.66998(6) 0.96374(17) 0.0477(4) Uani 1 1 d . . . 
N1 N 0.49513(15) 0.92443(7) 1.14951(16) 0.0626(4) Uani 1 1 d . . . 
C9 C 0.98217(18) 0.91084(7) 0.96733(17) 0.0551(4) Uani 1 1 d . . . 
H6 H 0.9622 0.8878 1.0466 0.066 Uiso 1 1 calc R . . 
C7 C 0.71881(17) 0.90950(7) 0.85696(18) 0.0572(4) Uani 1 1 d . . . 
H12A H 0.6767 0.9364 0.9209 0.069 Uiso 1 1 calc R . . 
H12B H 0.6668 0.9131 0.7554 0.069 Uiso 1 1 calc R . . 
N2 N 0.89726(18) 0.95912(6) 0.73683(15) 0.0634(4) Uani 1 1 d . . . 
C14 C 0.82437(16) 0.79691(7) 0.73243(16) 0.0521(4) Uani 1 1 d . . . 
H14A H 0.8083 0.7705 0.6481 0.063 Uiso 1 1 calc R . . 
H14B H 0.8646 0.8317 0.6972 0.063 Uiso 1 1 calc R . . 
C2 C 0.70615(17) 0.87293(8) 1.24795(18) 0.0566(4) Uani 1 1 d . . . 
H3 H 0.7719 0.8442 1.2356 0.068 Uiso 1 1 calc R . . 
C6 C 0.57002(17) 0.84935(9) 0.99249(19) 0.0633(5) Uani 1 1 d . . . 
H11A H 0.5511 0.8100 1.0164 0.076 Uiso 1 1 calc R . . 
H11B H 0.4862 0.8638 0.9271 0.076 Uiso 1 1 calc R . . 
C3 C 0.72207(19) 0.90517(9) 1.37810(19) 0.0647(5) Uani 1 1 d . . . 
H4 H 0.7985 0.8985 1.4547 0.078 Uiso 1 1 calc R . . 
C4 C 0.6240(2) 0.94711(8) 1.3929(2) 0.0703(5) Uani 1 1 d . . . 
H5 H 0.6323 0.9697 1.4793 0.084 Uiso 1 1 calc R . . 
C13 C 0.68297(17) 0.80976(8) 0.78829(19) 0.0627(5) Uani 1 1 d . . . 
H13A H 0.6150 0.8240 0.7045 0.075 Uiso 1 1 calc R . . 
H13B H 0.6439 0.7747 0.8233 0.075 Uiso 1 1 calc R . . 
C5 C 0.5135(2) 0.95495(8) 1.2778(2) 0.0727(5) Uani 1 1 d . . . 
H1 H 0.4464 0.9833 1.2891 0.087 Uiso 1 1 calc R . . 
C12 C 1.0323(3) 0.97736(8) 0.7355(2) 0.0745(6) Uani 1 1 d . . . 
H9 H 1.0504 1.0005 0.6556 0.089 Uiso 1 1 calc R . . 
C10 C 1.1201(2) 0.93002(8) 0.9625(2) 0.0657(5) Uani 1 1 d . . . 
H7 H 1.1948 0.9200 1.0379 0.079 Uiso 1 1 calc R . . 
C11 C 1.1458(2) 0.96429(8) 0.8441(2) 0.0718(5) Uani 1 1 d . . . 
H8 H 1.2379 0.9782 0.8380 0.086 Uiso 1 1 calc R . . 
C18 C 1.1523(2) 0.61349(7) 0.9060(2) 0.0699(5) Uani 1 1 d . . . 
H18A H 1.0775 0.6028 0.9640 0.105 Uiso 1 1 calc R . . 
H18B H 1.2261 0.5847 0.9162 0.105 Uiso 1 1 calc R . . 
H18C H 1.1123 0.6172 0.8013 0.105 Uiso 1 1 calc R . . 
C19 C 1.2759(2) 0.66395(9) 1.1310(2) 0.0781(6) Uani 1 1 d . . . 
H19A H 1.3199 0.6992 1.1678 0.117 Uiso 1 1 calc R . . 
H19B H 1.3466 0.6340 1.1439 0.117 Uiso 1 1 calc R . . 
H19C H 1.1983 0.6548 1.1867 0.117 Uiso 1 1 calc R . . 
C17 C 1.3369(2) 0.68785(9) 0.8745(3) 0.0821(6) Uani 1 1 d . . . 
H17A H 1.2996 0.6895 0.7686 0.123 Uiso 1 1 calc R . . 
H17B H 1.4142 0.6606 0.8903 0.123 Uiso 1 1 calc R . . 
H17C H 1.3724 0.7247 0.9080 0.123 Uiso 1 1 calc R . . 
N4 N 0.92457(14) 0.77239(6) 0.85296(13) 0.0519(3) Uani 1 1 d . . . 
H4A H 0.9226 0.7841 0.9440 0.062 Uiso 1 1 calc R . . 
N5 N 1.10563(13) 0.71425(6) 0.95486(13) 0.0498(3) Uani 1 1 d . . . 
H5A H 1.0930 0.7305 1.0384 0.060 Uiso 1 1 calc R . . 
N3 N 0.69638(13) 0.85180(6) 0.91173(14) 0.0487(3) Uani 1 1 d . . . 
O1 O 1.02796(11) 0.71246(4) 0.70080(10) 0.0474(3) Uani 1 1 d . . . 
C8 C 0.87338(17) 0.92610(6) 0.85333(16) 0.0489(4) Uani 1 1 d . . . 
C1 C 0.59203(15) 0.88358(7) 1.13612(17) 0.0489(4) Uani 1 1 d . . . 
 
loop_ 
 _atom_site_aniso_label 
 _atom_site_aniso_U_11 
 _atom_site_aniso_U_22 
 _atom_site_aniso_U_33 
 _atom_site_aniso_U_23 
 _atom_site_aniso_U_13 
 _atom_site_aniso_U_12 
C15 0.0394(7) 0.0438(8) 0.0287(7) -0.0008(5) 0.0054(5) -0.0019(6) 
C16 0.0421(8) 0.0505(9) 0.0486(8) 0.0009(7) -0.0002(6) 0.0055(6) 
N1 0.0575(8) 0.0746(10) 0.0567(8) 0.0042(7) 0.0114(7) 0.0167(7) 
C9 0.0613(10) 0.0609(10) 0.0423(8) 0.0042(7) 0.0038(7) 0.0010(8) 
C7 0.0594(10) 0.0647(10) 0.0457(9) 0.0038(8) 0.0007(7) 0.0201(8) 
N2 0.0924(11) 0.0516(8) 0.0445(8) 0.0027(6) 0.0038(7) -0.0014(8) 
C14 0.0565(9) 0.0612(10) 0.0361(8) -0.0055(7) -0.0026(7) 0.0151(8) 
C2 0.0447(8) 0.0685(11) 0.0566(10) 0.0026(8) 0.0069(7) 0.0070(7) 
C6 0.0401(8) 0.0870(13) 0.0618(10) -0.0190(9) 0.0041(7) -0.0031(8) 
C3 0.0594(10) 0.0899(13) 0.0441(9) 0.0065(9) 0.0049(7) -0.0077(10) 
C4 0.0911(14) 0.0725(12) 0.0509(10) -0.0089(9) 0.0228(10) -0.0070(11) 
C13 0.0495(9) 0.0791(12) 0.0550(10) -0.0201(9) -0.0083(7) 0.0099(8) 
C5 0.0905(14) 0.0657(12) 0.0663(12) 0.0017(9) 0.0267(11) 0.0221(10) 
C12 0.1091(17) 0.0585(11) 0.0580(11) 0.0010(9) 0.0198(11) -0.0187(11) 
C10 0.0648(11) 0.0699(12) 0.0595(10) -0.0062(9) -0.0011(8) -0.0035(9) 
C11 0.0803(13) 0.0653(12) 0.0726(12) -0.0124(10) 0.0200(10) -0.0215(10) 
C18 0.0740(12) 0.0565(10) 0.0733(12) 0.0002(9) -0.0098(9) 0.0027(9) 
C19 0.0790(13) 0.0860(14) 0.0598(11) 0.0013(10) -0.0231(9) 0.0218(11) 
C17 0.0554(11) 0.0838(14) 0.1112(17) 0.0155(12) 0.0261(11) 0.0100(10) 
N4 0.0605(8) 0.0634(8) 0.0298(6) -0.0065(6) -0.0012(5) 0.0204(6) 
N5 0.0534(7) 0.0636(8) 0.0306(6) -0.0056(5) -0.0006(5) 0.0163(6) 
N3 0.0404(6) 0.0585(8) 0.0462(7) -0.0079(6) 0.0025(5) 0.0058(6) 
O1 0.0587(6) 0.0561(6) 0.0274(5) -0.0027(4) 0.0061(4) 0.0076(5) 
C8 0.0648(10) 0.0446(8) 0.0365(7) -0.0034(6) 0.0048(7) 0.0069(7) 
C1 0.0377(7) 0.0605(9) 0.0496(8) -0.0013(7) 0.0103(7) -0.0007(7) 
 
_geom_special_details 
; 
 All esds (except the esd in the dihedral angle between two l.s. planes) 
 are estimated using the full covariance matrix.  The cell esds are taken 
 into account individually in the estimation of esds in distances, angles 
 and torsion angles; correlations between esds in cell parameters are only 
 used when they are defined by crystal symmetry.  An approximate (isotropic) 
 treatment of cell esds is used for estimating esds involving l.s. planes. 
; 
 
loop_ 
 _geom_bond_atom_site_label_1 
 _geom_bond_atom_site_label_2 
 _geom_bond_distance 
 _geom_bond_site_symmetry_2 
 _geom_bond_publ_flag 
C15 O1 1.2407(15) . ? 
C15 N5 1.3440(17) . ? 
C15 N4 1.3492(18) . ? 
C16 N5 1.4673(19) . ? 
C16 C18 1.518(2) . ? 
C16 C17 1.520(2) . ? 
C16 C19 1.522(2) . ? 
N1 C1 1.336(2) . ? 
N1 C5 1.341(2) . ? 
C9 C10 1.373(2) . ? 
C9 C8 1.381(2) . ? 
C7 N3 1.464(2) . ? 
C7 C8 1.502(2) . ? 
N2 C12 1.336(3) . ? 
N2 C8 1.340(2) . ? 
C14 N4 1.4430(18) . ? 
C14 C13 1.508(2) . ? 
C2 C3 1.376(2) . ? 
C2 C1 1.378(2) . ? 
C6 N3 1.469(2) . ? 
C6 C1 1.502(2) . ? 
C3 C4 1.364(3) . ? 
C4 C5 1.363(3) . ? 
C13 N3 1.470(2) . ? 
C12 C11 1.367(3) . ? 
C10 C11 1.375(3) . ? 
 
loop_ 
 _geom_angle_atom_site_label_1 
 _geom_angle_atom_site_label_2 
 _geom_angle_atom_site_label_3 
 _geom_angle 
 _geom_angle_site_symmetry_1 
 _geom_angle_site_symmetry_3 
 _geom_angle_publ_flag 
O1 C15 N5 123.84(13) . . ? 
O1 C15 N4 121.77(12) . . ? 
N5 C15 N4 114.38(11) . . ? 
N5 C16 C18 110.59(13) . . ? 
N5 C16 C17 110.31(14) . . ? 
C18 C16 C17 110.62(16) . . ? 
N5 C16 C19 105.94(13) . . ? 
C18 C16 C19 108.87(15) . . ? 
C17 C16 C19 110.39(15) . . ? 
C1 N1 C5 116.90(15) . . ? 
C10 C9 C8 119.38(16) . . ? 
N3 C7 C8 115.48(12) . . ? 
C12 N2 C8 116.92(15) . . ? 
N4 C14 C13 109.98(13) . . ? 
C3 C2 C1 119.48(16) . . ? 
N3 C6 C1 111.96(13) . . ? 
C4 C3 C2 118.92(17) . . ? 
C5 C4 C3 118.26(17) . . ? 
N3 C13 C14 113.26(13) . . ? 
N1 C5 C4 124.29(17) . . ? 
N2 C12 C11 124.30(17) . . ? 
C9 C10 C11 118.84(17) . . ? 
C12 C11 C10 118.22(18) . . ? 
C15 N4 C14 122.85(11) . . ? 
C15 N5 C16 126.40(12) . . ? 
C7 N3 C6 111.25(13) . . ? 
C7 N3 C13 111.81(13) . . ? 
C6 N3 C13 110.55(13) . . ? 
N2 C8 C9 122.35(16) . . ? 
N2 C8 C7 115.61(14) . . ? 
C9 C8 C7 121.94(14) . . ? 
N1 C1 C2 122.14(15) . . ? 
N1 C1 C6 116.52(14) . . ? 
C2 C1 C6 121.34(15) . . ? 
 
_diffrn_measured_fraction_theta_max    1.000 
_diffrn_reflns_theta_full              25.00 
_diffrn_measured_fraction_theta_full   1.000 
_refine_diff_density_max    0.142 
_refine_diff_density_min   -0.177 
_refine_diff_density_rms    0.034 
#END
  
data_Complex1 
 
_audit_creation_method            SHELXL-97 
_chemical_name_systematic 
; 
 ? 
; 
_chemical_name_common             ? 
_chemical_melting_point           ? 
_chemical_formula_moiety          ? 
_chemical_formula_sum 
 'C38 H54 N10 O12 S2 Zn2' 
_chemical_formula_weight          1037.77 
 
loop_ 
 _atom_type_symbol 
 _atom_type_description 
 _atom_type_scat_dispersion_real 
 _atom_type_scat_dispersion_imag 
 _atom_type_scat_source 
 'C'  'C'   0.0033   0.0016 
 'International Tables Vol C Tables 4.2.6.8 and 6.1.1.4' 
 'H'  'H'   0.0000   0.0000 
 'International Tables Vol C Tables 4.2.6.8 and 6.1.1.4' 
 'N'  'N'   0.0061   0.0033 
 'International Tables Vol C Tables 4.2.6.8 and 6.1.1.4' 
 'O'  'O'   0.0106   0.0060 
 'International Tables Vol C Tables 4.2.6.8 and 6.1.1.4' 
 'S'  'S'   0.1246   0.1234 
 'International Tables Vol C Tables 4.2.6.8 and 6.1.1.4' 
 'Zn'  'Zn'   0.2839   1.4301 
 'International Tables Vol C Tables 4.2.6.8 and 6.1.1.4' 
 
_symmetry_cell_setting            'Triclinic' 
_symmetry_space_group_name_H-M    'P-1' 
 
loop_ 
 _symmetry_equiv_pos_as_xyz 
 'x, y, z' 
 '-x, -y, -z' 
 
_cell_length_a                    9.1081(5) 
_cell_length_b                    9.5838(5) 
_cell_length_c                    14.8352(8) 
_cell_angle_alpha                 78.6128(12) 
_cell_angle_beta                  73.7441(11) 
_cell_angle_gamma                 66.1009(11) 
_cell_volume                      1131.38(11) 
_cell_formula_units_Z             1 
_cell_measurement_temperature     150(2) 
_cell_measurement_reflns_used     7182 
_cell_measurement_theta_min       2.34 
_cell_measurement_theta_max       30.76 
 
_exptl_crystal_description        'block' 
_exptl_crystal_colour             'colourless'  
_exptl_crystal_size_max           0.28 
_exptl_crystal_size_mid           0.16 
_exptl_crystal_size_min           0.12 
_exptl_crystal_density_meas       ? 
_exptl_crystal_density_diffrn     1.523 
_exptl_crystal_density_method     'not measured' 
_exptl_crystal_F_000              540 
_exptl_absorpt_coefficient_mu     1.223 
_exptl_absorpt_correction_type    'MULTI-SCAN' 
_exptl_absorpt_correction_T_min   0.7257 
_exptl_absorpt_correction_T_max   0.8671 
_exptl_absorpt_process_details    'SADABS' 
 
_exptl_special_details 
; 
 ? 
; 
 
_diffrn_ambient_temperature       150(2) 
_diffrn_radiation_wavelength      0.71073 
_diffrn_radiation_type            MoK\a 
_diffrn_radiation_source          'fine-focus sealed tube' 
_diffrn_radiation_monochromator   graphite 
_diffrn_measurement_device_type   'Bruker APEX-II CCD' 
_diffrn_measurement_method        '\f and \w scans' 
_diffrn_detector_area_resol_mean  ? 
_diffrn_reflns_number             10841 
_diffrn_reflns_av_R_equivalents   0.0234 
_diffrn_reflns_av_sigmaI/netI     0.0269 
_diffrn_reflns_limit_h_min        -10 
_diffrn_reflns_limit_h_max        10 
_diffrn_reflns_limit_k_min        -11 
_diffrn_reflns_limit_k_max        11 
_diffrn_reflns_limit_l_min        -17 
_diffrn_reflns_limit_l_max        17 
_diffrn_reflns_theta_min          1.44 
_diffrn_reflns_theta_max          25.00 
_reflns_number_total              3945 
_reflns_number_gt                 3680 
_reflns_threshold_expression      >2sigma(I) 
 
_computing_data_collection        'Bruker APEX2' 
_computing_cell_refinement        'Bruker SAINT' 
_computing_data_reduction         'Bruker SAINT' 
_computing_structure_solution     'SHELXS-97 (Sheldrick, 2008)' 
_computing_structure_refinement   'SHELXL-97 (Sheldrick, 2008)' 
_computing_molecular_graphics     'MERCURY 3.2' 
_computing_publication_material   'ORTEP 3V.2' 
 
_refine_special_details 
; 
 Refinement of F^2^ against ALL reflections.  The weighted R-factor wR and 
 goodness of fit S are based on F^2^, conventional R-factors R are based 
 on F, with F set to zero for negative F^2^. The threshold expression of 
 F^2^ > 2sigma(F^2^) is used only for calculating R-factors(gt) etc. and is 
 not relevant to the choice of reflections for refinement.  R-factors based 
 on F^2^ are statistically about twice as large as those based on F, and R- 
 factors based on ALL data will be even larger. 
; 
 
_refine_ls_structure_factor_coef  Fsqd  
_refine_ls_matrix_type            full 
_refine_ls_weighting_scheme       calc  
_refine_ls_weighting_details 
 'calc w=1/[\s^2^(Fo^2^)+(0.0600P)^2^+0.7902P] where P=(Fo^2^+2Fc^2^)/3' 
_atom_sites_solution_primary      direct 
_atom_sites_solution_secondary    difmap 
_atom_sites_solution_hydrogens    geom 
_refine_ls_hydrogen_treatment     mixed 
_refine_ls_extinction_method      none 
_refine_ls_extinction_coef        ? 
_refine_ls_number_reflns          3945 
_refine_ls_number_parameters      292 
_refine_ls_number_restraints      0 
_refine_ls_R_factor_all           0.0325 
_refine_ls_R_factor_gt            0.0301 
_refine_ls_wR_factor_ref          0.0950 
_refine_ls_wR_factor_gt           0.0927 
_refine_ls_goodness_of_fit_ref    1.070 
_refine_ls_restrained_S_all       1.070 
_refine_ls_shift/su_max           0.001 
_refine_ls_shift/su_mean          0.000 
 
loop_ 
 _atom_site_label 
 _atom_site_type_symbol 
 _atom_site_fract_x 
 _atom_site_fract_y 
 _atom_site_fract_z 
 _atom_site_U_iso_or_equiv 
 _atom_site_adp_type 
 _atom_site_occupancy 
 _atom_site_symmetry_multiplicity 
 _atom_site_calc_flag 
 _atom_site_refinement_flags 
 _atom_site_disorder_assembly 
 _atom_site_disorder_group 
Zn1 Zn 0.12884(3) 0.09151(3) 0.360983(17) 0.01379(11) Uani 1 1 d . . . 
S1 S -0.12087(7) 0.23890(6) 0.53664(4) 0.01313(15) Uani 1 1 d . . . 
N2 N 0.1480(2) 0.3203(2) 0.29770(13) 0.0153(4) Uani 1 1 d . . . 
C7 C 0.2172(3) 0.2905(3) 0.19759(17) 0.0184(5) Uani 1 1 d . . . 
H7A H 0.3305 0.2187 0.1896 0.022 Uiso 1 1 calc R . . 
H7B H 0.2158 0.3852 0.1590 0.022 Uiso 1 1 calc R . . 
C5 C 0.3986(3) 0.1852(3) 0.35920(16) 0.0178(5) Uani 1 1 d . . . 
C1 C 0.4730(3) -0.0784(3) 0.39236(16) 0.0194(5) Uani 1 1 d . . . 
H1 H 0.4467 -0.1649 0.4001 0.023 Uiso 1 1 calc R . . 
C8 C 0.1161(3) 0.2250(3) 0.16713(16) 0.0176(5) Uani 1 1 d . . . 
C2 C 0.6258(3) -0.0971(3) 0.40167(17) 0.0233(6) Uani 1 1 d . . . 
H2 H 0.7014 -0.1940 0.4155 0.028 Uiso 1 1 calc R . . 
C16 C 0.4592(3) 0.7243(3) 0.12506(17) 0.0224(6) Uani 1 1 d . . . 
C12 C -0.0119(3) 0.0489(3) 0.20712(18) 0.0211(5) Uani 1 1 d . . . 
H12 H -0.0371 -0.0283 0.2492 0.025 Uiso 1 1 calc R . . 
C6 C 0.2670(3) 0.3387(3) 0.33938(18) 0.0194(5) Uani 1 1 d . . . 
H6A H 0.2099 0.3867 0.3977 0.023 Uiso 1 1 calc R . . 
H6B H 0.3179 0.4051 0.2964 0.023 Uiso 1 1 calc R . . 
C11 C -0.0659(4) 0.0902(3) 0.1243(2) 0.0297(6) Uani 1 1 d . . . 
H11 H -0.1274 0.0425 0.1110 0.036 Uiso 1 1 calc R . . 
C3 C 0.6646(3) 0.0325(3) 0.38986(18) 0.0248(6) Uani 1 1 d . . . 
H3 H 0.7660 0.0238 0.3976 0.030 Uiso 1 1 calc R . . 
C4 C 0.5510(3) 0.1747(3) 0.36652(18) 0.0231(5) Uani 1 1 d . . . 
H4 H 0.5769 0.2619 0.3559 0.028 Uiso 1 1 calc R . . 
C9 C 0.0662(3) 0.2710(3) 0.08294(18) 0.0260(6) Uani 1 1 d . . . 
H9 H 0.0950 0.3467 0.0411 0.031 Uiso 1 1 calc R . . 
C10 C -0.0268(4) 0.2040(3) 0.06100(19) 0.0320(7) Uani 1 1 d . . . 
H10 H -0.0624 0.2348 0.0048 0.038 Uiso 1 1 calc R . . 
N1 N 0.0755(2) 0.1159(2) 0.22933(13) 0.0164(4) Uani 1 1 d . . . 
N3 N 0.3594(2) 0.0598(2) 0.37251(13) 0.0162(4) Uani 1 1 d . . . 
N6 N 0.0702(3) 0.6688(2) 0.25032(14) 0.0189(4) Uani 1 1 d . . . 
H6 H 0.0526 0.7146 0.2988 0.023 Uiso 1 1 calc R . . 
N5 N 0.3058(3) 0.7231(2) 0.19236(14) 0.0202(4) Uani 1 1 d . . . 
H5 H 0.2815 0.7599 0.2453 0.024 Uiso 1 1 calc R . . 
C19 C 0.5312(4) 0.8036(3) 0.1704(2) 0.0291(6) Uani 1 1 d . . . 
H19A H 0.4525 0.9047 0.1831 0.044 Uiso 1 1 calc R . . 
H19B H 0.6299 0.8107 0.1283 0.044 Uiso 1 1 calc R . . 
H19C H 0.5566 0.7455 0.2284 0.044 Uiso 1 1 calc R . . 
C17 C 0.4225(4) 0.8164(3) 0.03123(19) 0.0319(6) Uani 1 1 d . . . 
H17A H 0.3843 0.7631 0.0001 0.048 Uiso 1 1 calc R . . 
H17B H 0.5211 0.8278 -0.0083 0.048 Uiso 1 1 calc R . . 
H17C H 0.3391 0.9158 0.0434 0.048 Uiso 1 1 calc R . . 
C18 C 0.5789(4) 0.5593(3) 0.1098(2) 0.0337(7) Uani 1 1 d . . . 
H18A H 0.5995 0.5042 0.1693 0.051 Uiso 1 1 calc R . . 
H18B H 0.6807 0.5602 0.0684 0.051 Uiso 1 1 calc R . . 
H18C H 0.5316 0.5099 0.0820 0.051 Uiso 1 1 calc R . . 
C15 C 0.2006(3) 0.6681(3) 0.17660(16) 0.0181(5) Uani 1 1 d . . . 
C14 C -0.0389(3) 0.5939(3) 0.24830(17) 0.0193(5) Uani 1 1 d . . . 
H14A H -0.0201 0.5714 0.1842 0.023 Uiso 1 1 calc R . . 
H14B H -0.1519 0.6646 0.2658 0.023 Uiso 1 1 calc R . . 
C13 C -0.0178(3) 0.4456(3) 0.31337(17) 0.0179(5) Uani 1 1 d . . . 
H13A H -0.0463 0.4707 0.3778 0.022 Uiso 1 1 calc R . . 
H13B H -0.0970 0.4059 0.3076 0.022 Uiso 1 1 calc R . . 
O2 O -0.0845(2) 0.16028(18) 0.45077(11) 0.0175(4) Uani 1 1 d . . . 
O5 O -0.2605(2) 0.3832(2) 0.53350(12) 0.0239(4) Uani 1 1 d . . . 
O3 O -0.1675(2) 0.13777(18) 0.62108(11) 0.0205(4) Uani 1 1 d . . . 
O4 O 0.0239(2) 0.2615(2) 0.54306(12) 0.0235(4) Uani 1 1 d . . . 
O1 O 0.2181(2) 0.6214(2) 0.10076(12) 0.0225(4) Uani 1 1 d . . . 
O6 O 0.4064(2) 0.4743(2) 0.62769(14) 0.0363(5) Uani 1 1 d . . . 
 
loop_ 
 _atom_site_aniso_label 
 _atom_site_aniso_U_11 
 _atom_site_aniso_U_22 
 _atom_site_aniso_U_33 
 _atom_site_aniso_U_23 
 _atom_site_aniso_U_13 
 _atom_site_aniso_U_12 
Zn1 0.01490(18) 0.01477(16) 0.01207(16) -0.00074(10) -0.00286(11) -0.00625(12) 
S1 0.0133(3) 0.0131(3) 0.0124(3) -0.0012(2) -0.0028(2) -0.0045(2) 
N2 0.0125(10) 0.0174(10) 0.0147(10) -0.0027(8) -0.0014(8) -0.0049(8) 
C7 0.0179(13) 0.0168(11) 0.0163(12) -0.0005(9) 0.0010(10) -0.0059(10) 
C5 0.0176(13) 0.0215(12) 0.0145(11) -0.0024(9) -0.0033(10) -0.0075(10) 
C1 0.0217(13) 0.0188(11) 0.0160(12) -0.0037(9) -0.0044(10) -0.0048(10) 
C8 0.0149(12) 0.0164(11) 0.0156(11) -0.0041(9) -0.0016(10) 0.0002(10) 
C2 0.0184(14) 0.0265(13) 0.0193(12) -0.0076(10) -0.0057(10) 0.0007(11) 
C16 0.0230(14) 0.0244(13) 0.0195(13) -0.0028(10) -0.0023(11) -0.0098(11) 
C12 0.0213(14) 0.0196(12) 0.0220(12) -0.0060(10) -0.0042(10) -0.0058(10) 
C6 0.0198(13) 0.0176(12) 0.0226(12) -0.0016(9) -0.0033(10) -0.0099(10) 
C11 0.0294(16) 0.0330(15) 0.0320(15) -0.0099(12) -0.0142(12) -0.0090(12) 
C3 0.0140(13) 0.0393(15) 0.0213(13) -0.0075(11) -0.0031(10) -0.0087(12) 
C4 0.0212(14) 0.0309(14) 0.0207(13) -0.0030(10) -0.0024(11) -0.0144(12) 
C9 0.0289(15) 0.0268(13) 0.0162(12) 0.0016(10) -0.0032(11) -0.0069(12) 
C10 0.0351(17) 0.0379(16) 0.0214(13) -0.0038(12) -0.0153(12) -0.0057(13) 
N1 0.0172(11) 0.0157(9) 0.0145(9) -0.0036(8) -0.0021(8) -0.0042(8) 
N3 0.0155(10) 0.0183(10) 0.0148(10) -0.0026(8) -0.0032(8) -0.0059(8) 
N6 0.0248(12) 0.0175(10) 0.0146(10) -0.0041(8) -0.0010(9) -0.0093(9) 
N5 0.0216(12) 0.0249(11) 0.0142(10) -0.0073(8) -0.0003(8) -0.0087(9) 
C19 0.0272(15) 0.0387(15) 0.0261(14) -0.0065(12) -0.0012(12) -0.0183(13) 
C17 0.0382(17) 0.0376(16) 0.0222(14) 0.0030(12) -0.0045(12) -0.0205(14) 
C18 0.0273(16) 0.0304(15) 0.0369(16) -0.0100(12) -0.0002(13) -0.0057(13) 
C15 0.0228(14) 0.0121(11) 0.0173(12) 0.0009(9) -0.0068(10) -0.0038(10) 
C14 0.0184(13) 0.0191(12) 0.0187(12) -0.0024(9) -0.0053(10) -0.0042(10) 
C13 0.0158(13) 0.0170(11) 0.0199(12) -0.0033(9) -0.0024(10) -0.0054(10) 
O2 0.0198(9) 0.0221(8) 0.0130(8) -0.0034(6) -0.0015(7) -0.0111(7) 
O5 0.0205(10) 0.0212(9) 0.0202(9) -0.0010(7) -0.0033(7) 0.0007(7) 
O3 0.0301(10) 0.0169(8) 0.0144(8) -0.0025(6) -0.0012(7) -0.0108(8) 
O4 0.0178(9) 0.0323(10) 0.0248(9) -0.0063(8) -0.0047(8) -0.0123(8) 
O1 0.0320(11) 0.0252(9) 0.0129(8) -0.0022(7) -0.0042(7) -0.0135(8) 
O6 0.0237(11) 0.0450(12) 0.0280(10) 0.0050(9) -0.0020(8) -0.0070(9) 
 
_geom_special_details 
; 
 All esds (except the esd in the dihedral angle between two l.s. planes) 
 are estimated using the full covariance matrix.  The cell esds are taken 
 into account individually in the estimation of esds in distances, angles 
 and torsion angles; correlations between esds in cell parameters are only 
 used when they are defined by crystal symmetry.  An approximate (isotropic) 
 treatment of cell esds is used for estimating esds involving l.s. planes. 
; 
 
loop_ 
 _geom_bond_atom_site_label_1 
 _geom_bond_atom_site_label_2 
 _geom_bond_distance 
 _geom_bond_site_symmetry_2 
 _geom_bond_publ_flag 
Zn1 O2 1.9608(17) . ? 
Zn1 N3 2.048(2) . ? 
Zn1 O3 2.0536(16) 2_556 ? 
Zn1 N1 2.0892(19) . ? 
Zn1 N2 2.264(2) . ? 
S1 O4 1.4507(18) . ? 
S1 O5 1.4542(18) . ? 
S1 O2 1.4970(16) . ? 
S1 O3 1.4984(17) . ? 
N2 C6 1.470(3) . ? 
N2 C7 1.477(3) . ? 
N2 C13 1.490(3) . ? 
C7 C8 1.503(3) . ? 
C5 N3 1.351(3) . ? 
C5 C4 1.385(4) . ? 
C5 C6 1.511(3) . ? 
C1 N3 1.349(3) . ? 
C1 C2 1.372(4) . ? 
C8 N1 1.351(3) . ? 
C8 C9 1.378(4) . ? 
C2 C3 1.391(4) . ? 
C16 N5 1.475(3) . ? 
C16 C19 1.520(4) . ? 
C16 C18 1.532(4) . ? 
C16 C17 1.538(4) . ? 
C12 N1 1.341(3) . ? 
C12 C11 1.378(4) . ? 
C11 C10 1.386(4) . ? 
C3 C4 1.385(4) . ? 
C9 C10 1.383(4) . ? 
N6 C15 1.370(3) . ? 
N6 C14 1.451(3) . ? 
N5 C15 1.354(3) . ? 
C15 O1 1.238(3) . ? 
C14 C13 1.526(3) . ? 
O3 Zn1 2.0536(16) 2_556 ? 
 
loop_ 
 _geom_angle_atom_site_label_1 
 _geom_angle_atom_site_label_2 
 _geom_angle_atom_site_label_3 
 _geom_angle 
 _geom_angle_site_symmetry_1 
 _geom_angle_site_symmetry_3 
 _geom_angle_publ_flag 
O2 Zn1 N3 130.74(7) . . ? 
O2 Zn1 O3 97.29(7) . 2_556 ? 
N3 Zn1 O3 95.14(7) . 2_556 ? 
O2 Zn1 N1 105.98(7) . . ? 
N3 Zn1 N1 121.16(8) . . ? 
O3 Zn1 N1 91.43(7) 2_556 . ? 
O2 Zn1 N2 100.30(7) . . ? 
N3 Zn1 N2 77.92(7) . . ? 
O3 Zn1 N2 161.38(7) 2_556 . ? 
N1 Zn1 N2 77.92(7) . . ? 
O4 S1 O5 111.75(11) . . ? 
O4 S1 O2 110.24(10) . . ? 
O5 S1 O2 109.35(10) . . ? 
O4 S1 O3 109.34(10) . . ? 
O5 S1 O3 108.36(10) . . ? 
O2 S1 O3 107.68(9) . . ? 
C6 N2 C7 111.45(19) . . ? 
C6 N2 C13 114.20(18) . . ? 
C7 N2 C13 112.86(18) . . ? 
C6 N2 Zn1 106.60(14) . . ? 
C7 N2 Zn1 100.16(13) . . ? 
C13 N2 Zn1 110.49(14) . . ? 
N2 C7 C8 109.16(19) . . ? 
N3 C5 C4 121.5(2) . . ? 
N3 C5 C6 117.3(2) . . ? 
C4 C5 C6 121.1(2) . . ? 
N3 C1 C2 122.9(2) . . ? 
N1 C8 C9 121.4(2) . . ? 
N1 C8 C7 114.8(2) . . ? 
C9 C8 C7 123.8(2) . . ? 
C1 C2 C3 118.3(2) . . ? 
N5 C16 C19 106.0(2) . . ? 
N5 C16 C18 109.6(2) . . ? 
C19 C16 C18 110.2(2) . . ? 
N5 C16 C17 110.7(2) . . ? 
C19 C16 C17 109.1(2) . . ? 
C18 C16 C17 111.1(2) . . ? 
N1 C12 C11 122.5(2) . . ? 
N2 C6 C5 110.78(19) . . ? 
C12 C11 C10 118.7(3) . . ? 
C4 C3 C2 119.4(2) . . ? 
C5 C4 C3 119.1(2) . . ? 
C8 C9 C10 119.7(2) . . ? 
C9 C10 C11 118.8(2) . . ? 
C12 N1 C8 118.9(2) . . ? 
C12 N1 Zn1 125.93(16) . . ? 
C8 N1 Zn1 114.56(15) . . ? 
C1 N3 C5 118.7(2) . . ? 
C1 N3 Zn1 123.71(17) . . ? 
C5 N3 Zn1 117.62(16) . . ? 
C15 N6 C14 121.4(2) . . ? 
C15 N5 C16 124.6(2) . . ? 
O1 C15 N5 123.1(2) . . ? 
O1 C15 N6 121.3(2) . . ? 
N5 C15 N6 115.6(2) . . ? 
N6 C14 C13 114.5(2) . . ? 
N2 C13 C14 117.2(2) . . ? 
S1 O2 Zn1 125.46(10) . . ? 
S1 O3 Zn1 131.79(10) . 2_556 ? 
 
_diffrn_measured_fraction_theta_max    0.992 
_diffrn_reflns_theta_full              25.00 
_diffrn_measured_fraction_theta_full   0.992 
_refine_diff_density_max    0.686 
_refine_diff_density_min   -0.513 
_refine_diff_density_rms    0.083 
#END
  
data_Complex2
 
_audit_creation_method            SHELXL-97 
_chemical_name_systematic 
; 
 ? 
; 
_chemical_name_common             ? 
_chemical_melting_point           ? 
_chemical_formula_moiety          ? 
_chemical_formula_sum 
 'C42 H78 Cd2 N10 O18 S4' 
_chemical_formula_weight          1364.18 
 
loop_ 
 _atom_type_symbol 
 _atom_type_description 
 _atom_type_scat_dispersion_real 
 _atom_type_scat_dispersion_imag 
 _atom_type_scat_source 
 'C'  'C'   0.0033   0.0016 
 'International Tables Vol C Tables 4.2.6.8 and 6.1.1.4' 
 'H'  'H'   0.0000   0.0000 
 'International Tables Vol C Tables 4.2.6.8 and 6.1.1.4' 
 'N'  'N'   0.0061   0.0033 
 'International Tables Vol C Tables 4.2.6.8 and 6.1.1.4' 
 'O'  'O'   0.0106   0.0060 
 'International Tables Vol C Tables 4.2.6.8 and 6.1.1.4' 
 'S'  'S'   0.1246   0.1234 
 'International Tables Vol C Tables 4.2.6.8 and 6.1.1.4' 
 'Cd'  'Cd'  -0.8075   1.2024 
 'International Tables Vol C Tables 4.2.6.8 and 6.1.1.4' 
 
_symmetry_cell_setting            'Monoclinic' 
_symmetry_space_group_name_H-M    'P2(1)/n' 
 
loop_ 
 _symmetry_equiv_pos_as_xyz 
 'x, y, z' 
 '-x+1/2, y+1/2, -z+1/2' 
 '-x, -y, -z' 
 'x-1/2, -y-1/2, z-1/2' 
 
_cell_length_a                    16.1563(12) 
_cell_length_b                    11.0458(8) 
_cell_length_c                    16.3922(12) 
_cell_angle_alpha                 90.00 
_cell_angle_beta                  104.037(2) 
_cell_angle_gamma                 90.00 
_cell_volume                      2838.0(4) 
_cell_formula_units_Z             2 
_cell_measurement_temperature     150(2) 
_cell_measurement_reflns_used     9173 
_cell_measurement_theta_min       2.24 
_cell_measurement_theta_max       31.22 
 
_exptl_crystal_description        'Block' 
_exptl_crystal_colour             'Colourless' 
_exptl_crystal_size_max           0.26 
_exptl_crystal_size_mid           0.16 
_exptl_crystal_size_min           0.12 
_exptl_crystal_density_meas       ? 
_exptl_crystal_density_diffrn     1.596 
_exptl_crystal_density_method     'not measured' 
_exptl_crystal_F_000              1408 
_exptl_absorpt_coefficient_mu     0.973 
_exptl_absorpt_correction_type    'multi-scan' 
_exptl_absorpt_correction_T_min   0.7861 
_exptl_absorpt_correction_T_max   0.8922 
_exptl_absorpt_process_details    'SADABS' 
 
_exptl_special_details 
; 
 ? 
; 
 
_diffrn_ambient_temperature       150(2) 
_diffrn_radiation_wavelength      0.71073 
_diffrn_radiation_type            MoK\a 
_diffrn_radiation_source          'fine-focus sealed tube' 
_diffrn_radiation_monochromator   graphite 
_diffrn_measurement_device_type   'Bruker APEX-II CCD' 
_diffrn_measurement_method        '\f and \w scans' 
_diffrn_detector_area_resol_mean  ? 
_diffrn_reflns_number             32918 
_diffrn_reflns_av_R_equivalents   0.0226 
_diffrn_reflns_av_sigmaI/netI     0.0145 
_diffrn_reflns_limit_h_min        -19 
_diffrn_reflns_limit_h_max        19 
_diffrn_reflns_limit_k_min        -12 
_diffrn_reflns_limit_k_max        13 
_diffrn_reflns_limit_l_min        -18 
_diffrn_reflns_limit_l_max        19 
_diffrn_reflns_theta_min          1.59 
_diffrn_reflns_theta_max          25.00 
_reflns_number_total              4993 
_reflns_number_gt                 4808 
_reflns_threshold_expression      >2sigma(I) 
 
_computing_data_collection        'Bruker APEX2' 
_computing_cell_refinement        'Bruker SAINT' 
_computing_data_reduction         'Bruker SAINT' 
_computing_structure_solution     'SHELXS-97 (Sheldrick, 2008)' 
_computing_structure_refinement   'SHELXL-97 (Sheldrick, 2008)' 
_computing_molecular_graphics     'Mercury 3.2' 
_computing_publication_material   'ORTEP 3V.2' 
 
_refine_special_details 
; 
 Refinement of F^2^ against ALL reflections.  The weighted R-factor wR and 
 goodness of fit S are based on F^2^, conventional R-factors R are based 
 on F, with F set to zero for negative F^2^. The threshold expression of 
 F^2^ > 2sigma(F^2^) is used only for calculating R-factors(gt) etc. and is 
 not relevant to the choice of reflections for refinement.  R-factors based 
 on F^2^ are statistically about twice as large as those based on F, and R- 
 factors based on ALL data will be even larger. 
; 
 
_refine_ls_structure_factor_coef  Fsqd  
_refine_ls_matrix_type            full 
_refine_ls_weighting_scheme       calc  
_refine_ls_weighting_details 
 'calc w=1/[\s^2^(Fo^2^)+(0.0278P)^2^+1.6432P] where P=(Fo^2^+2Fc^2^)/3' 
_atom_sites_solution_primary      direct 
_atom_sites_solution_secondary    difmap 
_atom_sites_solution_hydrogens    geom 
_refine_ls_hydrogen_treatment     mixed 
_refine_ls_extinction_method      SHELXL 
_refine_ls_extinction_coef        0.00277(15) 
_refine_ls_extinction_expression 
 'Fc^*^=kFc[1+0.001xFc^2^\l^3^/sin(2\q)]^-1/4^' 
_refine_ls_number_reflns          4993 
_refine_ls_number_parameters      381 
_refine_ls_number_restraints      0 
_refine_ls_R_factor_all           0.0198 
_refine_ls_R_factor_gt            0.0190 
_refine_ls_wR_factor_ref          0.0515 
_refine_ls_wR_factor_gt           0.0510 
_refine_ls_goodness_of_fit_ref    1.090 
_refine_ls_restrained_S_all       1.090 
_refine_ls_shift/su_max           0.005 
_refine_ls_shift/su_mean          0.000 
 
loop_ 
 _atom_site_label 
 _atom_site_type_symbol 
 _atom_site_fract_x 
 _atom_site_fract_y 
 _atom_site_fract_z 
 _atom_site_U_iso_or_equiv 
 _atom_site_adp_type 
 _atom_site_occupancy 
 _atom_site_symmetry_multiplicity 
 _atom_site_calc_flag 
 _atom_site_refinement_flags 
 _atom_site_disorder_assembly 
 _atom_site_disorder_group 
Cd1 Cd 0.615052(7) 0.119285(10) 0.572874(7) 0.01318(6) Uani 1 1 d . . . 
S1 S 0.58916(2) -0.14235(4) 0.45269(3) 0.01357(9) Uani 1 1 d . . . 
O3 O 0.60024(7) -0.20091(11) 0.53574(7) 0.0192(3) Uani 1 1 d . . . 
O2 O 0.58862(8) -0.00878(11) 0.46245(7) 0.0201(3) Uani 1 1 d . . . 
O1 O 0.61359(8) -0.04215(12) 0.66100(8) 0.0190(3) Uani 1 1 d . . . 
O4 O 0.65913(7) -0.17853(11) 0.41547(8) 0.0207(3) Uani 1 1 d . . . 
N3 N 0.60331(9) 0.28337(13) 0.48199(9) 0.0173(3) Uani 1 1 d . . . 
O5 O 0.50738(7) -0.18049(11) 0.39632(7) 0.0187(3) Uani 1 1 d . . . 
N1 N 0.76273(9) 0.10644(12) 0.59049(9) 0.0159(3) Uani 1 1 d . . . 
N2 N 0.67910(8) 0.29645(12) 0.65445(8) 0.0141(3) Uani 1 1 d . . . 
C7 C 0.62247(11) 0.39507(15) 0.61305(11) 0.0174(4) Uani 1 1 d . . . 
H7A H 0.6468 0.4723 0.6347 0.021 Uiso 1 1 calc R . . 
H7B H 0.5674 0.3873 0.6265 0.021 Uiso 1 1 calc R . . 
C8 C 0.61010(10) 0.39280(15) 0.51849(11) 0.0169(4) Uani 1 1 d . . . 
C5 C 0.81079(10) 0.19892(15) 0.62824(10) 0.0155(3) Uani 1 1 d . . . 
C12 C 0.59332(11) 0.27678(17) 0.39832(11) 0.0231(4) Uani 1 1 d . . . 
H12 H 0.5877 0.2011 0.3727 0.028 Uiso 1 1 calc R . . 
C4 C 0.89925(11) 0.19327(17) 0.64893(12) 0.0223(4) Uani 1 1 d . . . 
H4 H 0.9317 0.2573 0.6766 0.027 Uiso 1 1 calc R . . 
C13 C 0.67933(11) 0.29251(16) 0.74487(10) 0.0187(3) Uani 1 1 d . . . 
H13A H 0.6209 0.2882 0.7502 0.022 Uiso 1 1 calc R . . 
H13B H 0.7041 0.3669 0.7715 0.022 Uiso 1 1 calc R . . 
C9 C 0.60603(11) 0.49903(16) 0.47255(12) 0.0236(4) Uani 1 1 d . . . 
H9 H 0.6091 0.5740 0.4989 0.028 Uiso 1 1 calc R . . 
C1 C 0.80147(11) 0.00747(16) 0.57007(11) 0.0207(4) Uani 1 1 d . . . 
H1 H 0.7679 -0.0562 0.5434 0.025 Uiso 1 1 calc R . . 
C14 C 0.72912(11) 0.18528(16) 0.79074(10) 0.0194(4) Uani 1 1 d . . . 
H14A H 0.7001 0.1107 0.7695 0.023 Uiso 1 1 calc R . . 
H14B H 0.7854 0.1834 0.7797 0.023 Uiso 1 1 calc R . . 
C11 C 0.59109(13) 0.37839(18) 0.34920(12) 0.0289(4) Uani 1 1 d . . . 
H11 H 0.5855 0.3713 0.2916 0.035 Uiso 1 1 calc R . . 
O6 O 0.60984(8) 0.10543(12) 0.87724(8) 0.0280(3) Uani 1 1 d . . . 
N4 N 0.73734(10) 0.19304(14) 0.88073(9) 0.0202(3) Uani 1 1 d . . . 
C15 C 0.67336(10) 0.16078(15) 0.91677(11) 0.0175(3) Uani 1 1 d . . . 
C10 C 0.59726(12) 0.49085(18) 0.38679(13) 0.0298(4) Uani 1 1 d . . . 
H10 H 0.5955 0.5606 0.3546 0.036 Uiso 1 1 calc R . . 
N5 N 0.68496(9) 0.19617(14) 0.99807(9) 0.0194(3) Uani 1 1 d . . . 
C16 C 0.63725(11) 0.14755(17) 1.05691(11) 0.0204(4) Uani 1 1 d . . . 
C19 C 0.54253(12) 0.1747(2) 1.02666(13) 0.0311(4) Uani 1 1 d . . . 
H19A H 0.5344 0.2603 1.0181 0.047 Uiso 1 1 calc R . . 
H19B H 0.5136 0.1479 1.0681 0.047 Uiso 1 1 calc R . . 
H19C H 0.5198 0.1330 0.9747 0.047 Uiso 1 1 calc R . . 
C18 C 0.67292(13) 0.21085(19) 1.14065(12) 0.0296(4) Uani 1 1 d . . . 
H18A H 0.7327 0.1935 1.1597 0.044 Uiso 1 1 calc R . . 
H18B H 0.6437 0.1822 1.1814 0.044 Uiso 1 1 calc R . . 
H18C H 0.6648 0.2966 1.1336 0.044 Uiso 1 1 calc R . . 
C17 C 0.65178(13) 0.01106(18) 1.06729(13) 0.0300(4) Uani 1 1 d . . . 
H17A H 0.6311 -0.0281 1.0140 0.045 Uiso 1 1 calc R . . 
H17B H 0.6217 -0.0196 1.1068 0.045 Uiso 1 1 calc R . . 
H17C H 0.7117 -0.0048 1.0876 0.045 Uiso 1 1 calc R . . 
S2 S 0.11270(3) 0.88733(4) 0.64065(3) 0.02769(12) Uani 1 1 d . . . 
O8 O 0.50480(10) 0.95143(12) 0.76429(9) 0.0245(3) Uani 1 1 d . . . 
C6 C 0.76632(10) 0.31461(15) 0.64315(11) 0.0163(3) Uani 1 1 d . . . 
H6A H 0.8004 0.3542 0.6928 0.020 Uiso 1 1 calc R . . 
H6B H 0.7634 0.3685 0.5958 0.020 Uiso 1 1 calc R . . 
C3 C 0.93828(11) 0.09070(18) 0.62758(13) 0.0272(4) Uani 1 1 d . . . 
H3 H 0.9975 0.0853 0.6405 0.033 Uiso 1 1 calc R . . 
C2 C 0.88889(11) -0.00364(17) 0.58699(12) 0.0250(4) Uani 1 1 d . . . 
H2 H 0.9140 -0.0729 0.5715 0.030 Uiso 1 1 calc R . . 
O9 O 0.33368(11) 0.02073(19) 0.71462(12) 0.0506(5) Uani 1 1 d . . . 
C20 C 0.19278(15) 0.7941(2) 0.61572(15) 0.0410(5) Uani 1 1 d . . . 
H20A H 0.2302 0.8428 0.5919 0.061 Uiso 1 1 calc R . . 
H20B H 0.1664 0.7335 0.5758 0.061 Uiso 1 1 calc R . . 
H20C H 0.2250 0.7555 0.6659 0.061 Uiso 1 1 calc R . . 
C21 C 0.06743(15) 0.7805(2) 0.69870(14) 0.0393(5) Uani 1 1 d . . . 
H21A H 0.1113 0.7488 0.7440 0.059 Uiso 1 1 calc R . . 
H21B H 0.0419 0.7155 0.6623 0.059 Uiso 1 1 calc R . . 
H21C H 0.0247 0.8196 0.7211 0.059 Uiso 1 1 calc R . . 
O7 O 0.15762(9) 0.97861(13) 0.70309(10) 0.0384(4) Uani 1 1 d . . . 
H3O H 0.4576(17) 0.971(2) 0.7519(15) 0.032(7) Uiso 1 1 d . . . 
H2O H 0.6028(16) -0.096(2) 0.6303(17) 0.038(7) Uiso 1 1 d . . . 
H4O H 0.5291(15) 1.000(2) 0.7955(15) 0.033(7) Uiso 1 1 d . . . 
H1O H 0.5725(17) -0.041(2) 0.6852(16) 0.043(7) Uiso 1 1 d . . . 
H6O H 0.3292(19) 0.061(3) 0.677(2) 0.056(9) Uiso 1 1 d . . . 
H5O H 0.286(2) 0.009(3) 0.7192(18) 0.058(9) Uiso 1 1 d . . . 
H1N H 0.7324(14) 0.2259(19) 1.0208(13) 0.022(5) Uiso 1 1 d . . . 
H2N H 0.7772(13) 0.2285(18) 0.9083(12) 0.016(5) Uiso 1 1 d . . . 
 
loop_ 
 _atom_site_aniso_label 
 _atom_site_aniso_U_11 
 _atom_site_aniso_U_22 
 _atom_site_aniso_U_33 
 _atom_site_aniso_U_23 
 _atom_site_aniso_U_13 
 _atom_site_aniso_U_12 
Cd1 0.01164(8) 0.01202(8) 0.01540(8) -0.00035(4) 0.00238(5) -0.00029(4) 
S1 0.01161(19) 0.01315(19) 0.0154(2) -0.00089(15) 0.00229(15) 0.00123(14) 
O3 0.0213(6) 0.0175(6) 0.0185(6) 0.0015(5) 0.0045(5) 0.0028(5) 
O2 0.0265(6) 0.0147(6) 0.0177(6) -0.0018(5) 0.0028(5) 0.0001(5) 
O1 0.0205(6) 0.0183(6) 0.0182(6) -0.0003(5) 0.0048(5) -0.0002(5) 
O4 0.0148(6) 0.0250(7) 0.0228(6) 0.0004(5) 0.0057(5) 0.0039(5) 
N3 0.0161(7) 0.0180(7) 0.0168(7) 0.0003(6) 0.0020(6) -0.0001(6) 
O5 0.0127(5) 0.0218(6) 0.0202(6) -0.0050(5) 0.0015(5) -0.0003(5) 
N1 0.0137(7) 0.0163(7) 0.0175(7) -0.0012(5) 0.0034(6) -0.0006(5) 
N2 0.0122(6) 0.0160(7) 0.0141(7) 0.0001(5) 0.0030(5) 0.0008(5) 
C7 0.0187(8) 0.0135(8) 0.0192(9) -0.0020(6) 0.0028(7) 0.0020(6) 
C8 0.0118(8) 0.0167(8) 0.0213(9) 0.0019(7) 0.0025(7) 0.0006(6) 
C5 0.0161(8) 0.0179(8) 0.0133(8) 0.0005(6) 0.0050(6) -0.0012(6) 
C12 0.0231(9) 0.0264(10) 0.0190(9) -0.0004(7) 0.0035(7) -0.0008(7) 
C4 0.0144(8) 0.0250(9) 0.0269(10) -0.0054(7) 0.0037(7) -0.0038(7) 
C13 0.0199(8) 0.0216(9) 0.0144(8) -0.0032(7) 0.0042(7) 0.0006(7) 
C9 0.0213(9) 0.0172(9) 0.0304(10) 0.0037(7) 0.0024(7) 0.0004(7) 
C1 0.0191(8) 0.0179(9) 0.0244(9) -0.0036(7) 0.0040(7) -0.0015(7) 
C14 0.0209(8) 0.0233(9) 0.0139(8) -0.0012(7) 0.0043(7) 0.0004(7) 
C11 0.0290(10) 0.0394(12) 0.0172(10) 0.0073(8) 0.0034(8) 0.0004(8) 
O6 0.0219(7) 0.0393(8) 0.0212(7) -0.0072(6) 0.0018(5) -0.0116(6) 
N4 0.0168(7) 0.0292(8) 0.0133(7) -0.0018(6) 0.0008(6) -0.0061(6) 
C15 0.0164(8) 0.0181(8) 0.0168(9) 0.0008(7) 0.0016(7) -0.0010(7) 
C10 0.0285(10) 0.0275(10) 0.0314(11) 0.0155(8) 0.0037(8) 0.0003(8) 
N5 0.0172(7) 0.0247(8) 0.0158(7) -0.0011(6) 0.0033(6) -0.0089(6) 
C16 0.0189(8) 0.0238(9) 0.0188(9) 0.0014(7) 0.0056(7) -0.0060(7) 
C19 0.0208(9) 0.0458(13) 0.0290(11) 0.0051(9) 0.0105(8) 0.0010(9) 
C18 0.0338(10) 0.0373(11) 0.0194(9) -0.0016(8) 0.0099(8) -0.0117(9) 
C17 0.0333(10) 0.0264(10) 0.0315(11) 0.0047(8) 0.0102(8) -0.0061(8) 
S2 0.0259(2) 0.0268(3) 0.0307(3) 0.00071(19) 0.0072(2) 0.00349(18) 
O8 0.0240(7) 0.0240(7) 0.0246(7) -0.0037(6) 0.0043(6) -0.0013(6) 
C6 0.0145(8) 0.0167(8) 0.0177(8) -0.0016(6) 0.0039(6) -0.0035(6) 
C3 0.0128(8) 0.0314(10) 0.0367(11) -0.0049(9) 0.0048(8) 0.0013(7) 
C2 0.0199(9) 0.0231(9) 0.0327(10) -0.0042(8) 0.0076(8) 0.0044(7) 
O9 0.0270(9) 0.0762(13) 0.0465(11) 0.0356(10) 0.0045(7) -0.0061(8) 
C20 0.0476(13) 0.0340(12) 0.0460(13) -0.0089(10) 0.0202(11) 0.0077(10) 
C21 0.0406(12) 0.0412(12) 0.0348(12) -0.0038(10) 0.0069(9) -0.0168(10) 
O7 0.0378(8) 0.0290(8) 0.0552(10) -0.0138(7) 0.0245(7) -0.0075(6) 
 
_geom_special_details 
; 
 All esds (except the esd in the dihedral angle between two l.s. planes) 
 are estimated using the full covariance matrix.  The cell esds are taken 
 into account individually in the estimation of esds in distances, angles 
 and torsion angles; correlations between esds in cell parameters are only 
 used when they are defined by crystal symmetry.  An approximate (isotropic) 
 treatment of cell esds is used for estimating esds involving l.s. planes. 
; 
 
loop_ 
 _geom_bond_atom_site_label_1 
 _geom_bond_atom_site_label_2 
 _geom_bond_distance 
 _geom_bond_site_symmetry_2 
 _geom_bond_publ_flag 
Cd1 O2 2.2550(12) . ? 
Cd1 O5 2.2605(11) 3_656 ? 
Cd1 O1 2.2987(12) . ? 
Cd1 N3 2.3245(14) . ? 
Cd1 N1 2.3371(14) . ? 
Cd1 N2 2.4530(13) . ? 
S1 O4 1.4644(12) . ? 
S1 O5 1.4781(11) . ? 
S1 O3 1.4783(12) . ? 
S1 O2 1.4843(12) . ? 
N3 C8 1.341(2) . ? 
N3 C12 1.344(2) . ? 
O5 Cd1 2.2605(11) 3_656 ? 
N1 C5 1.340(2) . ? 
N1 C1 1.342(2) . ? 
N2 C7 1.478(2) . ? 
N2 C6 1.479(2) . ? 
N2 C13 1.482(2) . ? 
C7 C8 1.514(3) . ? 
C8 C9 1.387(2) . ? 
C5 C4 1.388(2) . ? 
C5 C6 1.515(2) . ? 
C12 C11 1.377(3) . ? 
C4 C3 1.382(3) . ? 
C13 C14 1.524(2) . ? 
C9 C10 1.381(3) . ? 
C1 C2 1.377(2) . ? 
C14 N4 1.451(2) . ? 
C11 C10 1.379(3) . ? 
O6 C15 1.235(2) . ? 
N4 C15 1.357(2) . ? 
C15 N5 1.357(2) . ? 
N5 C16 1.474(2) . ? 
C16 C19 1.520(2) . ? 
C16 C18 1.524(3) . ? 
C16 C17 1.529(3) . ? 
S2 O7 1.4935(15) . ? 
S2 C20 1.777(2) . ? 
S2 C21 1.780(2) . ? 
C3 C2 1.381(3) . ? 
 
loop_ 
 _geom_angle_atom_site_label_1 
 _geom_angle_atom_site_label_2 
 _geom_angle_atom_site_label_3 
 _geom_angle 
 _geom_angle_site_symmetry_1 
 _geom_angle_site_symmetry_3 
 _geom_angle_publ_flag 
O2 Cd1 O5 111.18(4) . 3_656 ? 
O2 Cd1 O1 89.37(5) . . ? 
O5 Cd1 O1 87.06(5) 3_656 . ? 
O2 Cd1 N3 90.26(5) . . ? 
O5 Cd1 N3 88.29(5) 3_656 . ? 
O1 Cd1 N3 174.85(5) . . ? 
O2 Cd1 N1 92.87(5) . . ? 
O5 Cd1 N1 155.93(5) 3_656 . ? 
O1 Cd1 N1 92.35(5) . . ? 
N3 Cd1 N1 92.79(5) . . ? 
O2 Cd1 N2 155.61(4) . . ? 
O5 Cd1 N2 85.17(4) 3_656 . ? 
O1 Cd1 N2 110.09(5) . . ? 
N3 Cd1 N2 71.66(5) . . ? 
N1 Cd1 N2 72.43(5) . . ? 
O4 S1 O5 108.96(7) . . ? 
O4 S1 O3 109.33(7) . . ? 
O5 S1 O3 109.95(7) . . ? 
O4 S1 O2 109.97(7) . . ? 
O5 S1 O2 108.84(7) . . ? 
O3 S1 O2 109.77(7) . . ? 
S1 O2 Cd1 134.84(7) . . ? 
C8 N3 C12 118.74(15) . . ? 
C8 N3 Cd1 115.57(11) . . ? 
C12 N3 Cd1 125.66(12) . . ? 
S1 O5 Cd1 118.23(7) . 3_656 ? 
C5 N1 C1 118.89(14) . . ? 
C5 N1 Cd1 118.06(11) . . ? 
C1 N1 Cd1 122.87(11) . . ? 
C7 N2 C6 110.19(13) . . ? 
C7 N2 C13 109.40(13) . . ? 
C6 N2 C13 110.97(12) . . ? 
C7 N2 Cd1 101.86(9) . . ? 
C6 N2 Cd1 109.19(9) . . ? 
C13 N2 Cd1 114.85(10) . . ? 
N2 C7 C8 111.79(13) . . ? 
N3 C8 C9 122.14(17) . . ? 
N3 C8 C7 116.60(14) . . ? 
C9 C8 C7 121.26(15) . . ? 
N1 C5 C4 121.69(15) . . ? 
N1 C5 C6 118.25(14) . . ? 
C4 C5 C6 119.94(15) . . ? 
N3 C12 C11 122.18(18) . . ? 
C3 C4 C5 118.75(16) . . ? 
N2 C13 C14 112.91(13) . . ? 
C10 C9 C8 118.49(17) . . ? 
N1 C1 C2 122.69(16) . . ? 
N4 C14 C13 111.28(14) . . ? 
C12 C11 C10 118.95(18) . . ? 
C15 N4 C14 122.38(15) . . ? 
O6 C15 N4 121.71(16) . . ? 
O6 C15 N5 123.86(16) . . ? 
N4 C15 N5 114.42(15) . . ? 
C11 C10 C9 119.47(17) . . ? 
C15 N5 C16 124.59(15) . . ? 
N5 C16 C19 111.07(15) . . ? 
N5 C16 C18 106.19(14) . . ? 
C19 C16 C18 109.53(16) . . ? 
N5 C16 C17 109.97(15) . . ? 
C19 C16 C17 110.25(16) . . ? 
C18 C16 C17 109.75(16) . . ? 
O7 S2 C20 106.80(10) . . ? 
O7 S2 C21 105.99(10) . . ? 
C20 S2 C21 98.92(12) . . ? 
N2 C6 C5 114.17(13) . . ? 
C2 C3 C4 119.64(16) . . ? 
C1 C2 C3 118.30(17) . . ? 
 
_diffrn_measured_fraction_theta_max    0.999 
_diffrn_reflns_theta_full              25.00 
_diffrn_measured_fraction_theta_full   0.999 
_refine_diff_density_max    0.350 
_refine_diff_density_min   -0.280 
_refine_diff_density_rms    0.074 
#END
 
data_Complex5 
 
_audit_creation_method            SHELXL-97 
_chemical_name_systematic 
; 
 ? 
; 
_chemical_name_common             ? 
_chemical_melting_point           ? 
_chemical_formula_moiety          ? 
_chemical_formula_sum 
 'C21 H27 F6 N5 O8 S2 Zn' 
_chemical_formula_weight          720.97 
 
loop_ 
 _atom_type_symbol 
 _atom_type_description 
 _atom_type_scat_dispersion_real 
 _atom_type_scat_dispersion_imag 
 _atom_type_scat_source 
 'C'  'C'   0.0033   0.0016 
 'International Tables Vol C Tables 4.2.6.8 and 6.1.1.4' 
 'H'  'H'   0.0000   0.0000 
 'International Tables Vol C Tables 4.2.6.8 and 6.1.1.4' 
 'N'  'N'   0.0061   0.0033 
 'International Tables Vol C Tables 4.2.6.8 and 6.1.1.4' 
 'O'  'O'   0.0106   0.0060 
 'International Tables Vol C Tables 4.2.6.8 and 6.1.1.4' 
 'F'  'F'   0.0171   0.0103 
 'International Tables Vol C Tables 4.2.6.8 and 6.1.1.4' 
 'S'  'S'   0.1246   0.1234 
 'International Tables Vol C Tables 4.2.6.8 and 6.1.1.4' 
 'Zn'  'Zn'   0.2839   1.4301 
 'International Tables Vol C Tables 4.2.6.8 and 6.1.1.4' 
 
_symmetry_cell_setting            'Triclinic' 
_symmetry_space_group_name_H-M    'P-1' 
 
loop_ 
 _symmetry_equiv_pos_as_xyz 
 'x, y, z' 
 '-x, -y, -z' 
 
_cell_length_a                    10.272(2) 
_cell_length_b                    12.289(2) 
_cell_length_c                    14.188(3) 
_cell_angle_alpha                 65.551(4) 
_cell_angle_beta                  71.476(4) 
_cell_angle_gamma                 68.979(4) 
_cell_volume                      1491.4(5) 
_cell_formula_units_Z             2 
_cell_measurement_temperature     150(2) 
_cell_measurement_reflns_used     6624
_cell_measurement_theta_min       2.29 
_cell_measurement_theta_max       28.93 
 
_exptl_crystal_description        'block' 
_exptl_crystal_colour             'colourless' 
_exptl_crystal_size_max           0.26 
_exptl_crystal_size_mid           0.18 
_exptl_crystal_size_min           0.14 
_exptl_crystal_density_meas       ? 
_exptl_crystal_density_diffrn     1.605 
_exptl_crystal_density_method     'not measured' 
_exptl_crystal_F_000              736 
_exptl_absorpt_coefficient_mu     1.053 
_exptl_absorpt_correction_type    'MULTI-SCAN'
_exptl_absorpt_correction_T_min   0.7715 
_exptl_absorpt_correction_T_max   0.8666 
_exptl_absorpt_process_details    'SADABS' 
 
_exptl_special_details 
; 
 ? 
; 
 
_diffrn_ambient_temperature       150(2) 
_diffrn_radiation_wavelength      0.71073 
_diffrn_radiation_type            MoK\a 
_diffrn_radiation_source          'fine-focus sealed tube' 
_diffrn_radiation_monochromator   graphite 
_diffrn_measurement_device_type   'Bruker APEX-II CCD'  
_diffrn_measurement_method        '\f and \w scans' 
_diffrn_detector_area_resol_mean  ? 
_diffrn_reflns_number             13483 
_diffrn_reflns_av_R_equivalents   0.0362 
_diffrn_reflns_av_sigmaI/netI     0.0440 
_diffrn_reflns_limit_h_min        -11 
_diffrn_reflns_limit_h_max        12 
_diffrn_reflns_limit_k_min        -14 
_diffrn_reflns_limit_k_max        14 
_diffrn_reflns_limit_l_min        -16 
_diffrn_reflns_limit_l_max        16 
_diffrn_reflns_theta_min          1.61 
_diffrn_reflns_theta_max          25.00 
_reflns_number_total              5242 
_reflns_number_gt                 4524 
_reflns_threshold_expression      >2sigma(I) 
 
_computing_data_collection        'Bruker APEX2' 
_computing_cell_refinement        'Bruker SAINT' 
_computing_data_reduction         'Bruker SAINT'  
_computing_structure_solution     'SHELXS-97 (Sheldrick, 2008)' 
_computing_structure_refinement   'SHELXL-97 (Sheldrick, 2008)' 
_computing_molecular_graphics     'MERCURY 3.2' 
_computing_publication_material   'ORTEP 3V.2' 
 
_refine_special_details 
; 
 Refinement of F^2^ against ALL reflections.  The weighted R-factor wR and 
 goodness of fit S are based on F^2^, conventional R-factors R are based 
 on F, with F set to zero for negative F^2^. The threshold expression of 
 F^2^ > 2sigma(F^2^) is used only for calculating R-factors(gt) etc. and is 
 not relevant to the choice of reflections for refinement.  R-factors based 
 on F^2^ are statistically about twice as large as those based on F, and R- 
 factors based on ALL data will be even larger. 
; 
 
_refine_ls_structure_factor_coef  Fsqd  
_refine_ls_matrix_type            full 
_refine_ls_weighting_scheme       calc  
_refine_ls_weighting_details 
 'calc w=1/[\s^2^(Fo^2^)+(0.0435P)^2^+0.8428P] where P=(Fo^2^+2Fc^2^)/3' 
_atom_sites_solution_primary      direct 
_atom_sites_solution_secondary    difmap 
_atom_sites_solution_hydrogens    geom 
_refine_ls_hydrogen_treatment     mixed 
_refine_ls_extinction_method      none 
_refine_ls_extinction_coef        ? 
_refine_ls_number_reflns          5242 
_refine_ls_number_parameters      391 
_refine_ls_number_restraints      0 
_refine_ls_R_factor_all           0.0399 
_refine_ls_R_factor_gt            0.0328 
_refine_ls_wR_factor_ref          0.0898 
_refine_ls_wR_factor_gt           0.0856 
_refine_ls_goodness_of_fit_ref    1.050 
_refine_ls_restrained_S_all       1.050 
_refine_ls_shift/su_max           0.001 
_refine_ls_shift/su_mean          0.000 
 
loop_ 
 _atom_site_label 
 _atom_site_type_symbol 
 _atom_site_fract_x 
 _atom_site_fract_y 
 _atom_site_fract_z 
 _atom_site_U_iso_or_equiv 
 _atom_site_adp_type 
 _atom_site_occupancy 
 _atom_site_symmetry_multiplicity 
 _atom_site_calc_flag 
 _atom_site_refinement_flags 
 _atom_site_disorder_assembly 
 _atom_site_disorder_group 
Zn1 Zn 0.76065(3) 0.64288(2) 0.11785(2) 0.01512(10) Uani 1 1 d . . . 
S2 S 0.31098(6) 0.74519(6) 0.16366(5) 0.01975(15) Uani 1 1 d . . . 
S3 S 0.69167(7) 0.17744(6) 0.34739(5) 0.02004(15) Uani 1 1 d . . . 
N1 N 0.8338(2) 0.81641(18) 0.02762(16) 0.0160(4) Uani 1 1 d . . . 
N2 N 0.6725(2) 0.71227(19) -0.01447(16) 0.0183(4) Uani 1 1 d . . . 
N3 N 0.6960(2) 0.72419(18) 0.23140(16) 0.0174(4) Uani 1 1 d . . . 
N4 N 1.1130(2) 0.62822(19) 0.05571(16) 0.0190(5) Uani 1 1 d . . . 
H4 H 1.1831 0.6482 0.0592 0.023 Uiso 1 1 calc R . . 
N5 N 1.1201(2) 0.49299(19) 0.22520(16) 0.0188(5) Uani 1 1 d . . . 
H5 H 1.1966 0.5124 0.2165 0.023 Uiso 1 1 calc R . . 
C1 C 0.6561(3) 0.8351(2) -0.0647(2) 0.0193(5) Uani 1 1 d . . . 
C2 C 0.5907(3) 0.8991(2) -0.1511(2) 0.0245(6) Uani 1 1 d . . . 
H2 H 0.5819 0.9836 -0.1854 0.029 Uiso 1 1 calc R . . 
C3 C 0.5384(3) 0.8360(3) -0.1859(2) 0.0314(7) Uani 1 1 d . . . 
H3 H 0.4939 0.8774 -0.2437 0.038 Uiso 1 1 calc R . . 
C4 C 0.5536(3) 0.7101(3) -0.1332(2) 0.0286(6) Uani 1 1 d . . . 
H4A H 0.5184 0.6658 -0.1546 0.034 Uiso 1 1 calc R . . 
C5 C 0.6219(3) 0.6512(2) -0.0485(2) 0.0229(6) Uani 1 1 d . . . 
H5A H 0.6331 0.5665 -0.0139 0.027 Uiso 1 1 calc R . . 
C6 C 0.7050(3) 0.8992(2) -0.0165(2) 0.0188(5) Uani 1 1 d . . . 
H6A H 0.7264 0.9746 -0.0701 0.023 Uiso 1 1 calc R . . 
H6B H 0.6293 0.9217 0.0391 0.023 Uiso 1 1 calc R . . 
C7 C 0.8502(3) 0.8581(2) 0.10652(19) 0.0174(5) Uani 1 1 d . . . 
H7A H 0.8326 0.9475 0.0793 0.021 Uiso 1 1 calc R . . 
H7B H 0.9472 0.8225 0.1179 0.021 Uiso 1 1 calc R . . 
C8 C 0.7483(2) 0.8201(2) 0.21081(19) 0.0172(5) Uani 1 1 d . . . 
C9 C 0.7128(3) 0.8800(2) 0.2832(2) 0.0212(6) Uani 1 1 d . . . 
H9 H 0.7496 0.9459 0.2676 0.025 Uiso 1 1 calc R . . 
C10 C 0.6224(3) 0.8410(3) 0.3788(2) 0.0268(6) Uani 1 1 d . . . 
H10 H 0.5982 0.8799 0.4282 0.032 Uiso 1 1 calc R . . 
C11 C 0.5681(3) 0.7426(3) 0.4000(2) 0.0257(6) Uani 1 1 d . . . 
H11 H 0.5069 0.7148 0.4636 0.031 Uiso 1 1 calc R . . 
C12 C 0.6071(3) 0.6874(2) 0.3245(2) 0.0207(5) Uani 1 1 d . . . 
H12 H 0.5706 0.6219 0.3384 0.025 Uiso 1 1 calc R . . 
C13 C 0.9628(3) 0.8133(2) -0.05942(19) 0.0186(5) Uani 1 1 d . . . 
H13A H 1.0134 0.8688 -0.0635 0.022 Uiso 1 1 calc R . . 
H13B H 0.9329 0.8433 -0.1261 0.022 Uiso 1 1 calc R . . 
C14 C 1.0632(3) 0.6843(2) -0.0434(2) 0.0202(5) Uani 1 1 d . . . 
H14A H 1.0150 0.6311 -0.0461 0.024 Uiso 1 1 calc R . . 
H14B H 1.1450 0.6886 -0.1012 0.024 Uiso 1 1 calc R . . 
C15 C 1.0544(2) 0.5459(2) 0.14318(19) 0.0169(5) Uani 1 1 d . . . 
C16 C 1.0736(3) 0.4035(2) 0.3303(2) 0.0233(6) Uani 1 1 d . . . 
C17 C 1.1848(3) 0.3731(3) 0.3949(2) 0.0325(7) Uani 1 1 d . . . 
H17A H 1.2768 0.3358 0.3607 0.049 Uiso 1 1 calc R . . 
H17B H 1.1600 0.3166 0.4645 0.049 Uiso 1 1 calc R . . 
H17C H 1.1870 0.4480 0.3999 0.049 Uiso 1 1 calc R . . 
C18 C 1.0727(3) 0.2862(3) 0.3183(2) 0.0322(7) Uani 1 1 d . . . 
H18A H 1.0025 0.3059 0.2782 0.048 Uiso 1 1 calc R . . 
H18B H 1.0502 0.2269 0.3868 0.048 Uiso 1 1 calc R . . 
H18C H 1.1648 0.2517 0.2821 0.048 Uiso 1 1 calc R . . 
C19 C 0.9267(3) 0.4637(3) 0.3834(2) 0.0333(7) Uani 1 1 d . . . 
H19A H 0.9268 0.5420 0.3830 0.050 Uiso 1 1 calc R . . 
H19B H 0.9041 0.4106 0.4549 0.050 Uiso 1 1 calc R . . 
H19C H 0.8569 0.4765 0.3455 0.050 Uiso 1 1 calc R . . 
F1 F 0.2539(2) 0.7129(2) 0.36510(14) 0.0540(5) Uani 1 1 d . . . 
O1 O 0.94536(17) 0.51875(15) 0.14427(13) 0.0167(4) Uani 1 1 d . . . 
O2 O 0.42259(18) 0.79957(16) 0.14876(14) 0.0239(4) Uani 1 1 d . . . 
O3 O 0.22245(19) 0.80705(17) 0.08572(15) 0.0278(4) Uani 1 1 d . . . 
O6 O 0.7608(2) 0.15236(18) 0.25052(15) 0.0323(5) Uani 1 1 d . . . 
O4 O 0.35554(19) 0.61028(17) 0.19158(17) 0.0304(5) Uani 1 1 d . . . 
O7 O 0.5536(2) 0.1536(2) 0.39265(15) 0.0323(5) Uani 1 1 d . . . 
O5 O 0.7000(2) 0.29275(17) 0.34817(17) 0.0346(5) Uani 1 1 d . . . 
F4 F 0.07679(18) 0.72520(17) 0.30774(15) 0.0431(5) Uani 1 1 d . . . 
F5 F 0.1419(2) 0.88961(17) 0.27020(16) 0.0564(6) Uani 1 1 d . . . 
F2 F 0.9381(2) 0.06113(19) 0.40503(19) 0.0592(6) Uani 1 1 d . . . 
F3 F 0.7975(2) -0.05283(15) 0.45634(17) 0.0533(6) Uani 1 1 d . . . 
C20 C 0.1895(3) 0.7696(3) 0.2832(2) 0.0316(7) Uani 1 1 d . . . 
O8 O 0.64848(18) 0.50848(16) 0.18954(14) 0.0228(4) Uani 1 1 d . . . 
F6 F 0.7604(3) 0.07611(19) 0.53373(16) 0.0608(6) Uani 1 1 d . . . 
C21 C 0.8021(3) 0.0598(2) 0.4415(2) 0.0319(7) Uani 1 1 d . . . 
 
loop_ 
 _atom_site_aniso_label 
 _atom_site_aniso_U_11 
 _atom_site_aniso_U_22 
 _atom_site_aniso_U_33 
 _atom_site_aniso_U_23 
 _atom_site_aniso_U_13 
 _atom_site_aniso_U_12 
Zn1 0.01449(16) 0.01304(16) 0.01750(17) -0.00562(12) -0.00328(11) -0.00265(11) 
S2 0.0147(3) 0.0174(3) 0.0261(4) -0.0065(3) -0.0033(3) -0.0048(2) 
S3 0.0225(3) 0.0169(3) 0.0193(3) -0.0034(3) -0.0059(3) -0.0053(3) 
N1 0.0161(10) 0.0157(10) 0.0159(11) -0.0063(8) -0.0031(8) -0.0028(8) 
N2 0.0145(10) 0.0173(11) 0.0223(11) -0.0091(9) -0.0037(9) -0.0004(8) 
N3 0.0151(10) 0.0162(10) 0.0196(11) -0.0061(9) -0.0055(8) -0.0010(8) 
N4 0.0161(11) 0.0182(11) 0.0218(11) -0.0043(9) -0.0034(9) -0.0067(9) 
N5 0.0132(10) 0.0203(11) 0.0225(12) -0.0056(9) -0.0036(9) -0.0057(9) 
C1 0.0134(12) 0.0203(13) 0.0213(13) -0.0102(11) -0.0004(10) -0.0002(10) 
C2 0.0257(14) 0.0215(14) 0.0227(14) -0.0083(11) -0.0079(11) 0.0015(11) 
C3 0.0319(16) 0.0331(16) 0.0314(16) -0.0141(13) -0.0175(13) 0.0027(13) 
C4 0.0244(14) 0.0343(16) 0.0363(17) -0.0212(14) -0.0124(12) -0.0015(12) 
C5 0.0197(13) 0.0206(13) 0.0296(15) -0.0133(12) -0.0042(11) -0.0017(11) 
C6 0.0195(13) 0.0151(12) 0.0214(13) -0.0071(10) -0.0071(10) -0.0004(10) 
C7 0.0193(13) 0.0147(12) 0.0206(13) -0.0069(10) -0.0049(10) -0.0052(10) 
C8 0.0142(12) 0.0157(12) 0.0196(13) -0.0056(10) -0.0052(10) -0.0005(10) 
C9 0.0232(14) 0.0207(13) 0.0235(14) -0.0113(11) -0.0062(11) -0.0042(11) 
C10 0.0266(15) 0.0325(15) 0.0244(15) -0.0167(12) -0.0032(12) -0.0043(12) 
C11 0.0212(14) 0.0330(15) 0.0199(14) -0.0111(12) 0.0017(11) -0.0064(12) 
C12 0.0188(13) 0.0213(13) 0.0213(14) -0.0076(11) -0.0024(10) -0.0054(10) 
C13 0.0204(13) 0.0190(13) 0.0147(12) -0.0046(10) 0.0000(10) -0.0079(10) 
C14 0.0203(13) 0.0206(13) 0.0183(13) -0.0088(11) 0.0013(10) -0.0056(10) 
C15 0.0139(12) 0.0135(12) 0.0217(13) -0.0097(10) -0.0003(10) -0.0003(10) 
C16 0.0234(14) 0.0196(13) 0.0225(14) 0.0008(11) -0.0080(11) -0.0071(11) 
C17 0.0346(16) 0.0321(16) 0.0286(16) -0.0014(13) -0.0148(13) -0.0095(13) 
C18 0.0314(16) 0.0201(14) 0.0428(18) -0.0005(13) -0.0162(14) -0.0085(12) 
C19 0.0287(16) 0.0364(17) 0.0198(14) -0.0009(13) 0.0009(12) -0.0070(13) 
F1 0.0544(12) 0.0830(16) 0.0253(10) -0.0090(10) -0.0037(9) -0.0336(11) 
O1 0.0128(8) 0.0143(8) 0.0218(9) -0.0056(7) -0.0027(7) -0.0036(7) 
O2 0.0194(9) 0.0216(9) 0.0296(10) -0.0051(8) -0.0047(8) -0.0085(8) 
O3 0.0239(10) 0.0302(10) 0.0308(11) -0.0081(9) -0.0100(8) -0.0075(8) 
O6 0.0379(12) 0.0323(11) 0.0218(10) -0.0083(9) 0.0041(9) -0.0136(9) 
O4 0.0180(10) 0.0181(10) 0.0512(13) -0.0100(9) -0.0045(9) -0.0044(8) 
O7 0.0228(10) 0.0492(13) 0.0257(11) -0.0140(10) -0.0016(8) -0.0118(9) 
O5 0.0496(13) 0.0163(10) 0.0407(12) -0.0042(9) -0.0244(10) -0.0047(9) 
F4 0.0244(9) 0.0501(11) 0.0503(11) -0.0185(9) 0.0101(8) -0.0180(8) 
F5 0.0635(13) 0.0376(11) 0.0594(13) -0.0315(10) 0.0206(11) -0.0145(10) 
F2 0.0329(11) 0.0459(12) 0.0989(18) -0.0157(12) -0.0347(11) -0.0021(9) 
F3 0.0807(15) 0.0184(9) 0.0676(14) 0.0053(9) -0.0490(12) -0.0143(9) 
C20 0.0300(16) 0.0328(16) 0.0308(16) -0.0105(13) 0.0021(13) -0.0144(13) 
O8 0.0192(9) 0.0183(9) 0.0300(10) -0.0056(8) -0.0056(8) -0.0062(7) 
F6 0.0865(16) 0.0565(13) 0.0424(12) -0.0157(10) -0.0427(12) 0.0026(12) 
C21 0.0382(17) 0.0182(14) 0.0420(19) -0.0040(13) -0.0219(14) -0.0055(12) 
 
_geom_special_details 
; 
 All esds (except the esd in the dihedral angle between two l.s. planes) 
 are estimated using the full covariance matrix.  The cell esds are taken 
 into account individually in the estimation of esds in distances, angles 
 and torsion angles; correlations between esds in cell parameters are only 
 used when they are defined by crystal symmetry.  An approximate (isotropic) 
 treatment of cell esds is used for estimating esds involving l.s. planes. 
; 
 
loop_ 
 _geom_bond_atom_site_label_1 
 _geom_bond_atom_site_label_2 
 _geom_bond_distance 
 _geom_bond_site_symmetry_2 
 _geom_bond_publ_flag 
Zn1 O1 1.9923(16) . ? 
Zn1 N3 2.052(2) . ? 
Zn1 N2 2.067(2) . ? 
Zn1 O8 2.0784(17) . ? 
Zn1 N1 2.243(2) . ? 
S2 O3 1.4405(19) . ? 
S2 O2 1.4437(18) . ? 
S2 O4 1.4635(19) . ? 
S2 C20 1.825(3) . ? 
S3 O6 1.436(2) . ? 
S3 O7 1.440(2) . ? 
S3 O5 1.455(2) . ? 
S3 C21 1.829(3) . ? 
N1 C7 1.483(3) . ? 
N1 C6 1.487(3) . ? 
N1 C13 1.499(3) . ? 
N2 C5 1.343(3) . ? 
N2 C1 1.348(3) . ? 
N3 C12 1.348(3) . ? 
N3 C8 1.354(3) . ? 
N4 C15 1.360(3) . ? 
N4 C14 1.454(3) . ? 
N5 C15 1.338(3) . ? 
N5 C16 1.493(3) . ? 
C1 C2 1.386(4) . ? 
C1 C6 1.512(3) . ? 
C2 C3 1.384(4) . ? 
C3 C4 1.386(4) . ? 
C4 C5 1.383(4) . ? 
C7 C8 1.515(3) . ? 
C8 C9 1.388(3) . ? 
C9 C10 1.383(4) . ? 
C10 C11 1.392(4) . ? 
C11 C12 1.379(4) . ? 
C13 C14 1.519(3) . ? 
C15 O1 1.272(3) . ? 
C16 C18 1.524(4) . ? 
C16 C19 1.526(4) . ? 
C16 C17 1.536(4) . ? 
F1 C20 1.327(4) . ? 
F4 C20 1.341(3) . ? 
F5 C20 1.328(3) . ? 
F2 C21 1.331(4) . ? 
F3 C21 1.327(3) . ? 
F6 C21 1.318(4) . ? 
 
loop_ 
 _geom_angle_atom_site_label_1 
 _geom_angle_atom_site_label_2 
 _geom_angle_atom_site_label_3 
 _geom_angle 
 _geom_angle_site_symmetry_1 
 _geom_angle_site_symmetry_3 
 _geom_angle_publ_flag 
O1 Zn1 N3 105.70(7) . . ? 
O1 Zn1 N2 128.59(7) . . ? 
N3 Zn1 N2 124.03(8) . . ? 
O1 Zn1 O8 92.79(7) . . ? 
N3 Zn1 O8 100.15(8) . . ? 
N2 Zn1 O8 90.71(8) . . ? 
O1 Zn1 N1 100.44(7) . . ? 
N3 Zn1 N1 79.00(8) . . ? 
N2 Zn1 N1 78.94(8) . . ? 
O8 Zn1 N1 166.49(7) . . ? 
O3 S2 O2 116.26(11) . . ? 
O3 S2 O4 113.50(12) . . ? 
O2 S2 O4 114.34(11) . . ? 
O3 S2 C20 103.33(13) . . ? 
O2 S2 C20 103.62(12) . . ? 
O4 S2 C20 103.64(13) . . ? 
O6 S3 O7 114.83(12) . . ? 
O6 S3 O5 114.99(12) . . ? 
O7 S3 O5 114.56(13) . . ? 
O6 S3 C21 103.66(13) . . ? 
O7 S3 C21 103.80(13) . . ? 
O5 S3 C21 102.77(12) . . ? 
C7 N1 C6 109.89(18) . . ? 
C7 N1 C13 111.42(18) . . ? 
C6 N1 C13 110.26(19) . . ? 
C7 N1 Zn1 106.90(14) . . ? 
C6 N1 Zn1 99.23(14) . . ? 
C13 N1 Zn1 118.36(14) . . ? 
C5 N2 C1 118.8(2) . . ? 
C5 N2 Zn1 127.32(17) . . ? 
C1 N2 Zn1 113.61(16) . . ? 
C12 N3 C8 118.6(2) . . ? 
C12 N3 Zn1 124.34(17) . . ? 
C8 N3 Zn1 117.05(16) . . ? 
C15 N4 C14 123.4(2) . . ? 
C15 N5 C16 126.4(2) . . ? 
N2 C1 C2 121.7(2) . . ? 
N2 C1 C6 115.8(2) . . ? 
C2 C1 C6 122.4(2) . . ? 
C3 C2 C1 119.3(2) . . ? 
C2 C3 C4 118.9(3) . . ? 
C5 C4 C3 119.0(3) . . ? 
N2 C5 C4 122.2(2) . . ? 
N1 C6 C1 110.43(19) . . ? 
N1 C7 C8 111.56(19) . . ? 
N3 C8 C9 121.5(2) . . ? 
N3 C8 C7 117.5(2) . . ? 
C9 C8 C7 121.0(2) . . ? 
C10 C9 C8 119.5(2) . . ? 
C9 C10 C11 119.1(2) . . ? 
C12 C11 C10 118.5(3) . . ? 
N3 C12 C11 122.8(2) . . ? 
N1 C13 C14 112.6(2) . . ? 
N4 C14 C13 114.2(2) . . ? 
O1 C15 N5 122.5(2) . . ? 
O1 C15 N4 120.8(2) . . ? 
N5 C15 N4 116.6(2) . . ? 
N5 C16 C18 110.5(2) . . ? 
N5 C16 C19 110.1(2) . . ? 
C18 C16 C19 110.8(2) . . ? 
N5 C16 C17 105.1(2) . . ? 
C18 C16 C17 110.1(2) . . ? 
C19 C16 C17 110.1(2) . . ? 
C15 O1 Zn1 123.80(15) . . ? 
F1 C20 F5 108.2(3) . . ? 
F1 C20 F4 107.6(2) . . ? 
F5 C20 F4 108.0(2) . . ? 
F1 C20 S2 111.1(2) . . ? 
F5 C20 S2 110.5(2) . . ? 
F4 C20 S2 111.3(2) . . ? 
F6 C21 F3 108.4(3) . . ? 
F6 C21 F2 108.5(2) . . ? 
F3 C21 F2 106.2(2) . . ? 
F6 C21 S3 111.8(2) . . ? 
F3 C21 S3 110.64(19) . . ? 
F2 C21 S3 111.1(2) . . ? 
 
_diffrn_measured_fraction_theta_max    0.998 
_diffrn_reflns_theta_full              25.00 
_diffrn_measured_fraction_theta_full   0.998 
_refine_diff_density_max    0.687 
_refine_diff_density_min   -0.537 
_refine_diff_density_rms    0.069 
#END
 
data_Complex3  
 
_audit_creation_method            SHELXL-97 
_chemical_name_systematic 
; 
 ? 
; 
_chemical_name_common             ? 
_chemical_melting_point           ? 
_chemical_formula_moiety          ? 
_chemical_formula_sum 
 'C42 H66 Co2 N10 O18 S4' 
_chemical_formula_weight          1245.15 
 
loop_ 
 _atom_type_symbol 
 _atom_type_description 
 _atom_type_scat_dispersion_real 
 _atom_type_scat_dispersion_imag 
 _atom_type_scat_source 
 'C'  'C'   0.0033   0.0016 
 'International Tables Vol C Tables 4.2.6.8 and 6.1.1.4' 
 'H'  'H'   0.0000   0.0000 
 'International Tables Vol C Tables 4.2.6.8 and 6.1.1.4' 
 'N'  'N'   0.0061   0.0033 
 'International Tables Vol C Tables 4.2.6.8 and 6.1.1.4' 
 'O'  'O'   0.0106   0.0060 
 'International Tables Vol C Tables 4.2.6.8 and 6.1.1.4' 
 'S'  'S'   0.1246   0.1234 
 'International Tables Vol C Tables 4.2.6.8 and 6.1.1.4' 
 'Co'  'Co'   0.3494   0.9721 
 'International Tables Vol C Tables 4.2.6.8 and 6.1.1.4' 
 
_symmetry_cell_setting            'Monoclinic' 
_symmetry_space_group_name_H-M    'P2(1)/n' 
 
loop_ 
 _symmetry_equiv_pos_as_xyz 
 'x, y, z' 
 '-x+1/2, y+1/2, -z+1/2' 
 '-x, -y, -z' 
 'x-1/2, -y-1/2, z-1/2' 
 
_cell_length_a                    16.0294(11) 
_cell_length_b                    10.8894(8) 
_cell_length_c                    16.4207(12) 
_cell_angle_alpha                 90.00 
_cell_angle_beta                  104.5296(16) 
_cell_angle_gamma                 90.00 
_cell_volume                      2774.6(3) 
_cell_formula_units_Z             2 
_cell_measurement_temperature     150(2) 
_cell_measurement_reflns_used     9234 
_cell_measurement_theta_min       2.27 
_cell_measurement_theta_max       28.49 
 
_exptl_crystal_description        'BLOCK' 
_exptl_crystal_colour             'PINK' 
_exptl_crystal_size_max           0.24 
_exptl_crystal_size_mid           0.16 
_exptl_crystal_size_min           0.12 
_exptl_crystal_density_meas       ? 
_exptl_crystal_density_diffrn     1.490 
_exptl_crystal_density_method     'not measured' 
_exptl_crystal_F_000              1300 
_exptl_absorpt_coefficient_mu     0.826 
_exptl_absorpt_correction_type    'MULTI-SCAN' 
_exptl_absorpt_correction_T_min   0.8265 
_exptl_absorpt_correction_T_max   0.9074 
_exptl_absorpt_process_details    'SADABS' 
 
_exptl_special_details 
; 
 ? 
; 
 
_diffrn_ambient_temperature       150(2) 
_diffrn_radiation_wavelength      0.71073 
_diffrn_radiation_type            MoK\a 
_diffrn_radiation_source          'fine-focus sealed tube' 
_diffrn_radiation_monochromator   graphite 
_diffrn_measurement_device_type   'Bruker APEX-II CCD' 
_diffrn_measurement_method        '\f and \w scans' 
_diffrn_detector_area_resol_mean  ? 
_diffrn_reflns_number             32372 
_diffrn_reflns_av_R_equivalents   0.0409 
_diffrn_reflns_av_sigmaI/netI     0.0253 
_diffrn_reflns_limit_h_min        -19 
_diffrn_reflns_limit_h_max        19 
_diffrn_reflns_limit_k_min        -12 
_diffrn_reflns_limit_k_max        12 
_diffrn_reflns_limit_l_min        -18 
_diffrn_reflns_limit_l_max        19 
_diffrn_reflns_theta_min          1.59 
_diffrn_reflns_theta_max          25.00 
_reflns_number_total              4865 
_reflns_number_gt                 4123 
_reflns_threshold_expression      >2sigma(I) 
 
_computing_data_collection        'Bruker APEX2' 
_computing_cell_refinement        'Bruker SAINT' 
_computing_data_reduction         'Bruker SAINT' 
_computing_structure_solution     'SHELXS-97 (Sheldrick, 2008)' 
_computing_structure_refinement   'SHELXL-97 (Sheldrick, 2008)' 
_computing_molecular_graphics     'MERCURY 3.2' 
_computing_publication_material   'ORTEP 3V.2' 
 
_refine_special_details 
; 
 Refinement of F^2^ against ALL reflections.  The weighted R-factor wR and 
 goodness of fit S are based on F^2^, conventional R-factors R are based 
 on F, with F set to zero for negative F^2^. The threshold expression of 
 F^2^ > 2sigma(F^2^) is used only for calculating R-factors(gt) etc. and is 
 not relevant to the choice of reflections for refinement.  R-factors based 
 on F^2^ are statistically about twice as large as those based on F, and R- 
 factors based on ALL data will be even larger. 
; 
 
_refine_ls_structure_factor_coef  Fsqd  
_refine_ls_matrix_type            full 
_refine_ls_weighting_scheme       calc  
_refine_ls_weighting_details 
 'calc w=1/[\s^2^(Fo^2^)+(0.1000P)^2^+0.0000P] where P=(Fo^2^+2Fc^2^)/3' 
_atom_sites_solution_primary      direct 
_atom_sites_solution_secondary    difmap 
_atom_sites_solution_hydrogens    geom 
_refine_ls_hydrogen_treatment     mixed 
_refine_ls_extinction_method      none 
_refine_ls_extinction_coef        ? 
_refine_ls_number_reflns          4865 
_refine_ls_number_parameters      348 
_refine_ls_number_restraints      0 
_refine_ls_R_factor_all           0.0438 
_refine_ls_R_factor_gt            0.0356 
_refine_ls_wR_factor_ref          0.1363 
_refine_ls_wR_factor_gt           0.1243 
_refine_ls_goodness_of_fit_ref    1.094 
_refine_ls_restrained_S_all       1.094 
_refine_ls_shift/su_max           0.008 
_refine_ls_shift/su_mean          0.001 
 
loop_ 
 _atom_site_label 
 _atom_site_type_symbol 
 _atom_site_fract_x 
 _atom_site_fract_y 
 _atom_site_fract_z 
 _atom_site_U_iso_or_equiv 
 _atom_site_adp_type 
 _atom_site_occupancy 
 _atom_site_symmetry_multiplicity 
 _atom_site_calc_flag 
 _atom_site_refinement_flags 
 _atom_site_disorder_assembly 
 _atom_site_disorder_group 
Co1 Co 0.12150(2) 0.62444(3) 0.07311(2) 0.01296(15) Uani 1 1 d . . . 
S2 S 0.08394(4) 0.36493(5) -0.03970(4) 0.01334(18) Uani 1 1 d . . . 
S3 S 0.61192(5) 0.39170(7) 0.14074(5) 0.0284(2) Uani 1 1 d . . . 
C7 C 0.11647(17) 0.8877(2) 0.11489(16) 0.0176(6) Uani 1 1 d . . . 
H7A H 0.1407 0.9656 0.1381 0.021 Uiso 1 1 calc R . . 
H7B H 0.0600 0.8791 0.1258 0.021 Uiso 1 1 calc R . . 
C12 C 0.09940(17) 0.7647(2) -0.09568(16) 0.0207(6) Uani 1 1 d . . . 
H12 H 0.0968 0.6873 -0.1201 0.025 Uiso 1 1 calc R . . 
C16 C 0.14028(17) 0.6502(3) 0.56250(17) 0.0210(6) Uani 1 1 d . . . 
C10 C 0.09652(18) 0.9821(3) -0.11083(18) 0.0261(6) Uani 1 1 d . . . 
H10 H 0.0933 1.0519 -0.1441 0.031 Uiso 1 1 calc R . . 
C5 C 0.29610(16) 0.5057(2) 0.06911(16) 0.0196(6) Uani 1 1 d . . . 
H5 H 0.2618 0.4430 0.0400 0.024 Uiso 1 1 calc R . . 
C2 C 0.39651(16) 0.6882(2) 0.15417(17) 0.0230(6) Uani 1 1 d . . . 
H2 H 0.4295 0.7516 0.1838 0.028 Uiso 1 1 calc R . . 
C8 C 0.10802(16) 0.8858(2) 0.02154(17) 0.0171(6) Uani 1 1 d . . . 
C14 C 0.22727(16) 0.6774(2) 0.29437(15) 0.0192(6) Uani 1 1 d . . . 
H14A H 0.2015 0.5983 0.2761 0.023 Uiso 1 1 calc R . . 
H14B H 0.2835 0.6801 0.2824 0.023 Uiso 1 1 calc R . . 
C1 C 0.30729(15) 0.6953(2) 0.13190(15) 0.0166(5) Uani 1 1 d . . . 
C4 C 0.38451(17) 0.4919(3) 0.08734(18) 0.0258(6) Uani 1 1 d . . . 
H4 H 0.4093 0.4223 0.0705 0.031 Uiso 1 1 calc R . . 
C13 C 0.17086(16) 0.7787(2) 0.24559(15) 0.0187(6) Uani 1 1 d . . . 
H13A H 0.1118 0.7652 0.2485 0.022 Uiso 1 1 calc R . . 
H13B H 0.1895 0.8569 0.2723 0.022 Uiso 1 1 calc R . . 
C11 C 0.09504(18) 0.8665(3) -0.14578(18) 0.0268(7) Uani 1 1 d . . . 
H11 H 0.0911 0.8577 -0.2030 0.032 Uiso 1 1 calc R . . 
C17 C 0.1793(2) 0.7122(3) 0.64602(18) 0.0311(7) Uani 1 1 d . . . 
H17A H 0.2396 0.6927 0.6639 0.047 Uiso 1 1 calc R . . 
H17B H 0.1508 0.6836 0.6873 0.047 Uiso 1 1 calc R . . 
H17C H 0.1723 0.7995 0.6397 0.047 Uiso 1 1 calc R . . 
C6 C 0.26212(15) 0.8107(2) 0.14856(16) 0.0166(5) Uani 1 1 d . . . 
H6A H 0.2951 0.8483 0.2002 0.020 Uiso 1 1 calc R . . 
H6B H 0.2597 0.8685 0.1031 0.020 Uiso 1 1 calc R . . 
C15 C 0.17437(16) 0.6589(2) 0.42210(17) 0.0189(6) Uani 1 1 d . . . 
C9 C 0.10289(16) 0.9924(3) -0.02565(18) 0.0227(6) Uani 1 1 d . . . 
H9 H 0.1037 1.0691 -0.0005 0.027 Uiso 1 1 calc R . . 
C3 C 0.43517(17) 0.5852(3) 0.13150(19) 0.0270(6) Uani 1 1 d . . . 
H3 H 0.4949 0.5783 0.1457 0.032 Uiso 1 1 calc R . . 
N3 N 0.10722(12) 0.77301(19) -0.01280(13) 0.0162(5) Uani 1 1 d . . . 
N1 N 0.25733(13) 0.60446(19) 0.09111(13) 0.0160(5) Uani 1 1 d . . . 
N5 N 0.18869(14) 0.6953(2) 0.50345(13) 0.0193(5) Uani 1 1 d . . . 
H5A H 0.2288 0.7484 0.5217 0.023 Uiso 1 1 calc R . . 
N4 N 0.23747(13) 0.6902(2) 0.38442(13) 0.0197(5) Uani 1 1 d . . . 
H4A H 0.2852 0.7185 0.4149 0.024 Uiso 1 1 calc R . . 
N2 N 0.17313(13) 0.78564(18) 0.15602(13) 0.0148(4) Uani 1 1 d . . . 
O4 O 0.09721(11) 0.30056(16) 0.04165(11) 0.0189(4) Uani 1 1 d . . . 
O3 O 0.12356(11) 0.47453(16) 0.15850(10) 0.0183(4) Uani 1 1 d . . . 
O5 O 0.09136(11) 0.49934(16) -0.02573(11) 0.0171(4) Uani 1 1 d . . . 
O6 O 0.14932(11) 0.32363(16) -0.08222(11) 0.0198(4) Uani 1 1 d . . . 
O1 O 0.10894(13) 0.60325(19) 0.38418(12) 0.0294(5) Uani 1 1 d . . . 
O2 O 0.00236(10) 0.66418(16) 0.09315(11) 0.0176(4) Uani 1 1 d . . . 
O7 O 0.66093(14) 0.47923(19) 0.20559(15) 0.0385(6) Uani 1 1 d . . . 
C20 C 0.5655(2) 0.2809(3) 0.1972(2) 0.0376(8) Uani 1 1 d . . . 
H20A H 0.6103 0.2433 0.2399 0.056 Uiso 1 1 calc R . . 
H20B H 0.5361 0.2191 0.1589 0.056 Uiso 1 1 calc R . . 
H20C H 0.5253 0.3210 0.2230 0.056 Uiso 1 1 calc R . . 
C21 C 0.6895(2) 0.2961(3) 0.1109(2) 0.0392(8) Uani 1 1 d . . . 
H21A H 0.7240 0.3447 0.0830 0.059 Uiso 1 1 calc R . . 
H21B H 0.6605 0.2331 0.0734 0.059 Uiso 1 1 calc R . . 
H21C H 0.7259 0.2589 0.1601 0.059 Uiso 1 1 calc R . . 
C18 C 0.04521(18) 0.6838(3) 0.53383(19) 0.0347(7) Uani 1 1 d . . . 
H18A H 0.0395 0.7713 0.5275 0.052 Uiso 1 1 calc R . . 
H18B H 0.0161 0.6565 0.5750 0.052 Uiso 1 1 calc R . . 
H18C H 0.0201 0.6448 0.4809 0.052 Uiso 1 1 calc R . . 
C19 C 0.1509(2) 0.5110(3) 0.5727(2) 0.0323(7) Uani 1 1 d . . . 
H19A H 0.1296 0.4720 0.5191 0.048 Uiso 1 1 calc R . . 
H19B H 0.1190 0.4822 0.6112 0.048 Uiso 1 1 calc R . . 
H19C H 0.2108 0.4915 0.5943 0.048 Uiso 1 1 calc R . . 
O8 O 0.01256(12) 0.45374(17) 0.26132(11) 0.0254(4) Uani 1 1 d . . . 
O15 O 0.16256(13) 0.4848(2) 0.79209(14) 0.0415(6) Uani 1 1 d . . . 
 
loop_ 
 _atom_site_aniso_label 
 _atom_site_aniso_U_11 
 _atom_site_aniso_U_22 
 _atom_site_aniso_U_33 
 _atom_site_aniso_U_23 
 _atom_site_aniso_U_13 
 _atom_site_aniso_U_12 
Co1 0.0120(2) 0.0116(2) 0.0148(2) -0.00029(12) 0.00246(16) 0.00004(12) 
S2 0.0115(3) 0.0123(3) 0.0158(4) -0.0007(2) 0.0025(3) 0.0009(2) 
S3 0.0260(4) 0.0267(4) 0.0333(5) 0.0008(3) 0.0088(3) 0.0050(3) 
C7 0.0190(13) 0.0126(13) 0.0200(14) -0.0038(10) 0.0027(11) 0.0030(10) 
C12 0.0210(13) 0.0210(14) 0.0197(14) -0.0001(11) 0.0043(11) 0.0018(11) 
C16 0.0198(13) 0.0242(14) 0.0199(14) 0.0039(11) 0.0066(11) -0.0024(11) 
C10 0.0254(14) 0.0239(15) 0.0294(16) 0.0123(12) 0.0077(12) 0.0039(12) 
C5 0.0176(13) 0.0162(13) 0.0236(14) -0.0030(11) 0.0026(11) -0.0002(10) 
C2 0.0171(13) 0.0223(15) 0.0283(15) -0.0049(12) 0.0034(11) -0.0047(11) 
C8 0.0126(12) 0.0157(13) 0.0215(14) 0.0012(10) 0.0015(11) 0.0021(9) 
C14 0.0226(13) 0.0194(14) 0.0164(13) -0.0022(11) 0.0062(11) -0.0013(11) 
C1 0.0180(13) 0.0177(13) 0.0150(13) -0.0008(10) 0.0057(10) 0.0002(10) 
C4 0.0224(14) 0.0214(14) 0.0356(17) -0.0050(12) 0.0109(12) 0.0034(11) 
C13 0.0195(13) 0.0213(14) 0.0151(13) -0.0041(10) 0.0043(10) 0.0006(10) 
C11 0.0269(15) 0.0354(18) 0.0183(15) 0.0064(12) 0.0061(12) 0.0023(12) 
C17 0.0400(17) 0.0341(17) 0.0219(15) -0.0027(13) 0.0127(13) -0.0085(14) 
C6 0.0159(12) 0.0128(12) 0.0204(14) -0.0015(10) 0.0035(10) -0.0028(10) 
C15 0.0172(13) 0.0160(13) 0.0218(14) 0.0000(11) 0.0018(11) 0.0000(11) 
C9 0.0185(13) 0.0165(13) 0.0327(16) 0.0019(12) 0.0056(11) 0.0002(11) 
C3 0.0147(13) 0.0290(16) 0.0366(17) -0.0047(13) 0.0052(12) 0.0012(12) 
N3 0.0127(10) 0.0165(11) 0.0188(12) -0.0013(9) 0.0028(9) -0.0011(8) 
N1 0.0162(11) 0.0161(11) 0.0152(11) -0.0006(9) 0.0032(9) -0.0009(8) 
N5 0.0206(11) 0.0209(12) 0.0162(11) -0.0029(9) 0.0041(9) -0.0098(9) 
N4 0.0146(11) 0.0287(13) 0.0149(11) -0.0014(9) 0.0021(9) -0.0056(9) 
N2 0.0142(10) 0.0150(11) 0.0157(11) 0.0006(8) 0.0046(8) 0.0020(8) 
O4 0.0228(9) 0.0127(9) 0.0210(10) 0.0017(7) 0.0050(8) 0.0014(7) 
O3 0.0194(9) 0.0178(10) 0.0165(9) 0.0018(7) 0.0023(7) 0.0013(7) 
O5 0.0212(9) 0.0139(9) 0.0159(9) -0.0004(7) 0.0042(7) -0.0005(7) 
O6 0.0177(9) 0.0212(10) 0.0219(10) -0.0007(8) 0.0075(8) 0.0049(8) 
O1 0.0213(10) 0.0406(12) 0.0245(11) -0.0072(9) 0.0023(8) -0.0133(9) 
O2 0.0140(8) 0.0181(9) 0.0194(10) -0.0030(7) 0.0019(7) -0.0005(7) 
O7 0.0376(12) 0.0288(12) 0.0537(15) -0.0123(10) 0.0200(11) -0.0079(10) 
C20 0.0336(17) 0.0397(18) 0.0377(18) -0.0021(15) 0.0053(14) -0.0130(14) 
C21 0.0394(18) 0.0323(18) 0.049(2) -0.0101(16) 0.0175(16) 0.0050(14) 
C18 0.0250(15) 0.052(2) 0.0306(17) 0.0046(15) 0.0126(13) 0.0014(14) 
C19 0.0397(17) 0.0254(16) 0.0336(17) 0.0042(13) 0.0127(14) -0.0055(14) 
O8 0.0305(10) 0.0240(10) 0.0218(10) -0.0006(8) 0.0071(8) 0.0004(8) 
O15 0.0285(11) 0.0543(15) 0.0404(13) 0.0204(11) 0.0065(10) -0.0019(10) 
 
_geom_special_details 
; 
 All esds (except the esd in the dihedral angle between two l.s. planes) 
 are estimated using the full covariance matrix.  The cell esds are taken 
 into account individually in the estimation of esds in distances, angles 
 and torsion angles; correlations between esds in cell parameters are only 
 used when they are defined by crystal symmetry.  An approximate (isotropic) 
 treatment of cell esds is used for estimating esds involving l.s. planes. 
; 
 
loop_ 
 _geom_bond_atom_site_label_1 
 _geom_bond_atom_site_label_2 
 _geom_bond_distance 
 _geom_bond_site_symmetry_2 
 _geom_bond_publ_flag 
Co1 O2 2.0634(16) . ? 
Co1 O5 2.0809(17) . ? 
Co1 N3 2.121(2) . ? 
Co1 N1 2.134(2) . ? 
Co1 O3 2.1468(17) . ? 
Co1 N2 2.248(2) . ? 
S2 O6 1.4680(17) . ? 
S2 O2 1.4749(17) 3_565 ? 
S2 O4 1.4760(18) . ? 
S2 O5 1.4817(18) . ? 
S3 O7 1.497(2) . ? 
S3 C21 1.783(3) . ? 
S3 C20 1.793(3) . ? 
C7 N2 1.486(3) . ? 
C7 C8 1.505(4) . ? 
C12 N3 1.338(3) . ? 
C12 C11 1.372(4) . ? 
C16 N5 1.470(3) . ? 
C16 C17 1.516(4) . ? 
C16 C18 1.522(4) . ? 
C16 C19 1.530(4) . ? 
C10 C9 1.381(4) . ? 
C10 C11 1.382(4) . ? 
C5 N1 1.336(3) . ? 
C5 C4 1.381(4) . ? 
C2 C3 1.377(4) . ? 
C2 C1 1.387(3) . ? 
C8 N3 1.350(3) . ? 
C8 C9 1.387(4) . ? 
C14 N4 1.453(3) . ? 
C14 C13 1.520(4) . ? 
C1 N1 1.342(3) . ? 
C1 C6 1.509(3) . ? 
C4 C3 1.386(4) . ? 
C13 N2 1.482(3) . ? 
C6 N2 1.487(3) . ? 
C15 O1 1.236(3) . ? 
C15 N4 1.355(3) . ? 
C15 N5 1.357(3) . ? 
O2 S2 1.4750(17) 3_565 ? 
 
loop_ 
 _geom_angle_atom_site_label_1 
 _geom_angle_atom_site_label_2 
 _geom_angle_atom_site_label_3 
 _geom_angle 
 _geom_angle_site_symmetry_1 
 _geom_angle_site_symmetry_3 
 _geom_angle_publ_flag 
O2 Co1 O5 102.63(7) . . ? 
O2 Co1 N3 89.79(7) . . ? 
O5 Co1 N3 90.88(8) . . ? 
O2 Co1 N1 162.25(7) . . ? 
O5 Co1 N1 94.04(7) . . ? 
N3 Co1 N1 96.08(8) . . ? 
O2 Co1 O3 85.32(7) . . ? 
O5 Co1 O3 88.52(7) . . ? 
N3 Co1 O3 174.83(7) . . ? 
N1 Co1 O3 89.08(7) . . ? 
O2 Co1 N2 87.39(7) . . ? 
O5 Co1 N2 164.08(7) . . ? 
N3 Co1 N2 76.65(8) . . ? 
N1 Co1 N2 77.76(7) . . ? 
O3 Co1 N2 104.78(7) . . ? 
O6 S2 O2 109.03(10) . 3_565 ? 
O6 S2 O4 109.09(10) . . ? 
O2 S2 O4 109.71(10) 3_565 . ? 
O6 S2 O5 109.70(10) . . ? 
O2 S2 O5 109.34(10) 3_565 . ? 
O4 S2 O5 109.95(10) . . ? 
O7 S3 C21 106.84(14) . . ? 
O7 S3 C20 105.82(14) . . ? 
C21 S3 C20 99.08(17) . . ? 
N2 C7 C8 109.95(19) . . ? 
N3 C12 C11 122.2(3) . . ? 
N5 C16 C17 106.3(2) . . ? 
N5 C16 C18 111.6(2) . . ? 
C17 C16 C18 109.1(2) . . ? 
N5 C16 C19 109.9(2) . . ? 
C17 C16 C19 109.4(2) . . ? 
C18 C16 C19 110.3(2) . . ? 
C9 C10 C11 118.9(3) . . ? 
N1 C5 C4 123.4(2) . . ? 
C3 C2 C1 118.6(2) . . ? 
N3 C8 C9 122.4(2) . . ? 
N3 C8 C7 115.3(2) . . ? 
C9 C8 C7 122.4(2) . . ? 
N4 C14 C13 111.5(2) . . ? 
N1 C1 C2 122.5(2) . . ? 
N1 C1 C6 116.8(2) . . ? 
C2 C1 C6 120.6(2) . . ? 
C5 C4 C3 117.9(2) . . ? 
N2 C13 C14 113.6(2) . . ? 
C12 C11 C10 119.6(3) . . ? 
N2 C6 C1 112.07(19) . . ? 
O1 C15 N4 122.0(2) . . ? 
O1 C15 N5 123.5(2) . . ? 
N4 C15 N5 114.5(2) . . ? 
C10 C9 C8 118.5(3) . . ? 
C2 C3 C4 119.6(2) . . ? 
C12 N3 C8 118.4(2) . . ? 
C12 N3 Co1 126.29(18) . . ? 
C8 N3 Co1 115.34(17) . . ? 
C5 N1 C1 117.9(2) . . ? 
C5 N1 Co1 124.91(17) . . ? 
C1 N1 Co1 117.04(16) . . ? 
C15 N5 C16 124.4(2) . . ? 
C15 N4 C14 122.3(2) . . ? 
C13 N2 C7 108.96(19) . . ? 
C13 N2 C6 110.72(19) . . ? 
C7 N2 C6 108.34(19) . . ? 
C13 N2 Co1 117.65(15) . . ? 
C7 N2 Co1 102.62(14) . . ? 
C6 N2 Co1 107.96(14) . . ? 
S2 O5 Co1 139.58(11) . . ? 
S2 O2 Co1 128.86(10) 3_565 . ? 
 
_diffrn_measured_fraction_theta_max    1.000 
_diffrn_reflns_theta_full              25.00 
_diffrn_measured_fraction_theta_full   1.000 
_refine_diff_density_max    0.725 
_refine_diff_density_min   -0.539 
_refine_diff_density_rms    0.078 
#END
 
data_Complex4
 
_audit_creation_method            SHELXL-2013
_chemical_name_systematic
;
 ?
;
_chemical_name_common             ?
_chemical_melting_point           ?
_chemical_formula_moiety          ?
_chemical_formula_sum
 'C38 H54 Mn2 N10 O14 S2' 
_chemical_formula_weight          1048.91

loop_
 _atom_type_symbol
 _atom_type_description
 _atom_type_scat_dispersion_real
 _atom_type_scat_dispersion_imag
 _atom_type_scat_source
 'C'  'C'   0.0033   0.0016
 'International Tables Vol C Tables 4.2.6.8 and 6.1.1.4'
 'H'  'H'   0.0000   0.0000
 'International Tables Vol C Tables 4.2.6.8 and 6.1.1.4'
 'N'  'N'   0.0061   0.0033
 'International Tables Vol C Tables 4.2.6.8 and 6.1.1.4'
 'O'  'O'   0.0106   0.0060
 'International Tables Vol C Tables 4.2.6.8 and 6.1.1.4'
 'S'  'S'   0.1246   0.1234
 'International Tables Vol C Tables 4.2.6.8 and 6.1.1.4'
 'Mn'  'Mn'   0.3368   0.7283
 'International Tables Vol C Tables 4.2.6.8 and 6.1.1.4'
 
_space_group_crystal_system       monoclinic
_space_group_IT_number            14
_space_group_name_H-M_alt         'P 21/n'
_space_group_name_Hall            '-P 2yn'
 
_shelx_space_group_comment
;
The symmetry employed for this shelxl refinement is uniquely defined
by the following loop, which should always be used as a source of
symmetry information in preference to the above space-group names.
They are only intended as comments.
;
 
loop_
 _space_group_symop_operation_xyz
 'x, y, z'
 '-x+1/2, y+1/2, -z+1/2'
 '-x, -y, -z'
 'x-1/2, -y-1/2, z-1/2'
 
_cell_length_a                    13.439(2)
_cell_length_b                    10.8861(17)
_cell_length_c                    19.870(3)
_cell_angle_alpha                 90
_cell_angle_beta                  109.719(4)
_cell_angle_gamma                 90
_cell_volume                      2736.5(8)
_cell_formula_units_Z             2
_cell_measurement_temperature     150(2)
_cell_measurement_reflns_used     ? 
_cell_measurement_theta_min       ? 
_cell_measurement_theta_max       27.4 
 
_exptl_crystal_description        'Triclinic' 
_exptl_crystal_colour             'Colourless' 
_exptl_crystal_density_meas       ? 
_exptl_crystal_density_method     ?              
_exptl_crystal_density_diffrn     1.273          
_exptl_crystal_F_000              1092
_exptl_transmission_factor_min    ?                                             
_exptl_transmission_factor_max    ?                                             
_exptl_crystal_size_max           0.28 
_exptl_crystal_size_mid           0.16 
_exptl_crystal_size_min           0.12 
_exptl_absorpt_coefficient_mu     0.601
_shelx_estimated_absorpt_T_min    ? 
_shelx_estimated_absorpt_T_max    ? 
_exptl_absorpt_correction_type    'MULTI-SCAN'  
_exptl_absorpt_correction_T_min   0.891 
_exptl_absorpt_correction_T_max   0.930 
_exptl_absorpt_process_details    'SADABS'  
 
_exptl_special_details
;
 ?
;
 
_diffrn_ambient_temperature       150(2)
_diffrn_radiation_wavelength      0.71073
_diffrn_radiation_type            MoK\a
_diffrn_source                    ?                       
_diffrn_measurement_device_type   'Bruker APEX-II CCD' 
_diffrn_measurement_method        '\f and \w scans' 
_diffrn_detector_area_resol_mean  ? 
_diffrn_reflns_number             23492
_diffrn_reflns_av_unetI/netI      0.0708
_diffrn_reflns_av_R_equivalents   0.0581
_diffrn_reflns_limit_h_min        -15
_diffrn_reflns_limit_h_max        16
_diffrn_reflns_limit_k_min        -13
_diffrn_reflns_limit_k_max        14
_diffrn_reflns_limit_l_min        -25
_diffrn_reflns_limit_l_max        25
_diffrn_reflns_theta_min          1.610
_diffrn_reflns_theta_max          27.493
_diffrn_reflns_theta_full         25.242
_diffrn_measured_fraction_theta_max   0.701
_diffrn_measured_fraction_theta_full  0.682
_diffrn_reflns_Laue_measured_fraction_max    0.701
_diffrn_reflns_Laue_measured_fraction_full   0.682
_diffrn_reflns_point_group_measured_fraction_max   0.701
_diffrn_reflns_point_group_measured_fraction_full  0.682
_reflns_number_total              4417
_reflns_number_gt                 3338
_reflns_threshold_expression      'I > 2\s(I)'
_reflns_Friedel_coverage          0.000
_reflns_Friedel_fraction_max      .
_reflns_Friedel_fraction_full     .
 
_reflns_special_details
;
 Reflections were merged by SHELXL according to the crystal
 class for the calculation of statistics and refinement.
 
 _reflns_Friedel_fraction is defined as the number of unique
 Friedel pairs measured divided by the number that would be
 possible theoretically, ignoring centric projections and
 systematic absences.
;
 
_computing_data_collection        'Bruker APEX2' 
_computing_cell_refinement        'Bruker SAINT' 
_computing_data_reduction         'Bruker SAINT' 
_computing_structure_solution     'SHELXS-97 (Sheldrick, 2008)'
_computing_structure_refinement   'SHELXL-97 (Sheldrick, 2008)' 
_computing_molecular_graphics     'MERCURY 3.2' 
_computing_publication_material   'ORTEP 3V.2' 
 
_refine_special_details
; 
 Refinement of F^2^ against ALL reflections.  The weighted R-factor wR and 
 goodness of fit S are based on F^2^, conventional R-factors R are based 
 on F, with F set to zero for negative F^2^. The threshold expression of 
 F^2^ > 2sigma(F^2^) is used only for calculating R-factors(gt) etc. and is 
 not relevant to the choice of reflections for refinement.  R-factors based 
 on F^2^ are statistically about twice as large as those based on F, and R- 
 factors based on ALL data will be even larger. 
;
 loop_
  _platon_squeeze_void_nr
  _platon_squeeze_void_average_x
  _platon_squeeze_void_average_y
  _platon_squeeze_void_average_z
  _platon_squeeze_void_volume
  _platon_squeeze_void_count_electrons
  _platon_squeeze_void_content
   1  0.000 -0.008  0.500       306        81 ' '
   2  0.500 -0.008  1.000       306        81 ' '
_platon_squeeze_details
;
The unit cell contains some disordered water molecules which have been treated as a diffuse contribution to the overall scatterin without 
specific atom positions by SQUEEZE/PLATON.
;
_refine_ls_structure_factor_coef  Fsqd
_refine_ls_matrix_type            full
_refine_ls_weighting_scheme       calc
_refine_ls_weighting_details
'w=1/[\s^2^(Fo^2^)+(0.1974P)^2^+5.7608P] where P=(Fo^2^+2Fc^2^)/3'
_atom_sites_solution_primary      ?
_atom_sites_solution_secondary    ?
_atom_sites_solution_hydrogens    geom
_refine_ls_hydrogen_treatment     constr
_refine_ls_extinction_method      none
_refine_ls_extinction_coef        .
_refine_ls_number_reflns          4417
_refine_ls_number_parameters      301
_refine_ls_number_restraints      0
_refine_ls_R_factor_all           0.1246
_refine_ls_R_factor_gt            0.1038
_refine_ls_wR_factor_ref          0.3233
_refine_ls_wR_factor_gt           0.3126
_refine_ls_goodness_of_fit_ref    1.153
_refine_ls_restrained_S_all       1.153
_refine_ls_shift/su_max           0.008
_refine_ls_shift/su_mean          0.000
 
loop_
 _atom_site_label
 _atom_site_type_symbol
 _atom_site_fract_x
 _atom_site_fract_y
 _atom_site_fract_z
 _atom_site_U_iso_or_equiv
 _atom_site_adp_type
 _atom_site_occupancy
 _atom_site_site_symmetry_order  
 _atom_site_calc_flag
 _atom_site_refinement_flags_posn
 _atom_site_refinement_flags_adp
 _atom_site_refinement_flags_occupancy
 _atom_site_disorder_assembly
 _atom_site_disorder_group
Mn1 Mn 0.05283(8) 0.38611(8) 0.10848(5) 0.0183(3) Uani 1 1 d . . . . .
S2 S 0.08765(13) 0.35229(13) -0.04553(8) 0.0210(4) Uani 1 1 d . . . . .
N3 N -0.0636(5) 0.2311(5) 0.0751(3) 0.0261(13) Uani 1 1 d . . . . .
C8 C 0.0061(5) 0.5091(6) 0.2394(3) 0.0216(13) Uani 1 1 d . . . . .
H8 H -0.0180 0.5732 0.2070 0.026 Uiso 1 1 calc R U . . .
C1 C 0.4783(6) 0.3357(6) 0.2425(4) 0.0253(14) Uani 1 1 d . . . . .
C15 C 0.2520(5) 0.2043(6) 0.2010(3) 0.0206(13) Uani 1 1 d . . . . .
H15A H 0.2770 0.2046 0.1605 0.025 Uiso 1 1 calc R U . . .
H15B H 0.2758 0.1287 0.2274 0.025 Uiso 1 1 calc R U . . .
C4 C 0.0671(5) 0.3123(6) 0.2638(3) 0.0217(13) Uani 1 1 d . . . . .
C11 C 0.0952(6) 0.1083(5) 0.1214(3) 0.0224(14) Uani 1 1 d . . . . .
H11A H 0.1116 0.0294 0.1453 0.027 Uiso 1 1 calc R U . . .
H11B H 0.1308 0.1128 0.0863 0.027 Uiso 1 1 calc R U . . .
C14 C -0.1677(6) 0.2458(6) 0.0441(4) 0.0293(16) Uani 1 1 d . . . . .
H14 H -0.1954 0.3249 0.0369 0.035 Uiso 1 1 calc R U . . .
C5 C 0.0740(7) 0.3208(7) 0.3349(4) 0.0316(16) Uani 1 1 d . . . . .
H5 H 0.0959 0.2547 0.3661 0.038 Uiso 1 1 calc R U . . .
C10 C -0.0863(7) 0.0139(6) 0.0620(4) 0.0318(17) Uani 1 1 d . . . . .
H10 H -0.0572 -0.0645 0.0689 0.038 Uiso 1 1 calc R U . . .
C9 C -0.0221(6) 0.1181(6) 0.0840(3) 0.0255(15) Uani 1 1 d . . . . .
C3 C 0.6667(7) 0.3669(8) 0.2522(5) 0.0342(17) Uani 1 1 d . . . . .
C7 C 0.0114(6) 0.5268(7) 0.3096(4) 0.0279(14) Uani 1 1 d . . . . .
H7 H -0.0087 0.6013 0.3240 0.033 Uiso 1 1 calc R U . . .
C12 C -0.1935(7) 0.0308(7) 0.0298(5) 0.0373(18) Uani 1 1 d . . . . .
H12 H -0.2372 -0.0368 0.0130 0.045 Uiso 1 1 calc R U . . .
C6 C 0.0465(7) 0.4335(8) 0.3573(4) 0.0349(17) Uani 1 1 d . . . . .
H6 H 0.0522 0.4447 0.4049 0.042 Uiso 1 1 calc R U . . .
C2 C 0.7718(8) 0.3370(9) 0.3113(6) 0.046(2) Uani 1 1 d . . . . .
H2A H 0.7698 0.3668 0.3563 0.069 Uiso 1 1 calc R U . . .
H2B H 0.8288 0.3758 0.3006 0.069 Uiso 1 1 calc R U . . .
H2C H 0.7824 0.2496 0.3140 0.069 Uiso 1 1 calc R U . . .
N2 N 0.4140(4) 0.3077(5) 0.2798(3) 0.0226(12) Uani 1 1 d . . . . .
H2 H 0.4422 0.2846 0.3235 0.027 Uiso 1 1 calc R U . . .
N1 N 0.5826(5) 0.3236(6) 0.2780(3) 0.0306(14) Uani 1 1 d . . . . .
H1 H 0.6013 0.2878 0.3190 0.037 Uiso 1 1 calc R U . . .
O1 O 0.4423(5) 0.3719(5) 0.1793(3) 0.0359(13) Uani 1 1 d . . . . .
O2 O 0.1261(4) 0.3309(4) 0.0331(2) 0.0266(11) Uani 1 1 d . . . . .
O3 O -0.0134(4) 0.2867(4) -0.0781(2) 0.0274(12) Uani 1 1 d . . . . .
O4 O 0.1657(5) 0.3059(5) -0.0748(3) 0.0327(12) Uani 1 1 d . . . . .
O5 O 0.1636(4) 0.5421(4) 0.1314(2) 0.0217(10) Uani 1 1 d . . . . .
N4 N 0.0340(5) 0.4047(5) 0.2167(3) 0.0216(12) Uani 1 1 d . . . . .
N5 N 0.1343(4) 0.2081(5) 0.1746(3) 0.0197(11) Uani 1 1 d . . . . .
O6 O -0.0705(4) 0.5140(4) 0.0589(2) 0.0244(11) Uani 1 1 d . . . . .
C16 C 0.2996(5) 0.3147(6) 0.2497(3) 0.0225(13) Uani 1 1 d . . . . .
H16A H 0.2797 0.3899 0.2222 0.027 Uiso 1 1 calc R U . . .
H16B H 0.2706 0.3176 0.2882 0.027 Uiso 1 1 calc R U . . .
C17 C 0.6605(10) 0.5079(9) 0.2414(6) 0.050(2) Uani 1 1 d . . . . .
H17A H 0.5976 0.5284 0.2025 0.076 Uiso 1 1 calc R U . . .
H17B H 0.7213 0.5357 0.2307 0.076 Uiso 1 1 calc R U . . .
H17C H 0.6589 0.5471 0.2843 0.076 Uiso 1 1 calc R U . . .
C18 C 0.0941(5) 0.1916(6) 0.2331(3) 0.0221(13) Uani 1 1 d . . . . .
H18A H 0.1464 0.1473 0.2713 0.027 Uiso 1 1 calc R U . . .
H18B H 0.0310 0.1412 0.2167 0.027 Uiso 1 1 calc R U . . .
C19 C -0.2364(7) 0.1461(7) 0.0223(4) 0.0352(18) Uani 1 1 d . . . . .
H19 H -0.3091 0.1577 0.0033 0.042 Uiso 1 1 calc R U . . .
C20 C 0.6657(9) 0.3002(10) 0.1827(5) 0.046(2) Uani 1 1 d . . . . .
H20A H 0.6668 0.2130 0.1900 0.069 Uiso 1 1 calc R U . . .
H20B H 0.7267 0.3242 0.1711 0.069 Uiso 1 1 calc R U . . .
H20C H 0.6028 0.3224 0.1442 0.069 Uiso 1 1 calc R U . . .
O8 O 0.1703(18) 0.045(2) 0.4123(10) 0.169(8) Uani 1 1 d . . . . .
 
loop_
 _atom_site_aniso_label
 _atom_site_aniso_U_11
 _atom_site_aniso_U_22
 _atom_site_aniso_U_33
 _atom_site_aniso_U_23
 _atom_site_aniso_U_13
 _atom_site_aniso_U_12
Mn1 0.0185(5) 0.0096(5) 0.0151(5) -0.0003(3) -0.0096(4) 0.0016(3)
S2 0.0258(9) 0.0098(7) 0.0157(7) -0.0017(5) -0.0084(6) 0.0057(5)
N3 0.027(3) 0.012(2) 0.025(3) -0.0002(19) -0.010(2) -0.002(2)
C8 0.020(3) 0.016(3) 0.024(3) 0.001(2) 0.001(2) -0.001(2)
C1 0.030(4) 0.015(3) 0.024(3) 0.006(2) -0.001(3) -0.003(2)
C15 0.018(3) 0.017(3) 0.016(3) -0.001(2) -0.009(2) 0.002(2)
C4 0.021(3) 0.017(3) 0.017(3) 0.005(2) -0.008(2) 0.004(2)
C11 0.027(3) 0.008(3) 0.020(3) -0.0006(19) -0.007(3) 0.004(2)
C14 0.031(4) 0.018(3) 0.026(3) 0.003(2) -0.006(3) 0.002(3)
C5 0.034(4) 0.031(4) 0.025(3) 0.003(3) 0.003(3) 0.011(3)
C10 0.043(5) 0.016(3) 0.026(3) 0.000(2) -0.003(3) 0.003(3)
C9 0.035(4) 0.013(3) 0.018(3) 0.001(2) -0.004(3) 0.006(2)
C3 0.025(4) 0.033(4) 0.042(4) 0.003(3) 0.008(3) -0.005(3)
C7 0.022(3) 0.024(3) 0.034(3) -0.001(3) 0.005(3) 0.001(3)
C12 0.032(4) 0.027(4) 0.042(4) -0.012(3) -0.002(3) -0.011(3)
C6 0.035(4) 0.036(4) 0.025(3) 0.003(3) -0.001(3) 0.016(3)
C2 0.032(4) 0.046(5) 0.055(5) -0.001(4) 0.009(4) -0.012(4)
N2 0.012(2) 0.024(3) 0.020(2) 0.006(2) -0.010(2) 0.004(2)
N1 0.033(3) 0.024(3) 0.026(3) 0.007(2) -0.001(3) -0.001(2)
O1 0.043(3) 0.036(3) 0.022(2) 0.011(2) 0.001(2) 0.005(2)
O2 0.028(3) 0.019(2) 0.019(2) -0.0010(17) -0.0089(19) 0.0064(19)
O3 0.031(3) 0.012(2) 0.021(2) -0.0066(16) -0.0150(19) -0.0017(18)
O4 0.038(3) 0.031(3) 0.024(2) 0.002(2) 0.004(2) 0.010(2)
O5 0.025(2) 0.015(2) 0.0173(19) 0.0011(15) -0.0032(17) -0.0006(17)
N4 0.023(3) 0.011(2) 0.020(2) -0.0001(18) -0.007(2) 0.0022(19)
N5 0.019(3) 0.013(2) 0.017(2) -0.0008(18) -0.007(2) 0.0034(19)
O6 0.023(2) 0.009(2) 0.026(2) -0.0008(16) -0.0098(19) 0.0043(17)
C16 0.015(3) 0.022(3) 0.020(3) -0.002(2) -0.009(2) 0.004(2)
C17 0.058(6) 0.035(5) 0.062(6) 0.008(4) 0.026(5) -0.014(4)
C18 0.026(3) 0.011(3) 0.017(3) 0.003(2) -0.008(2) 0.005(2)
C19 0.025(4) 0.029(4) 0.035(4) -0.005(3) -0.012(3) -0.009(3)
C20 0.049(5) 0.053(5) 0.040(4) -0.004(4) 0.019(4) -0.015(4)
O8 0.149(17) 0.21(2) 0.125(14) 0.007(14) 0.014(13) -0.028(18)
 
_geom_special_details
;
 All esds (except the esd in the dihedral angle between two l.s. planes)
 are estimated using the full covariance matrix.  The cell esds are taken
 into account individually in the estimation of esds in distances, angles
 and torsion angles; correlations between esds in cell parameters are only
 used when they are defined by crystal symmetry.  An approximate (isotropic)
 treatment of cell esds is used for estimating esds involving l.s. planes.
;
 
loop_
 _geom_bond_atom_site_label_1
 _geom_bond_atom_site_label_2
 _geom_bond_distance
 _geom_bond_site_symmetry_2
 _geom_bond_publ_flag
Mn1 O6 2.134(5) . ?
Mn1 O2 2.137(6) . ?
Mn1 O5 2.202(5) . ?
Mn1 N3 2.244(6) . ?
Mn1 N4 2.257(6) . ?
Mn1 N5 2.389(5) . ?
S2 O4 1.450(6) . ?
S2 O3 1.477(5) . ?
S2 O6 1.484(4) 3_565 ?
S2 O2 1.490(5) . ?
N3 C14 1.334(10) . ?
N3 C9 1.338(8) . ?
C8 N4 1.324(9) . ?
C8 C7 1.386(10) . ?
C1 O1 1.248(8) . ?
C1 N1 1.346(10) . ?
C1 N2 1.350(10) . ?
C15 N5 1.489(8) . ?
C15 C16 1.540(9) . ?
C4 N4 1.343(8) . ?
C4 C5 1.388(10) . ?
C4 C18 1.541(9) . ?
C11 N5 1.483(8) . ?
C11 C9 1.502(10) . ?
C14 C19 1.396(10) . ?
C5 C6 1.397(11) . ?
C10 C12 1.377(12) . ?
C10 C9 1.403(10) . ?
C3 N1 1.468(11) . ?
C3 C2 1.537(12) . ?
C3 C17 1.549(13) . ?
C3 C20 1.556(13) . ?
C7 C6 1.360(11) . ?
C12 C19 1.368(12) . ?
N2 C16 1.451(8) . ?
N5 C18 1.451(9) . ?
O6 S2 1.484(4) 3_565 ?
 
loop_
 _geom_angle_atom_site_label_1
 _geom_angle_atom_site_label_2
 _geom_angle_atom_site_label_3
 _geom_angle
 _geom_angle_site_symmetry_1
 _geom_angle_site_symmetry_3
 _geom_angle_publ_flag
O6 Mn1 O2 109.28(19) . . ?
O6 Mn1 O5 87.61(18) . . ?
O2 Mn1 O5 85.53(19) . . ?
O6 Mn1 N3 89.9(2) . . ?
O2 Mn1 N3 91.2(2) . . ?
O5 Mn1 N3 175.01(19) . . ?
O6 Mn1 N4 93.5(2) . . ?
O2 Mn1 N4 156.75(19) . . ?
O5 Mn1 N4 91.13(19) . . ?
N3 Mn1 N4 93.3(2) . . ?
O6 Mn1 N5 157.4(2) . . ?
O2 Mn1 N5 85.56(19) . . ?
O5 Mn1 N5 111.06(18) . . ?
N3 Mn1 N5 72.4(2) . . ?
N4 Mn1 N5 74.18(19) . . ?
O4 S2 O3 109.8(3) . . ?
O4 S2 O6 111.0(3) . 3_565 ?
O3 S2 O6 109.4(3) . 3_565 ?
O4 S2 O2 108.9(3) . . ?
O3 S2 O2 109.1(3) . . ?
O6 S2 O2 108.6(3) 3_565 . ?
C14 N3 C9 119.8(6) . . ?
C14 N3 Mn1 124.4(5) . . ?
C9 N3 Mn1 115.8(5) . . ?
N4 C8 C7 122.5(6) . . ?
O1 C1 N1 122.7(7) . . ?
O1 C1 N2 121.4(7) . . ?
N1 C1 N2 115.9(6) . . ?
N5 C15 C16 111.5(5) . . ?
N4 C4 C5 123.5(6) . . ?
N4 C4 C18 115.5(6) . . ?
C5 C4 C18 121.0(6) . . ?
N5 C11 C9 111.2(5) . . ?
N3 C14 C19 122.1(7) . . ?
C4 C5 C6 116.7(7) . . ?
C12 C10 C9 118.3(7) . . ?
N3 C9 C10 121.1(7) . . ?
N3 C9 C11 116.8(6) . . ?
C10 C9 C11 122.0(6) . . ?
N1 C3 C2 106.4(7) . . ?
N1 C3 C17 110.8(8) . . ?
C2 C3 C17 108.0(8) . . ?
N1 C3 C20 112.5(7) . . ?
C2 C3 C20 108.1(8) . . ?
C17 C3 C20 110.8(8) . . ?
C6 C7 C8 119.1(7) . . ?
C19 C12 C10 120.6(7) . . ?
C7 C6 C5 120.1(7) . . ?
C1 N2 C16 123.2(5) . . ?
C1 N1 C3 125.0(6) . . ?
S2 O2 Mn1 127.8(3) . . ?
C8 N4 C4 118.1(6) . . ?
C8 N4 Mn1 122.5(4) . . ?
C4 N4 Mn1 118.6(5) . . ?
C18 N5 C11 110.0(5) . . ?
C18 N5 C15 110.6(5) . . ?
C11 N5 C15 108.1(5) . . ?
C18 N5 Mn1 108.4(4) . . ?
C11 N5 Mn1 102.5(3) . . ?
C15 N5 Mn1 116.9(4) . . ?
S2 O6 Mn1 140.5(3) 3_565 . ?
N2 C16 C15 112.1(6) . . ?
N5 C18 C4 114.3(5) . . ?
C12 C19 C14 118.0(8) . . ?
 
_refine_diff_density_max    1.554
_refine_diff_density_min   -0.608
_refine_diff_density_rms    0.141

_shelxl_version_number 2013-4

_shelx_res_file
;
TITL test3 in P2(1)/n
CELL 0.71073  13.43950  10.88610  19.86970  90.0000 109.7188  90.0000
ZERR   2.00   0.00220   0.00170   0.00320   0.0000   0.0039   0.0000
LATT 1
SYMM 0.5-X, 0.5+Y, 0.5-Z
SFAC C  H  N  O  S  Mn
UNIT 76  108  20  28  4  4
OMIT -2 55
L.S. 20
ACTA
BOND
FMAP 2
PLAN 20
TEMP 20.000
WGHT    0.197400    5.760800
FVAR       1.43817
MOLE 1
MN1   6    0.052834    0.386113    0.108479    11.00000    0.01854    0.00957 =
         0.01506   -0.00025   -0.00956    0.00162
S2    5    0.087650    0.352288   -0.045534    11.00000    0.02582    0.00984 =
         0.01574   -0.00168   -0.00836    0.00570
N3    3   -0.063591    0.231146    0.075054    11.00000    0.02716    0.01176 =
         0.02511   -0.00016   -0.00992   -0.00223
C8    1    0.006084    0.509143    0.239422    11.00000    0.01965    0.01558 =
         0.02429    0.00115    0.00058   -0.00137
AFIX  43
H8    2   -0.018026    0.573204    0.207027    11.00000   -1.20000
AFIX   0
C1    1    0.478331    0.335659    0.242478    11.00000    0.02974    0.01483 =
         0.02403    0.00636   -0.00052   -0.00327
C15   1    0.252008    0.204303    0.200992    11.00000    0.01761    0.01735 =
         0.01571   -0.00068   -0.00890    0.00201
AFIX  23
H15A  2    0.276993    0.204627    0.160541    11.00000   -1.20000
H15B  2    0.275763    0.128735    0.227396    11.00000   -1.20000
AFIX   0
C4    1    0.067150    0.312317    0.263764    11.00000    0.02069    0.01723 =
         0.01671    0.00459   -0.00760    0.00371
C11   1    0.095177    0.108309    0.121360    11.00000    0.02728    0.00814 =
         0.01999   -0.00056   -0.00737    0.00356
AFIX  23
H11A  2    0.111630    0.029426    0.145256    11.00000   -1.20000
H11B  2    0.130820    0.112768    0.086341    11.00000   -1.20000
AFIX   0
C14   1   -0.167683    0.245782    0.044147    11.00000    0.03133    0.01818 =
         0.02622    0.00290   -0.00619    0.00202
AFIX  43
H14   2   -0.195355    0.324910    0.036899    11.00000   -1.20000
AFIX   0
C5    1    0.074044    0.320779    0.334912    11.00000    0.03408    0.03065 =
         0.02455    0.00255    0.00265    0.01116
AFIX  43
H5    2    0.095883    0.254708    0.366106    11.00000   -1.20000
AFIX   0
C10   1   -0.086320    0.013928    0.061989    11.00000    0.04312    0.01555 =
         0.02578   -0.00014   -0.00285    0.00333
AFIX  43
H10   2   -0.057240   -0.064531    0.068929    11.00000   -1.20000
AFIX   0
C9    1   -0.022101    0.118075    0.084039    11.00000    0.03508    0.01291 =
         0.01840    0.00097   -0.00440    0.00551
C3    1    0.666699    0.366904    0.252201    11.00000    0.02496    0.03262 =
         0.04247    0.00291    0.00810   -0.00515
C7    1    0.011439    0.526758    0.309640    11.00000    0.02196    0.02418 =
         0.03401   -0.00058    0.00489    0.00111
AFIX  43
H7    2   -0.008691    0.601321    0.323956    11.00000   -1.20000
AFIX   0
C12   1   -0.193539    0.030770    0.029795    11.00000    0.03221    0.02659 =
         0.04226   -0.01230   -0.00166   -0.01097
AFIX  43
H12   2   -0.237186   -0.036823    0.012979    11.00000   -1.20000
AFIX   0
C6    1    0.046541    0.433487    0.357306    11.00000    0.03504    0.03647 =
         0.02513    0.00289   -0.00063    0.01634
AFIX  43
H6    2    0.052241    0.444749    0.404861    11.00000   -1.20000
AFIX   0
C2    1    0.771782    0.336968    0.311336    11.00000    0.03192    0.04588 =
         0.05520   -0.00148    0.00888   -0.01164
AFIX 137
H2A   2    0.769796    0.366765    0.356339    11.00000   -1.50000
H2B   2    0.828803    0.375787    0.300603    11.00000   -1.50000
H2C   2    0.782395    0.249650    0.314010    11.00000   -1.50000
AFIX   0
N2    3    0.414010    0.307703    0.279778    11.00000    0.01166    0.02445 =
         0.01981    0.00614   -0.01049    0.00350
AFIX  43
H2    2    0.442172    0.284644    0.323517    11.00000   -1.20000
AFIX   0
N1    3    0.582563    0.323616    0.277995    11.00000    0.03294    0.02404 =
         0.02626    0.00696   -0.00145   -0.00123
AFIX  43
H1    2    0.601330    0.287801    0.318959    11.00000   -1.20000
AFIX   0
O1    4    0.442285    0.371926    0.179254    11.00000    0.04251    0.03574 =
         0.02204    0.01122    0.00112    0.00477
O2    4    0.126123    0.330914    0.033136    11.00000    0.02802    0.01939 =
         0.01949   -0.00103   -0.00893    0.00645
O3    4   -0.013450    0.286718   -0.078133    11.00000    0.03069    0.01234 =
         0.02108   -0.00662   -0.01499   -0.00167
O4    4    0.165661    0.305897   -0.074797    11.00000    0.03795    0.03051 =
         0.02443    0.00197    0.00377    0.01035
O5    4    0.163613    0.542122    0.131352    11.00000    0.02528    0.01459 =
         0.01726    0.00108   -0.00324   -0.00057
N4    3    0.033954    0.404684    0.216682    11.00000    0.02318    0.01115 =
         0.01990   -0.00008   -0.00660    0.00217
N5    3    0.134340    0.208097    0.174552    11.00000    0.01901    0.01323 =
         0.01681   -0.00078   -0.00705    0.00340
O6    4   -0.070545    0.513953    0.058928    11.00000    0.02335    0.00945 =
         0.02637   -0.00081   -0.00985    0.00429
C16   1    0.299628    0.314663    0.249659    11.00000    0.01473    0.02197 =
         0.01954   -0.00242   -0.00910    0.00413
AFIX  23
H16A  2    0.279726    0.389901    0.222238    11.00000   -1.20000
H16B  2    0.270579    0.317605    0.288179    11.00000   -1.20000
AFIX   0
C17   1    0.660546    0.507930    0.241394    11.00000    0.05810    0.03487 =
         0.06248    0.00783    0.02588   -0.01444
AFIX 137
H17A  2    0.597581    0.528423    0.202511    11.00000   -1.50000
H17B  2    0.721335    0.535699    0.230676    11.00000   -1.50000
H17C  2    0.658908    0.547095    0.284296    11.00000   -1.50000
AFIX   0
C18   1    0.094090    0.191632    0.233140    11.00000    0.02610    0.01105 =
         0.01721    0.00311   -0.00844    0.00471
AFIX  23
H18A  2    0.146369    0.147335    0.271266    11.00000   -1.20000
H18B  2    0.030963    0.141199    0.216695    11.00000   -1.20000
AFIX   0
C19   1   -0.236362    0.146052    0.022347    11.00000    0.02455    0.02941 =
         0.03488   -0.00456   -0.01193   -0.00907
AFIX  43
H19   2   -0.309091    0.157653    0.003321    11.00000   -1.20000
AFIX   0
C20   1    0.665665    0.300246    0.182711    11.00000    0.04902    0.05277 =
         0.04001   -0.00356    0.01943   -0.01517
AFIX 137
H20A  2    0.666823    0.212999    0.189967    11.00000   -1.50000
H20B  2    0.726710    0.324241    0.171133    11.00000   -1.50000
H20C  2    0.602824    0.322366    0.144152    11.00000   -1.50000
AFIX   0
O8    4    0.170258    0.045266    0.412326    11.00000    0.14868    0.20975 =
         0.12521    0.00727    0.01431   -0.02818
HKLF 4

REM  test3 in P2(1)/n
REM R1 =  0.1038 for    3338 Fo > 4sig(Fo)  and  0.1246 for all    4417 data
REM    301 parameters refined using      0 restraints

END

WGHT      0.1712     10.6841

REM Highest difference peak  1.554,  deepest hole -0.608,  1-sigma level  0.141
Q1    1  -0.3579 -0.2276 -0.0503  11.00000  0.05    1.55
Q2    1   0.1660 -0.0219  0.5486  11.00000  0.05    1.38
Q3    1  -0.4923  0.3112 -0.0219  11.00000  0.05    0.99
Q4    1  -0.0018  0.3607  0.5141  11.00000  0.05    0.59
Q5    1   0.5043  0.5401  0.1904  11.00000  0.05    0.55
Q6    1   0.0837  0.4034  0.0723  11.00000  0.05    0.50
Q7    1  -0.4566  0.1145  0.0393  11.00000  0.05    0.49
Q8    1   0.1597  0.3862 -0.0530  11.00000  0.05    0.48
Q9    1  -0.2376  0.2200  0.0440  11.00000  0.05    0.48
Q10   1   0.0598  0.5943  0.2121  11.00000  0.05    0.47
Q11   1  -0.0418 -0.1241  0.0075  11.00000  0.05    0.45
Q12   1  -0.0295  0.1846  0.0533  11.00000  0.05    0.45
Q13   1  -0.2169  0.2148  0.0221  11.00000  0.05    0.43
Q14   1   0.8246  0.5134  0.2213  11.00000  0.05    0.42
Q15   1  -0.0219  0.5648  0.0518  11.00000  0.05    0.41
Q16   1   0.0531  0.2939 -0.0273  11.00000  0.05    0.41
Q17   1   0.1143 -0.0747  0.1764  11.00000  0.05    0.39
Q18   1   0.1264  0.6201  0.1127  11.00000  0.05    0.39
Q19   1  -0.0676  0.1267 -0.0090  11.00000  0.05    0.39
Q20   1   0.0216  0.1519  0.0132  11.00000  0.05    0.39
;
_shelx_res_checksum   11258

_shelx_hkl_file
;
   2   0   0   91991    5732                                                      100000    8.45    0.02  1.0000
   2   0   0   86743    5270                                                       94525    8.45    0.02  1.0000
  -2   0   0   84340    4998                                                       92015    8.45   -0.02  1.0000
   4   0   0     555     141                                                        1854  -12.74    0.27  1.0000
  -4   0   0     551     139                                                        1846  -12.74   -0.27  1.0000
   4   0   0     609     159                                                        1951  -12.74    0.27  1.0000
   4   0   0     583     135                                                        1905  -12.74    0.27  1.0000
  -4   0   0     541     137                                                        1828  -12.74   -0.27  1.0000
   6   0   0    2285      83                                                         452   17.35    0.24  1.0000
  -6   0   0    2252      90                                                         438   17.35   -0.24  1.0000
   6   0   0    2298      95                                                         458   17.35    0.24  1.0000
   6   0   0    2040      79                                                         347   17.35    0.24  1.0000
  -6   0   0    2194      89                                                         413   17.35   -0.24  1.0000
  -8   0   0   13860     822                                                       13154    1.99   -0.08  1.0000
   8   0   0   15190     924                                                       14448    1.99    0.08  1.0000
  -8   0   0   14969     802                                                       14234    1.99   -0.08  1.0000
   8   0   0   14080     839                                                       13366    1.99    0.08  1.0000
   8   0   0   16261     819                                                       15493    1.99    0.08  1.0000
  10   0   0    3495     305                                                        4203   -3.75    0.27  1.0000
  10   0   0    2727     283                                                        3356   -3.75    0.27  1.0000
 -10   0   0    3401     298                                                        4105   -3.75   -0.27  1.0000
 -10   0   0    3336     305                                                        4034   -3.75   -0.27  1.0000
  10   0   0    2320     304                                                        2903   -3.75    0.27  1.0000
  12   0   0    2692     326                                                        3595    5.29    0.36  1.0000
  12   0   0    3004     359                                                        3954    5.29    0.36  1.0000
  14   0   0     179     146                                                         369    3.82   -0.14  1.0000
  -1  -1   0   25952     680                                                       12544   32.11   -0.15  1.0000
  -1   1   0   28358     795                                                       14263   32.02    0.23  1.0000
   1   1   0   26057     725                                                       12614   32.11    0.15  1.0000
  -1   1   0   26305     688                                                       12818   32.02    0.23  1.0000
   1  -1   0   25795     718                                                       12467   32.02   -0.23  1.0000
  -2   1   0   49602    2119                                                       39308  -15.98   -0.40  1.0000
   2  -1   0   50335    2225                                                       39966  -15.98    0.40  1.0000
  -2  -1   0   49824    2109                                                       39513   15.98   -0.55  1.0000
   2   1   0   49275    2234                                                       39017   15.98    0.55  1.0000
   2  -1   0   54307    2440                                                       43514  -15.98    0.40  1.0000
  -3   1   0   34742    2652                                                       49207  -23.17   -0.14  1.0000
  -3  -1   0   34758    2641                                                       49200  -23.13    0.55  1.0000
   3   1   0   35738    2796                                                       50371  -23.13   -0.55  1.0000
  -3   1   0   34571    2738                                                       49004  -23.17   -0.14  1.0000
   3  -1   0   38966    3055                                                       54210  -23.17    0.14  1.0000
   3  -1   0   35663    2786                                                       50300  -23.17    0.14  1.0000
   3   1   0   35510    2690                                                       50100  -23.13   -0.55  1.0000
  -4  -1   0   18498    1276                                                       23179  -10.62   -0.08  1.0000
   4  -1   0   18483    1304                                                       23176   10.65   -0.02  1.0000
   4  -1   0   18661    1254                                                       23375   10.65   -0.02  1.0000
  -4   1   0   18661    1287                                                       23375   10.65    0.02  1.0000
   4   1   0   19027    1265                                                       23769  -10.62    0.08  1.0000
   4   1   0   18245    1313                                                       22894  -10.62    0.08  1.0000
  -4   1   0   18129    1246                                                       22779   10.65    0.02  1.0000
  -4  -1   0   18227    1236                                                       22875  -10.62   -0.08  1.0000
   4  -1   0   19068    1443                                                       23830   10.65   -0.02  1.0000
  -5  -1   0       9      65                                                         314    9.68   -0.10  1.0000
   5   1   0       7      69                                                         300    9.68    0.10  1.0000
   5  -1   0       4      55                                                         282    9.67    0.15  1.0000
  -5   1   0      11      73                                                         326    9.67   -0.15  1.0000
   5   1   0       2      61                                                         258    9.68    0.10  1.0000
   5  -1   0       9      61                                                         314    9.67    0.15  1.0000
   5  -1   0      25      96                                                         391    9.67    0.15  1.0000
  -5   1   0      13      75                                                         337    9.67   -0.15  1.0000
  -5  -1   0      10      63                                                         321    9.68   -0.10  1.0000
   5   1   0      22      77                                                         378    9.68    0.10  1.0000
   6   1   0    3739     255                                                        3622   -0.63    0.01  1.0000
   6  -1   0    3785     256                                                        3676    0.58   -0.08  1.0000
   6  -1   0    3908     305                                                        3797    0.58   -0.08  1.0000
  -6   1   0    4496     264                                                        4378    0.58    0.08  1.0000
  -6  -1   0    3765     253                                                        3647   -0.63   -0.01  1.0000
   6   1   0    4244     271                                                        4119   -0.63    0.01  1.0000
  -6   1   0    4232     270                                                        4117    0.58    0.08  1.0000
  -6  -1   0    3848     247                                                        3729   -0.63   -0.01  1.0000
   6  -1   0    3568     243                                                        3462    0.58   -0.08  1.0000
  -7  -1   0     996     157                                                        1667    6.08   -0.10  1.0000
   7  -1   0    1286     168                                                        2043    6.11    0.02  1.0000
  -7  -1   0     988     158                                                        1657    6.08   -0.10  1.0000
   7   1   0     936     163                                                        1591    6.08    0.10  1.0000
   7   1   0    1181     183                                                        1906    6.08    0.10  1.0000
  -7   1   0     963     169                                                        1629    6.11   -0.02  1.0000
   7  -1   0    1118     157                                                        1829    6.11    0.02  1.0000
   7  -1   0    1045     196                                                        1735    6.11    0.02  1.0000
   7   1   0     958     167                                                        1620    6.08    0.10  1.0000
  -7   1   0     911     164                                                        1561    6.11   -0.02  1.0000
  -8   1   0      89      98                                                         189   -2.84    0.03  1.0000
  -8  -1   0     151      93                                                         272    2.77    0.04  1.0000
   8   1   0     148      90                                                         269    2.77   -0.04  1.0000
  -8   1   0     103      95                                                         209   -2.84    0.03  1.0000
   8  -1   0      90      92                                                         191   -2.84   -0.03  1.0000
   8   1   0     114      86                                                         222    2.77   -0.04  1.0000
   8  -1   0     135      85                                                         254   -2.84   -0.03  1.0000
  -8  -1   0     140      94                                                         257    2.77    0.04  1.0000
   8  -1   0     115      79                                                         227   -2.84   -0.03  1.0000
   8   1   0     118      94                                                         227    2.77   -0.04  1.0000
   9  -1   0    2656     181                                                        1421   -9.04   -0.30  1.0000
   9   1   0    2153     155                                                        1061   -9.05   -0.03  1.0000
   9  -1   0    2397     152                                                        1233   -9.04   -0.30  1.0000
  -9   1   0    2369     168                                                        1217   -9.04    0.30  1.0000
  -9  -1   0    2321     155                                                        1180   -9.05    0.03  1.0000
   9  -1   0    2276     150                                                        1147   -9.04   -0.30  1.0000
  -9  -1   0    2191     153                                                        1088   -9.05    0.03  1.0000
  -9   1   0    2322     162                                                        1184   -9.04    0.30  1.0000
   9   1   0    2611     171                                                        1389   -9.05   -0.03  1.0000
   9   1   0    2368     166                                                        1213   -9.05   -0.03  1.0000
 -10  -1   0    2231     270                                                        2994    4.89    0.01  1.0000
  10  -1   0    2778     273                                                        3625   -4.90    0.17  1.0000
  10   1   0    2506     278                                                        3311    4.89   -0.01  1.0000
  10  -1   0    2774     280                                                        3620   -4.90    0.17  1.0000
  10  -1   0    2606     312                                                        3428   -4.90    0.17  1.0000
 -10   1   0    2745     299                                                        3588   -4.90   -0.17  1.0000
 -10   1   0    2349     274                                                        3133   -4.90   -0.17  1.0000
  10   1   0    2437     283                                                        3231    4.89   -0.01  1.0000
  10   1   0    2537     298                                                        3346    4.89   -0.01  1.0000
 -10  -1   0    2459     267                                                        3257    4.89    0.01  1.0000
  11   1   0    1299     208                                                        1515    1.87    0.32  1.0000
 -11   1   0    1324     223                                                        1531    1.81   -0.33  1.0000
  11   1   0     983     188                                                        1172    1.87    0.32  1.0000
  11  -1   0    1262     218                                                        1468    1.81    0.33  1.0000
  11  -1   0    1130     213                                                        1326    1.81    0.33  1.0000
 -11   1   0    1218     208                                                        1417    1.81   -0.33  1.0000
  11   1   0    1062     194                                                        1259    1.87    0.32  1.0000
  12  -1   0     391     134                                                         204    3.59    0.07  1.0000
  12   1   0     390     126                                                         205   -3.57    0.11  1.0000
  12   1   0     579     138                                                         347   -3.57    0.11  1.0000
 -12   1   0     286     142                                                         131    3.59   -0.07  1.0000
  12   1   0     495     125                                                         283   -3.57    0.11  1.0000
 -12   1   0     396     138                                                         208    3.59   -0.07  1.0000
  13   1   0     339     126                                                         197    2.86   -0.33  1.0000
  13   1   0     195     129                                                          92    2.86   -0.33  1.0000
  13  -1   0     287     146                                                         157    2.90   -0.05  1.0000
  14   1   0     416     154                                                         421    0.08    0.04  1.0000
  14  -1   0     410     175                                                         413   -0.06    0.07  1.0000
  15  -1   0     155     153                                                         230   -1.77   -0.06  1.0000
  16  -1   0     236     171                                                         329   -1.81   -0.02  1.0000
   0   2   0   19892     913                                                       14494   13.50   -0.12  1.0000
   0   2   0   19993     833                                                       14581   13.50   -0.12  1.0000
   0   2   0   20890     791                                                       15348   13.50   -0.12  1.0000
  -1   2   0    7282     310                                                        5236    8.48    0.31  1.0000
  -1   2   0    7569     316                                                        5480    8.48    0.31  1.0000
   1   2   0    7439     320                                                        5305   -8.77   -0.27  1.0000
  -1   2   0    7950     359                                                        5805    8.48    0.31  1.0000
   1   2   0    7259     294                                                        5153   -8.77   -0.27  1.0000
   1   2   0    7382     308                                                        5257   -8.77   -0.27  1.0000
  -1   2   0    7249     304                                                        5208    8.48    0.31  1.0000
   2   2   0    1786      62                                                         238  -17.54    0.15  1.0000
   2   2   0    1753      60                                                         226  -17.54    0.15  1.0000
  -2   2   0    1600      74                                                         173  -17.55   -0.03  1.0000
  -2   2   0    1544      57                                                         155  -17.55   -0.03  1.0000
   2   2   0    1730      61                                                         218  -17.54    0.15  1.0000
   2  -2   0    1756      41                                                         227  -17.55    0.03  1.0000
  -2   2   0    1509      56                                                         144  -17.55   -0.03  1.0000
  -2  -2   0    1758      40                                                         228  -17.54   -0.15  1.0000
   3  -2   0   66908    3292                                                       62721    5.38   -0.12  1.0000
  -3  -2   0   65804    3120                                                       61467   -5.63    0.30  1.0000
   3   2   0   58826    3583                                                       54722   -5.63   -0.30  1.0000
   3   2   0   64231    3183                                                       59939   -5.63   -0.30  1.0000
   3   2   0   62497    3308                                                       58265   -5.63   -0.30  1.0000
  -3   2   0   64424    3241                                                       60314    5.38    0.12  1.0000
  -3   2   0   63147    3138                                                       59078    5.38    0.12  1.0000
   4   2   0    2014     149                                                        1817   -1.47    0.03  1.0000
  -4   2   0    2003     150                                                        1801   -1.52   -0.03  1.0000
   4   2   0    2243     155                                                        2034   -1.47    0.03  1.0000
   4  -2   0    2299     194                                                        2082   -1.52    0.03  1.0000
  -4   2   0    2001     146                                                        1799   -1.52   -0.03  1.0000
   4   2   0    1847     142                                                        1658   -1.47    0.03  1.0000
   4  -2   0    2209     130                                                        1996   -1.52    0.03  1.0000
  -4  -2   0    2358     132                                                        2144   -1.47   -0.03  1.0000
   4  -2   0    2217     134                                                        2004   -1.52    0.03  1.0000
   5   2   0   52979    2939                                                       53286    0.43    0.28  1.0000
  -5  -2   0   50239    2766                                                       50531    0.43   -0.28  1.0000
   5  -2   0   54584    2809                                                       54804   -0.31    0.07  1.0000
  -5   2   0   50994    2787                                                       51209   -0.31   -0.07  1.0000
  -5  -2   0   50689    2857                                                       50982    0.43   -0.28  1.0000
   5  -2   0   53142    2919                                                       53359   -0.31    0.07  1.0000
   5  -2   0   53174    3220                                                       53391   -0.31    0.07  1.0000
  -5   2   0   50788    2877                                                       51002   -0.31   -0.07  1.0000
   5   2   0   54021    2828                                                       54331    0.43    0.28  1.0000
   6   2   0    3874     318                                                        4544    3.38    0.39  1.0000
  -6  -2   0    4058     289                                                        4743    3.38   -0.39  1.0000
   6  -2   0    4516     307                                                        5241    3.40   -0.11  1.0000
  -6   2   0    3873     315                                                        4547    3.40    0.11  1.0000
   6   2   0    3994     309                                                        4674    3.38    0.39  1.0000
   6  -2   0    4160     292                                                        4857    3.40   -0.11  1.0000
  -6   2   0    3822     306                                                        4491    3.40    0.11  1.0000
  -6  -2   0    3959     296                                                        4636    3.38   -0.39  1.0000
   6  -2   0    3706     368                                                        4366    3.40   -0.11  1.0000
   7   2   0    7358     412                                                        6416   -3.71   -0.01  1.0000
  -7   2   0    6595     401                                                        5704    3.72   -0.05  1.0000
   7  -2   0    6968     375                                                        6051    3.72    0.05  1.0000
  -7  -2   0    7218     372                                                        6285   -3.71    0.01  1.0000
   7   2   0    6758     394                                                        5856   -3.71   -0.01  1.0000
   7  -2   0    8182     489                                                        7186    3.72    0.05  1.0000
  -7   2   0    6635     390                                                        5742    3.72   -0.05  1.0000
  -7  -2   0    7058     382                                                        6136   -3.71    0.01  1.0000
   7  -2   0    7577     394                                                        6619    3.72    0.05  1.0000
   8   2   0     546     160                                                        1318   -8.46    0.04  1.0000
  -8   2   0     698     180                                                        1553   -8.48   -0.29  1.0000
   8  -2   0     880     161                                                        1818   -8.48    0.29  1.0000
   8  -2   0     623     146                                                        1439   -8.48    0.29  1.0000
  -8  -2   0     832     160                                                        1745   -8.46   -0.04  1.0000
   8  -2   0     695     210                                                        1547   -8.48    0.29  1.0000
  -8   2   0     696     177                                                        1549   -8.48   -0.29  1.0000
  -8  -2   0     693     156                                                        1541   -8.46   -0.04  1.0000
   8   2   0     621     171                                                        1433   -8.46    0.04  1.0000
  -9  -2   0     370     119                                                         613   -3.60    0.00  1.0000
  -9  -2   0     287     110                                                         504   -3.60    0.00  1.0000
   9  -2   0     378     158                                                         619    3.56    0.14  1.0000
   9   2   0     330     124                                                         561   -3.60    0.00  1.0000
   9  -2   0     570     131                                                         860    3.56    0.14  1.0000
  -9   2   0     355     137                                                         590    3.56   -0.14  1.0000
   9  -2   0     367     107                                                         605    3.56    0.14  1.0000
  -9   2   0     393     137                                                         638    3.56   -0.14  1.0000
   9   2   0     348     123                                                         584   -3.60    0.00  1.0000
   9   2   0     304     121                                                         526   -3.60    0.00  1.0000
  10   2   0      87     121                                                         308   -5.39    0.45  1.0000
 -10   2   0      18     124                                                         163   -5.57    0.03  1.0000
  10  -2   0      69     144                                                         282   -5.57   -0.03  1.0000
 -10   2   0      43     129                                                         227   -5.57    0.03  1.0000
  10   2   0     118     110                                                         364   -5.39    0.45  1.0000
  10   2   0      24     109                                                         172   -5.39    0.45  1.0000
 -11   2   0     382     148                                                         249   -2.46   -0.15  1.0000
  11   2   0     438     118                                                         295    2.48   -0.11  1.0000
  11   2   0     419     124                                                         279    2.48   -0.11  1.0000
  11  -2   0     358     134                                                         231   -2.46    0.15  1.0000
 -11   2   0     398     133                                                         262   -2.46   -0.15  1.0000
  11   2   0     521     137                                                         363    2.48   -0.11  1.0000
 -12   2   0     223     135                                                          86    3.71   -0.12  1.0000
  12   2   0     344     125                                                         161    3.85    0.70  1.0000
  12   2   0     252     123                                                         100    3.85    0.70  1.0000
  12  -2   0     454     155                                                         244    3.71    0.12  1.0000
 -12   2   0      32     129                                                        -115    3.71   -0.12  1.0000
  12   2   0     379     114                                                         185    3.85    0.70  1.0000
  13  -2   0    2071     294                                                        2117    0.33    0.06  1.0000
  13   2   0    1888     253                                                        1938   -0.37    0.02  1.0000
 -13   2   0    2561     298                                                        2612    0.33   -0.06  1.0000
 -13   2   0    2076     287                                                        2122    0.33   -0.06  1.0000
  13   2   0    2439     286                                                        2495   -0.37    0.02  1.0000
  13   2   0    2000     244                                                        2051   -0.37    0.02  1.0000
  14  -2   0      45     149                                                         -29   -4.40   -0.19  1.0000
  14   2   0       7     134                                                          87   -4.42   -0.06  1.0000
  15  -2   0     611     215                                                         578   -0.44   -0.03  1.0000
  -1   3   0     292      42                                                         100    9.49   -0.33  1.0000
  -1   3   0     265      49                                                          70    9.49   -0.33  1.0000
   1   3   0     210      33                                                          -2    9.47    0.06  1.0000
  -1   3   0     294      40                                                         102    9.49   -0.33  1.0000
   1   3   0     311      53                                                         125    9.47    0.06  1.0000
  -1   3   0     245      71                                                          47    9.49   -0.33  1.0000
  -1   3   0     271      51                                                          77    9.49   -0.33  1.0000
   1   3   0     223      48                                                          23    9.47    0.06  1.0000
   1   3   0     283      47                                                          94    9.47    0.06  1.0000
   1   3   0     255      41                                                          62    9.47    0.06  1.0000
  -2   3   0    7130     658                                                       11672   15.43    0.10  1.0000
   2   3   0    7319     620                                                       11837  -15.20    0.06  1.0000
  -2   3   0    6998     741                                                       11503   15.43    0.10  1.0000
   2   3   0    6898     671                                                       11299  -15.20    0.06  1.0000
   2   3   0    6928     728                                                       11338  -15.20    0.06  1.0000
   2   3   0    7082     646                                                       11534  -15.20    0.06  1.0000
  -2   3   0    6839     636                                                       11298   15.43    0.10  1.0000
  -3   3   0    6276     817                                                       12605  -21.61    0.14  1.0000
   3   3   0    5640     791                                                       11685  -21.58   -0.25  1.0000
  -3  -3   0    6842     678                                                       13392  -21.58    0.25  1.0000
   3  -3   0    6117     716                                                       12379  -21.61   -0.14  1.0000
   3   3   0    6502     741                                                       12912  -21.58   -0.25  1.0000
  -3   3   0    6421     704                                                       12811  -21.61    0.14  1.0000
   3   3   0    6419     712                                                       12795  -21.58   -0.25  1.0000
  -4  -3   0   23319    1121                                                       20946    5.23   -0.36  1.0000
  -4  -3   0   25150    1165                                                       22683    5.23   -0.36  1.0000
   4   3   0   21549    1296                                                       19263    5.23    0.36  1.0000
   4   3   0   22824    1161                                                       20470    5.23    0.36  1.0000
   4  -3   0   23492    1139                                                       21115   -5.21    0.24  1.0000
  -4   3   0   23248    1148                                                       20879   -5.21   -0.24  1.0000
   4  -3   0   24463    1185                                                       22036   -5.21    0.24  1.0000
  -4   3   0   23898    1187                                                       21495   -5.21   -0.24  1.0000
   4   3   0   23328    1209                                                       20947    5.23    0.36  1.0000
  -5   3   0    1290     148                                                        1453   -1.44    0.16  1.0000
  -5  -3   0    1216     115                                                        1373   -1.43   -0.08  1.0000
   5  -3   0    1426     203                                                        1597   -1.44   -0.16  1.0000
   5  -3   0    1350     115                                                        1517   -1.44   -0.16  1.0000
   5   3   0    1143     138                                                        1295   -1.43    0.08  1.0000
  -5  -3   0    1175     118                                                        1330   -1.43   -0.08  1.0000
   5   3   0    1076     139                                                        1224   -1.43    0.08  1.0000
  -5   3   0    1151     143                                                        1305   -1.44    0.16  1.0000
   5   3   0    1272     140                                                        1432   -1.43    0.08  1.0000
   5  -3   0    1305     116                                                        1469   -1.44   -0.16  1.0000
  -6  -3   0    9575     438                                                        7523    7.27    0.02  1.0000
  -6   3   0    9412     468                                                        7310   -7.53    0.04  1.0000
  -6   3   0    9208     480                                                        7130   -7.53    0.04  1.0000
   6   3   0   10098     477                                                        7988    7.27   -0.02  1.0000
   6  -3   0   10671     449                                                        8423   -7.53   -0.04  1.0000
   6  -3   0    9793     569                                                        7645   -7.53   -0.04  1.0000
   6  -3   0   10130     464                                                        7943   -7.53   -0.04  1.0000
  -6  -3   0    9707     452                                                        7640    7.27    0.02  1.0000
   6   3   0   10070     494                                                        7963    7.27   -0.02  1.0000
   6   3   0    9833     516                                                        7752    7.27   -0.02  1.0000
  -7  -3   0    1402     115                                                        1019    3.63   -0.32  1.0000
   7   3   0    1455     136                                                        1061    3.63    0.32  1.0000
   7   3   0    1546     139                                                        1139    3.63    0.32  1.0000
   7  -3   0    1590     201                                                        1174    3.66    0.09  1.0000
   7  -3   0    1475     111                                                        1076    3.66    0.09  1.0000
   7   3   0    1435     135                                                        1044    3.63    0.32  1.0000
  -7   3   0    1213     138                                                         855    3.66   -0.09  1.0000
  -7   3   0    1313     138                                                         939    3.66   -0.09  1.0000
  -7  -3   0    1367     114                                                         989    3.63   -0.32  1.0000
   7  -3   0    1451     120                                                        1055    3.66    0.09  1.0000
  -8   3   0     625     159                                                        1045    4.82   -0.17  1.0000
   8  -3   0     612     125                                                        1030    4.82    0.17  1.0000
  -8   3   0     576     150                                                         982    4.82   -0.17  1.0000
   8  -3   0     583     117                                                         993    4.82    0.17  1.0000
   8  -3   0     573     198                                                         979    4.82    0.17  1.0000
  -8  -3   0     518     122                                                         911   -4.86   -0.17  1.0000
   8   3   0     494     148                                                         877   -4.86    0.17  1.0000
   8   3   0     510     136                                                         898   -4.86    0.17  1.0000
   8   3   0     542     144                                                         940   -4.86    0.17  1.0000
   9   3   0    1018     204                                                        1982   -8.26   -0.07  1.0000
   9  -3   0     770     236                                                        1632   -8.28   -0.08  1.0000
   9   3   0     770     189                                                        1629   -8.26   -0.07  1.0000
  -9   3   0     909     204                                                        1831   -8.28    0.08  1.0000
  -9   3   0     932     208                                                        1863   -8.28    0.08  1.0000
   9   3   0     884     191                                                        1794   -8.26   -0.07  1.0000
 -10   3   0     311     140                                                         407   -1.66    0.05  1.0000
  10   3   0     433     133                                                         545    1.67   -0.19  1.0000
 -10   3   0     352     144                                                         453   -1.66    0.05  1.0000
  10  -3   0     338     177                                                         438   -1.66   -0.05  1.0000
  10   3   0     502     145                                                         623    1.67   -0.19  1.0000
  10   3   0     288     128                                                         381    1.67   -0.19  1.0000
 -11   3   0     701     174                                                         641    0.76   -0.17  1.0000
 -11   3   0     601     171                                                         546    0.76   -0.17  1.0000
  11  -3   0     515     190                                                         463    0.76    0.17  1.0000
  11   3   0     306     120                                                         262    0.84    0.38  1.0000
  11   3   0     618     154                                                         555    0.84    0.38  1.0000
  11   3   0     589     145                                                         527    0.84    0.38  1.0000
 -12   3   0     570     183                                                         671   -1.32   -0.03  1.0000
  12   3   0     388     158                                                         471    1.32    0.06  1.0000
  12   3   0     324     133                                                         400    1.32    0.06  1.0000
  12  -3   0     307     192                                                         381   -1.32    0.03  1.0000
  12   3   0     352     151                                                         431    1.32    0.06  1.0000
 -12   3   0     564     181                                                         664   -1.32   -0.03  1.0000
  13   3   0     297     148                                                         243    1.09   -0.16  1.0000
  13  -3   0     201     143                                                         157    1.09   -0.17  1.0000
  13   3   0     139     142                                                         103    1.09   -0.16  1.0000
 -13   3   0     251     165                                                         201    1.09    0.17  1.0000
 -13   3   0     108     143                                                          76    1.09    0.17  1.0000
 -14   3   0     318     178                                                         348   -0.53   -0.15  1.0000
  14   3   0     385     173                                                         420    0.56    0.15  1.0000
  14  -3   0     539     217                                                         576   -0.53    0.15  1.0000
  14   3   0     417     183                                                         453    0.56    0.15  1.0000
  15  -3   0      99     182                                                         202   -2.79    0.03  1.0000
   0   4   0   12468     354                                                        6164   21.69    0.18  1.0000
   0   4   0   12049     358                                                        5871   21.69    0.18  1.0000
   0   4   0   12111     344                                                        5914   21.69    0.18  1.0000
   0   4   0   12322     342                                                        6062   21.69    0.18  1.0000
   0   4   0   10889     399                                                        5070   21.69    0.18  1.0000
  -1   4   0     590      90                                                         383   -3.08    0.06  1.0000
   1   4   0     722      83                                                         515    2.73   -0.04  1.0000
   1   4   0     672      70                                                         473    2.73   -0.04  1.0000
  -1   4   0     911      89                                                         649   -3.08    0.06  1.0000
  -1   4   0     607      67                                                         397   -3.08    0.06  1.0000
   1   4   0     629      76                                                         437    2.73   -0.04  1.0000
  -1   4   0     890      90                                                         631   -3.08    0.06  1.0000
  -1   4   0     659      64                                                         439   -3.08    0.06  1.0000
   1   4   0     715      74                                                         509    2.73   -0.04  1.0000
  -2   4   0   14753    1014                                                       19221  -11.23   -0.27  1.0000
  -2   4   0   13069    1051                                                       17292  -11.23   -0.27  1.0000
   2   4   0   13921    1001                                                       18267  -11.22   -0.15  1.0000
  -2   4   0   14084    1180                                                       18456  -11.23   -0.27  1.0000
   2   4   0   14555    1036                                                       18992  -11.22   -0.15  1.0000
   2   4   0   13886    1172                                                       18227  -11.22   -0.15  1.0000
   2   4   0   14407    1078                                                       18823  -11.22   -0.15  1.0000
   2   4   0   14545    1034                                                       18981  -11.22   -0.15  1.0000
  -2   4   0   14816    1056                                                       19293  -11.23   -0.27  1.0000
  -2   4   0   14980    1023                                                       19480  -11.23   -0.27  1.0000
   3   4   0     479      50                                                         288    3.21   -0.29  1.0000
  -3   4   0     441     101                                                         251   -3.36    0.17  1.0000
  -3   4   0     394      72                                                         216   -3.36    0.17  1.0000
   3   4   0     352      80                                                         192    3.21   -0.29  1.0000
  -3   4   0     382      70                                                         207   -3.36    0.17  1.0000
   3   4   0     528      71                                                         326    3.21   -0.29  1.0000
   3  -4   0     447      50                                                         256   -3.36   -0.17  1.0000
   3   4   0     426      74                                                         247    3.21   -0.29  1.0000
  -4   4   0    2170     301                                                        4754  -14.62   -0.09  1.0000
  -4  -4   0    2053     269                                                        4556  -14.51    0.18  1.0000
  -4   4   0    1714     348                                                        4066  -14.62   -0.09  1.0000
   4  -4   0    2075     268                                                        4613  -14.62    0.09  1.0000
   4   4   0    1959     308                                                        4416  -14.51   -0.18  1.0000
   4  -4   0    1997     278                                                        4495  -14.62    0.09  1.0000
  -4  -4   0    2144     262                                                        4692  -14.51    0.18  1.0000
   4   4   0    1919     327                                                        4356  -14.51   -0.18  1.0000
   4   4   0    1991     299                                                        4464  -14.51   -0.18  1.0000
   5  -4   0    3368     227                                                        3671   -1.67    0.18  1.0000
  -5   4   0    3001     256                                                        3289   -1.67   -0.18  1.0000
  -5  -4   0    2893     218                                                        3197    1.81   -0.14  1.0000
   5  -4   0    3240     320                                                        3538   -1.67    0.18  1.0000
  -5   4   0    3125     249                                                        3418   -1.67   -0.18  1.0000
   5   4   0    2970     250                                                        3279    1.81    0.14  1.0000
   5   4   0    3121     258                                                        3438    1.81    0.14  1.0000
   5   4   0    3047     266                                                        3360    1.81    0.14  1.0000
   5  -4   0    3253     218                                                        3551   -1.67    0.18  1.0000
  -5  -4   0    3111     213                                                        3426    1.81   -0.14  1.0000
   6  -4   0   13064     907                                                       15756    7.34   -0.09  1.0000
   6  -4   0   13469     875                                                       16201    7.34   -0.09  1.0000
  -6   4   0   13057     929                                                       15750    7.34    0.09  1.0000
   6   4   0   13149     911                                                       15867    7.39   -0.18  1.0000
   6   4   0   12545    1004                                                       15203    7.39   -0.18  1.0000
   6  -4   0   14266    1077                                                       17074    7.34   -0.09  1.0000
   6   4   0   12798     944                                                       15481    7.39   -0.18  1.0000
  -6  -4   0   12710     887                                                       15387    7.39    0.18  1.0000
  -6   4   0   13612     903                                                       16359    7.34    0.09  1.0000
  -7   4   0     275      91                                                         111    3.98   -0.04  1.0000
   7  -4   0     247      52                                                          93    3.98    0.04  1.0000
   7  -4   0     284      53                                                         116    3.98    0.04  1.0000
   7   4   0     379      79                                                         180   -3.96   -0.06  1.0000
   7  -4   0      37     102                                                         -24    3.98    0.04  1.0000
  -7  -4   0     239      56                                                          89   -3.96    0.06  1.0000
  -7   4   0     254      85                                                          98    3.98   -0.04  1.0000
   7   4   0     231      76                                                          84   -3.96   -0.06  1.0000
   7   4   0     313      77                                                         136   -3.96   -0.06  1.0000
   8   4   0    2842     238                                                        2860    0.12   -0.10  1.0000
   8  -4   0    2224     288                                                        2237    0.10   -0.14  1.0000
   8   4   0    2696     238                                                        2714    0.12   -0.10  1.0000
  -8   4   0    2684     233                                                        2700    0.10    0.14  1.0000
  -8   4   0    2467     238                                                        2483    0.10    0.14  1.0000
   8   4   0    2418     228                                                        2435    0.12   -0.10  1.0000
   9  -4   0    1568     280                                                        1863   -2.34    0.20  1.0000
   9   4   0    1830     220                                                        2156    2.39    0.10  1.0000
  -9   4   0    1871     225                                                        2193   -2.34   -0.20  1.0000
  -9   4   0    2313     253                                                        2670   -2.34   -0.20  1.0000
   9   4   0    1841     220                                                        2168    2.39    0.10  1.0000
   9   4   0    1879     223                                                        2209    2.39    0.10  1.0000
  10   4   0    1277     171                                                         949   -3.23   -0.08  1.0000
 -10   4   0    1558     196                                                        1201   -3.16   -0.03  1.0000
 -10   4   0    1582     196                                                        1222   -3.16   -0.03  1.0000
  10  -4   0    1381     243                                                        1046   -3.16    0.03  1.0000
  10   4   0    1096     164                                                         794   -3.23   -0.08  1.0000
  10   4   0    1449     187                                                        1098   -3.23   -0.08  1.0000
  11   4   0      24     117                                                         122    4.02   -0.09  1.0000
  11  -4   0      32     175                                                         138   -3.99    0.15  1.0000
  11   4   0      79     137                                                         226    4.02   -0.09  1.0000
  11   4   0      49     133                                                         173    4.02   -0.09  1.0000
 -11   4   0      47     143                                                         168   -3.99   -0.15  1.0000
 -11   4   0       5     133                                                          16   -3.99   -0.15  1.0000
  12   4   0    1644     269                                                        2044    3.05    0.03  1.0000
 -12   4   0    1802     270                                                        2219    3.05   -0.06  1.0000
  12  -4   0    1892     332                                                        2320    3.05    0.06  1.0000
  12   4   0    1705     259                                                        2112    3.05    0.03  1.0000
 -12   4   0    1891     288                                                        2318    3.05   -0.06  1.0000
  13   4   0     320     172                                                         517   -3.16   -0.03  1.0000
  13   4   0     263     177                                                         443   -3.16   -0.03  1.0000
  13  -4   0     154     204                                                         296    3.12    0.08  1.0000
 -13   4   0     284     179                                                         467    3.12   -0.08  1.0000
 -13   4   0      96     157                                                         212    3.12   -0.08  1.0000
 -14   4   0    1009     237                                                        1183    1.72   -0.10  1.0000
  14  -4   0     819     252                                                         976    1.72    0.10  1.0000
  14   4   0    1110     245                                                        1293    1.72    0.01  1.0000
  14   4   0     963     241                                                        1134    1.72    0.01  1.0000
 -14   4   0     694     228                                                         839    1.72   -0.10  1.0000
  15   4   0     268     177                                                         198    1.51    0.04  1.0000
  15  -4   0     396     236                                                         311   -1.48    0.12  1.0000
  15   4   0     439     188                                                         348    1.51    0.04  1.0000
   1   5   0    4090     364                                                        6175    9.58   -0.13  1.0000
   1   5   0    3884     351                                                        5921    9.58   -0.13  1.0000
  -1   5   0    3847     361                                                        5891    9.66   -0.37  1.0000
  -1   5   0    3570     362                                                        5547    9.66   -0.37  1.0000
  -1   5   0    3902     373                                                        5959    9.66   -0.37  1.0000
   1   5   0    3997     367                                                        6060    9.58   -0.13  1.0000
  -1   5   0    4068     353                                                        6163    9.66   -0.37  1.0000
   1   5   0    3789     379                                                        5803    9.58   -0.13  1.0000
  -1   5   0    3505     425                                                        5465    9.66   -0.37  1.0000
   2   5   0   28411    1651                                                       29814    2.68    0.55  1.0000
  -2   5   0   28129    1562                                                       29481   -2.60   -0.47  1.0000
   2   5   0   27932    1543                                                       29323    2.68    0.55  1.0000
  -2   5   0   28755    1566                                                       30122   -2.60   -0.47  1.0000
  -2   5   0   28021    1616                                                       29371   -2.60   -0.47  1.0000
   2   5   0   24848    1793                                                       26161    2.68    0.55  1.0000
   2   5   0   27793    1593                                                       29181    2.68    0.55  1.0000
  -2   5   0   25461    1619                                                       26748   -2.60   -0.47  1.0000
  -2   5   0   28196    1807                                                       29550   -2.60   -0.47  1.0000
   2   5   0   27981    1588                                                       29373    2.68    0.55  1.0000
  -3   5   0      20      71                                                          12    0.69    0.31  1.0000
   3   5   0       2      41                                                         -29    0.68    0.48  1.0000
   3  -5   0       1      35                                                         -26    0.69   -0.31  1.0000
   3   5   0      82      65                                                          66    0.68    0.48  1.0000
   3   5   0      80      90                                                          65    0.68    0.48  1.0000
  -3   5   0       1      83                                                         -11    0.69    0.31  1.0000
  -3   5   0      22      68                                                          14    0.69    0.31  1.0000
   3   5   0      47      41                                                          35    0.68    0.48  1.0000
   3   5   0      84      71                                                          68    0.68    0.48  1.0000
  -3   5   0       1      33                                                          -5    0.69    0.31  1.0000
   4   5   0    1513     171                                                        1725    1.73   -0.01  1.0000
   4  -5   0    1567     137                                                        1767   -1.60   -0.17  1.0000
  -4  -5   0    1574     128                                                        1791    1.73    0.01  1.0000
  -4   5   0    1526     173                                                        1722   -1.60    0.17  1.0000
   4   5   0    1505     166                                                        1717    1.73   -0.01  1.0000
  -4   5   0    1296     197                                                        1477   -1.60    0.17  1.0000
   4  -5   0    1481     132                                                        1676   -1.60   -0.17  1.0000
  -4   5   0    1558     167                                                        1756   -1.60    0.17  1.0000
   4   5   0    1630     191                                                        1850    1.73   -0.01  1.0000
  -5   5   0    1308     134                                                         897    4.07   -0.17  1.0000
  -5  -5   0    1220      87                                                         826    4.05   -0.37  1.0000
   5   5   0    1356     133                                                         938    4.05    0.37  1.0000
  -5  -5   0    1215      88                                                         822    4.05   -0.37  1.0000
  -5   5   0    1355     171                                                         936    4.07   -0.17  1.0000
   5  -5   0    1294      95                                                         885    4.07    0.17  1.0000
   5   5   0    1268     134                                                         865    4.05    0.37  1.0000
   5  -5   0    1321      92                                                         907    4.07    0.17  1.0000
  -5   5   0    1378     136                                                         955    4.07   -0.17  1.0000
   5   5   0    1427     132                                                         997    4.05    0.37  1.0000
  -6   5   0     269     102                                                         335    1.25   -0.14  1.0000
   6  -5   0     380     139                                                         457    1.25    0.14  1.0000
   6  -5   0     503      82                                                         591    1.25    0.14  1.0000
   6   5   0     353     101                                                         429   -1.26    0.04  1.0000
   6   5   0     437     111                                                         521   -1.26    0.04  1.0000
  -6  -5   0     390      77                                                         469   -1.26   -0.04  1.0000
   6  -5   0     592      89                                                         687    1.25    0.14  1.0000
  -6   5   0     385     104                                                         464    1.25   -0.14  1.0000
   6   5   0     419     111                                                         501   -1.26    0.04  1.0000
   7   5   0    5215     348                                                        4624    2.75    0.14  1.0000
   7  -5   0    4123     390                                                        3591    2.80    0.06  1.0000
   7   5   0    5371     341                                                        4771    2.75    0.14  1.0000
  -7   5   0    5446     326                                                        4833    2.80   -0.06  1.0000
  -7   5   0    5283     339                                                        4679    2.80   -0.06  1.0000
   7   5   0    4922     326                                                        4348    2.75    0.14  1.0000
  -8   5   0     111     103                                                         137    0.76    0.00  1.0000
   8   5   0      13      89                                                          23   -0.80   -0.29  1.0000
   8   5   0     218      97                                                         256   -0.80   -0.29  1.0000
   8  -5   0      42     141                                                          58    0.76    0.00  1.0000
  -8   5   0     123      93                                                         150    0.76    0.00  1.0000
   8   5   0     125      92                                                         154   -0.80   -0.29  1.0000
   9   5   0    2494     259                                                        2687   -1.24   -0.04  1.0000
   9   5   0    2608     264                                                        2805   -1.24   -0.04  1.0000
  -9   5   0    2676     274                                                        2866   -1.18   -0.03  1.0000
   9   5   0    2741     265                                                        2943   -1.24   -0.04  1.0000
  -9   5   0    2927     270                                                        3125   -1.18   -0.03  1.0000
   9  -5   0    2190     326                                                        2361   -1.18    0.03  1.0000
  10   5   0    3687     270                                                        2568    6.56    0.11  1.0000
 -10   5   0    4366     284                                                        3133   -6.60   -0.02  1.0000
  10   5   0    4324     288                                                        3104    6.56    0.11  1.0000
  10  -5   0    3218     338                                                        2174   -6.60    0.02  1.0000
 -10   5   0    3835     283                                                        2686   -6.60   -0.02  1.0000
  11   5   0    1793     211                                                        1228    4.78    0.06  1.0000
 -11   5   0    1831     214                                                        1260    4.77    0.08  1.0000
  11  -5   0    1759     290                                                        1202    4.77   -0.08  1.0000
 -11   5   0    1855     224                                                        1280    4.77    0.08  1.0000
  11   5   0    1459     190                                                         954    4.78    0.06  1.0000
 -12   5   0     366     152                                                         206    3.21   -0.03  1.0000
  12   5   0     287     145                                                         149   -3.19    0.01  1.0000
  12  -5   0      68     198                                                          12    3.21    0.03  1.0000
 -12   5   0     334     157                                                         182    3.21   -0.03  1.0000
  12   5   0     266     140                                                         134   -3.19    0.01  1.0000
  13   5   0    1043     221                                                         942    1.05   -0.05  1.0000
  13   5   0    1382     235                                                        1265    1.05   -0.05  1.0000
 -13   5   0    1411     246                                                        1300    0.98    0.02  1.0000
  13  -5   0    1423     302                                                        1312    0.98   -0.02  1.0000
 -13   5   0    1236     222                                                        1132    0.98    0.02  1.0000
  14   5   0     101     155                                                          13   -4.21    0.01  1.0000
  14  -5   0     191     203                                                          54    4.24    0.10  1.0000
 -14   5   0     186     177                                                          51    4.24   -0.10  1.0000
 -14   5   0     363     160                                                         158    4.24   -0.10  1.0000
  14   5   0     114     140                                                          18   -4.21    0.01  1.0000
  15   5   0     145     176                                                         223   -1.92    0.05  1.0000
 -15   5   0     131     182                                                         206   -1.92   -0.01  1.0000
  15   5   0     163     180                                                         246   -1.92    0.05  1.0000
 -15   5   0      86     186                                                         148   -1.92   -0.01  1.0000
  16   5   0      27     177                                                          42    1.14   -0.15  1.0000
   0   6   0   19762    1144                                                       20976    2.78   -0.50  1.0000
   0   6   0   19251    1128                                                       20449    2.78   -0.50  1.0000
   0   6   0   19397    1167                                                       20599    2.78   -0.50  1.0000
   0   6   0   18932    1185                                                       20120    2.78   -0.50  1.0000
   0   6   0   19675    1316                                                       20886    2.78   -0.50  1.0000
  -1   6   0    2330     209                                                        2819    3.16   -0.08  1.0000
  -1   6   0    2275     223                                                        2759    3.16   -0.08  1.0000
   1   6   0    2426     214                                                        2932   -3.20   -0.17  1.0000
  -1   6   0    2134     252                                                        2603    3.16   -0.08  1.0000
   1   6   0    2509     208                                                        3024   -3.20   -0.17  1.0000
   1   6   0    2316     226                                                        2811   -3.20   -0.17  1.0000
  -1   6   0    2508     220                                                        3014    3.16   -0.08  1.0000
   1   6   0    2329     218                                                        2826   -3.20   -0.17  1.0000
  -1   6   0    2466     203                                                        2968    3.16   -0.08  1.0000
   2   6   0     484      63                                                         260    3.91   -0.23  1.0000
   2   6   0     417      63                                                         211    3.91   -0.23  1.0000
  -2   6   0     423      57                                                         220    3.81   -0.23  1.0000
  -2   6   0     532      86                                                         301    3.81   -0.23  1.0000
   2   6   0     637      90                                                         375    3.91   -0.23  1.0000
  -2   6   0     443      86                                                         235    3.81   -0.23  1.0000
  -2   6   0     461      59                                                         248    3.81   -0.23  1.0000
  -2   6   0     477     104                                                         260    3.81   -0.23  1.0000
   2   6   0     421      82                                                         214    3.91   -0.23  1.0000
   2   6   0     281      99                                                         118    3.91   -0.23  1.0000
  -3   6   0    6283     389                                                        5752   -2.24    0.00  1.0000
  -3   6   0    6436     380                                                        5898   -2.24    0.00  1.0000
  -3   6   0    6210     341                                                        5682   -2.24    0.00  1.0000
   3   6   0    6342     381                                                        5804    2.26   -0.03  1.0000
  -3   6   0    5715     434                                                        5209   -2.24    0.00  1.0000
   3   6   0    6464     397                                                        5920    2.26   -0.03  1.0000
   3   6   0    6357     353                                                        5818    2.26   -0.03  1.0000
   3   6   0    6537     437                                                        5990    2.26   -0.03  1.0000
   3   6   0    6470     344                                                        5926    2.26   -0.03  1.0000
  -4   6   0    2125     210                                                        1659    3.51    0.00  1.0000
   4   6   0    2130     197                                                        1660    3.54   -0.22  1.0000
  -4  -6   0    2066     126                                                        1603    3.54    0.22  1.0000
   4   6   0    1930     169                                                        1484    3.54   -0.22  1.0000
  -4   6   0    1992     176                                                        1542    3.51    0.00  1.0000
   4   6   0    1971     129                                                        1520    3.54   -0.22  1.0000
   4  -6   0    2134     128                                                        1667    3.51    0.00  1.0000
   4   6   0    1993     168                                                        1539    3.54   -0.22  1.0000
  -4   6   0    1988     171                                                        1539    3.51    0.00  1.0000
   4  -6   0    2006     134                                                        1554    3.51    0.00  1.0000
   5   6   0    7905     420                                                        5775    8.45    0.07  1.0000
  -5  -6   0    7565     320                                                        5487    8.45   -0.07  1.0000
   5  -6   0    7172     326                                                        5140   -8.50   -0.05  1.0000
   5   6   0    7460     385                                                        5396    8.45    0.07  1.0000
   5  -6   0    7416     339                                                        5347   -8.50   -0.05  1.0000
  -5   6   0    7203     365                                                        5167   -8.50    0.05  1.0000
  -5   6   0    7607     380                                                        5510   -8.50    0.05  1.0000
  -5  -6   0    7762     333                                                        5655    8.45   -0.07  1.0000
  -5   6   0    7575     441                                                        5483   -8.50    0.05  1.0000
   5   6   0    7348     371                                                        5301    8.45    0.07  1.0000
  -6   6   0    1781     191                                                        1508    2.20    0.22  1.0000
   6   6   0    1831     189                                                        1544    2.29   -0.17  1.0000
   6   6   0    1634     173                                                        1363    2.29   -0.17  1.0000
  -6   6   0    1725     176                                                        1457    2.20    0.22  1.0000
   6   6   0    1838     175                                                        1550    2.29   -0.17  1.0000
   7   6   0    1038     178                                                        1452   -3.85    0.02  1.0000
   7  -6   0     897     215                                                        1282    3.84    0.01  1.0000
   7   6   0    1049     176                                                        1465   -3.85    0.02  1.0000
  -7   6   0    1124     191                                                        1551    3.84   -0.01  1.0000
   7   6   0    1029     183                                                        1441   -3.85    0.02  1.0000
  -7   6   0     984     175                                                        1386    3.84   -0.01  1.0000
  -8   6   0     198     113                                                         140   -1.50    0.30  1.0000
   8   6   0     205     103                                                         147   -1.42   -0.08  1.0000
   8   6   0     301     106                                                         230   -1.42   -0.08  1.0000
   8  -6   0     308     145                                                         232   -1.50   -0.30  1.0000
  -8   6   0     380     117                                                         298   -1.50    0.30  1.0000
   8   6   0     176     104                                                         123   -1.42   -0.08  1.0000
  -9   6   0    3685     311                                                        3921    1.25    0.03  1.0000
   9   6   0    3210     305                                                        3420   -1.19   -0.23  1.0000
   9   6   0    3320     302                                                        3533   -1.19   -0.23  1.0000
  -9   6   0    2901     305                                                        3110    1.25    0.03  1.0000
   9  -6   0    2607     370                                                        2806    1.25   -0.03  1.0000
  10   6   0    3250     314                                                        3420    0.96    0.03  1.0000
 -10   6   0    3593     334                                                        3786    1.04   -0.06  1.0000
  10  -6   0    2893     396                                                        3067    1.04    0.06  1.0000
  10   6   0    3386     327                                                        3560    0.96    0.03  1.0000
 -10   6   0    3226     311                                                        3409    1.04   -0.06  1.0000
  11  -6   0       5     205                                                          19   -1.56   -0.09  1.0000
 -11   6   0       6     134                                                         -43   -1.56    0.09  1.0000
 -11   6   0      95     146                                                         143   -1.56    0.09  1.0000
  11   6   0      74     125                                                         117    1.59   -0.13  1.0000
  11   6   0     102     124                                                         152    1.59   -0.13  1.0000
  12   6   0    3163     351                                                        3480    1.80    0.07  1.0000
 -12   6   0    3508     375                                                        3835    1.76    0.17  1.0000
  12   6   0    3084     340                                                        3397    1.80    0.07  1.0000
 -12   6   0    3362     354                                                        3682    1.76    0.17  1.0000
  13   6   0     195     154                                                         288   -2.26   -0.15  1.0000
  13   6   0      15     134                                                          45   -2.26   -0.15  1.0000
 -13   6   0      12     144                                                          38    2.24    0.18  1.0000
  13  -6   0      12     181                                                         -42    2.24   -0.18  1.0000
 -13   6   0      44     172                                                          90    2.24    0.18  1.0000
  14   6   0     507     173                                                         459   -0.71    0.10  1.0000
  14   6   0     487     186                                                         440   -0.71    0.10  1.0000
 -14   6   0     603     193                                                         548   -0.75    0.05  1.0000
 -14   6   0     693     208                                                         634   -0.75    0.05  1.0000
  15   6   0      80     152                                                          62   -0.69   -0.11  1.0000
 -15   6   0     167     195                                                         139    0.75    0.00  1.0000
 -16   6   0     187     219                                                         261   -1.63    0.02  1.0000
  -1   7   0    1226     132                                                         974    2.50   -0.10  1.0000
   1   7   0    1399     123                                                        1134    2.44    0.04  1.0000
  -1   7   0    1285     132                                                        1026    2.50   -0.10  1.0000
  -1   7   0    1375     168                                                        1107    2.50   -0.10  1.0000
   1   7   0    1168     128                                                         927    2.44    0.04  1.0000
   1   7   0    1275     123                                                        1022    2.44    0.04  1.0000
  -1   7   0    1290     116                                                        1031    2.50   -0.10  1.0000
   1   7   0    1236     133                                                         987    2.44    0.04  1.0000
  -1   7   0    1355     113                                                        1089    2.50   -0.10  1.0000
   1   7   0    1057     164                                                         828    2.44    0.04  1.0000
   2   7   0      57      83                                                          15   -6.83    0.15  1.0000
   2   7   0      33      57                                                          85   -6.83    0.15  1.0000
  -2   7   0      29      44                                                          76    6.76    0.12  1.0000
  -2   7   0      32      77                                                         111    6.76    0.12  1.0000
  -2   7   0      30      88                                                          67    6.76    0.12  1.0000
   2   7   0      36      55                                                         109   -6.83    0.15  1.0000
   2   7   0      33      74                                                          77   -6.83    0.15  1.0000
   2   7   0      38      66                                                          43   -6.83    0.15  1.0000
  -2   7   0      49      85                                                         174    6.76    0.12  1.0000
  -2   7   0      32      50                                                         105    6.76    0.12  1.0000
   3   7   0     113      50                                                          37   -2.96    0.16  1.0000
   3   7   0     227      75                                                         111   -2.96    0.16  1.0000
   3   7   0     109      48                                                          35   -2.96    0.16  1.0000
   3   7   0     204     102                                                          95   -2.96    0.16  1.0000
   3   7   0     180      73                                                          79   -2.96    0.16  1.0000
  -3   7   0     115      76                                                          38   -2.97    0.18  1.0000
  -3   7   0      91      41                                                          25   -2.97    0.18  1.0000
  -3   7   0     161     100                                                          66   -2.97    0.18  1.0000
  -3   7   0     186      83                                                          83   -2.97    0.18  1.0000
  -3   7   0      21      50                                                          -7   -2.97    0.18  1.0000
  -4   7   0     114     119                                                         259   -3.66    0.16  1.0000
   4  -7   0     189      74                                                         371   -3.66   -0.16  1.0000
   4   7   0     218      72                                                         405    3.59   -0.11  1.0000
   4   7   0     114     120                                                         257    3.59   -0.11  1.0000
   4   7   0     308     122                                                         525    3.59   -0.11  1.0000
   4   7   0     242     111                                                         437    3.59   -0.11  1.0000
  -4   7   0     177     111                                                         351   -3.66    0.16  1.0000
  -4   7   0     159     107                                                         325   -3.66    0.16  1.0000
   5   7   0    5533     370                                                        5007   -2.37   -0.03  1.0000
  -5   7   0    5317     346                                                        4769   -2.52    0.16  1.0000
  -5   7   0    4653     396                                                        4141   -2.52    0.16  1.0000
   5   7   0    5385     353                                                        4866   -2.37   -0.03  1.0000
  -5   7   0    5804     364                                                        5231   -2.52    0.16  1.0000
   5   7   0    5418     396                                                        4898   -2.37   -0.03  1.0000
   6   7   0    5875     405                                                        5581   -1.26   -0.15  1.0000
  -6   7   0    5420     389                                                        5140    1.25    0.21  1.0000
   6   7   0    5690     387                                                        5401   -1.26   -0.15  1.0000
   6   7   0    5378     419                                                        5097   -1.26   -0.15  1.0000
  -6   7   0    5774     386                                                        5485    1.25    0.21  1.0000
  -7   7   0    2383     251                                                        2626    1.59   -0.09  1.0000
   7  -7   0    1820     278                                                        2034    1.59    0.09  1.0000
  -7   7   0    2350     242                                                        2592    1.59   -0.09  1.0000
   7   7   0    2487     249                                                        2725    1.53    0.01  1.0000
   7   7   0    2176     258                                                        2399    1.53    0.01  1.0000
   7   7   0    2143     244                                                        2365    1.53    0.01  1.0000
   8  -7   0    1314     230                                                         935    3.71    0.04  1.0000
   8   7   0    1172     166                                                         810   -3.78    0.05  1.0000
  -8   7   0     885     149                                                         580    3.71   -0.04  1.0000
  -8   7   0     756     142                                                         477    3.71   -0.04  1.0000
   8   7   0     971     153                                                         645   -3.78    0.05  1.0000
   9   7   0     245     127                                                         273   -0.57    0.10  1.0000
   9  -7   0     355     202                                                         390   -0.59    0.04  1.0000
  -9   7   0     365     147                                                         400   -0.59   -0.04  1.0000
  -9   7   0     381     151                                                         417   -0.59   -0.04  1.0000
   9   7   0     257     130                                                         286   -0.57    0.10  1.0000
  10  -7   0     667     266                                                         696   -0.36    0.07  1.0000
  10   7   0     755     176                                                         782    0.32    0.12  1.0000
 -10   7   0     655     177                                                         683   -0.36   -0.07  1.0000
 -10   7   0     643     177                                                         671   -0.36   -0.07  1.0000
  10   7   0     747     178                                                         774    0.32    0.12  1.0000
  11   7   0     307     174                                                         511   -3.33   -0.12  1.0000
  11  -7   0     344     239                                                         556   -3.29    0.09  1.0000
  11   7   0     440     180                                                         679   -3.33   -0.12  1.0000
 -11   7   0     364     193                                                         581   -3.29   -0.09  1.0000
 -11   7   0     611     207                                                         885   -3.29   -0.09  1.0000
 -12   7   0     197     169                                                         196   -0.05   -0.08  1.0000
  12   7   0       0     130                                                        -100    0.07    0.14  1.0000
  12  -7   0       0     179                                                         -24   -0.05    0.08  1.0000
 -12   7   0     189     148                                                         188   -0.05   -0.08  1.0000
  12   7   0     154     141                                                         153    0.07    0.14  1.0000
  13   7   0     239     154                                                         193    1.03   -0.13  1.0000
 -13   7   0     597     206                                                         520    1.06    0.08  1.0000
 -13   7   0     377     181                                                         317    1.06    0.08  1.0000
  13   7   0     132     142                                                          98    1.03   -0.13  1.0000
  14   7   0     389     193                                                         467   -1.24    0.04  1.0000
 -14   7   0     330     205                                                         403    1.27   -0.11  1.0000
  15   7   0     175     161                                                         126    1.30   -0.03  1.0000
 -15   7   0     347     206                                                         278    1.28    0.10  1.0000
   0   8   0    3223     242                                                        3151   -0.42   -0.02  1.0000
   0   8   0    3048     297                                                        2978   -0.42   -0.02  1.0000
   0   8   0    3290     238                                                        3217   -0.42   -0.02  1.0000
   0   8   0    3126     245                                                        3055   -0.42   -0.02  1.0000
   0   8   0    3116     247                                                        3045   -0.42   -0.02  1.0000
  -1   8   0    1337     165                                                        1389   -0.46    0.18  1.0000
   1   8   0    1370     162                                                        1430    0.52   -0.38  1.0000
   1   8   0    1345     199                                                        1405    0.52   -0.38  1.0000
  -1   8   0    1419     165                                                        1473   -0.46    0.18  1.0000
   1   8   0    1368     146                                                        1428    0.52   -0.38  1.0000
   1   8   0    1344     160                                                        1404    0.52   -0.38  1.0000
  -1   8   0    1395     146                                                        1449   -0.46    0.18  1.0000
  -1   8   0    1265     138                                                        1316   -0.46    0.18  1.0000
  -1   8   0    1646     209                                                        1704   -0.46    0.18  1.0000
   1   8   0    1446     154                                                        1508    0.52   -0.38  1.0000
   2   8   0    5974     357                                                        5699   -1.17   -0.19  1.0000
  -2   8   0    5790     354                                                        5522   -1.16   -0.23  1.0000
   2   8   0    5815     367                                                        5544   -1.17   -0.19  1.0000
  -2   8   0    5730     382                                                        5464   -1.16   -0.23  1.0000
   2   8   0    5713     395                                                        5444   -1.17   -0.19  1.0000
  -2   8   0    6300     399                                                        6021   -1.16   -0.23  1.0000
  -2   8   0    6344     461                                                        6064   -1.16   -0.23  1.0000
   2   8   0    6030     387                                                        5754   -1.17   -0.19  1.0000
  -2   8   0    5750     365                                                        5483   -1.16   -0.23  1.0000
  -3   8   0     223      77                                                         256   -0.72   -0.15  1.0000
  -3   8   0     352     113                                                         394   -0.72   -0.15  1.0000
   3   8   0     237     128                                                         273    0.73    0.02  1.0000
   3   8   0     208      73                                                         241    0.73    0.02  1.0000
  -3   8   0     329     113                                                         369   -0.72   -0.15  1.0000
  -3   8   0     281      70                                                         318   -0.72   -0.15  1.0000
  -3   8   0     258     122                                                         294   -0.72   -0.15  1.0000
   3   8   0     316     107                                                         357    0.73    0.02  1.0000
   3   8   0     234      73                                                         269    0.73    0.02  1.0000
   3   8   0     297     111                                                         337    0.73    0.02  1.0000
  -4   8   0     819     154                                                         859    0.44    0.12  1.0000
   4   8   0     763     144                                                         799    0.43   -0.04  1.0000
   4   8   0     934     186                                                         974    0.43   -0.04  1.0000
   4   8   0     716     147                                                         751    0.43   -0.04  1.0000
  -4   8   0     600     168                                                         634    0.44    0.12  1.0000
  -4   8   0     776     149                                                         815    0.44    0.12  1.0000
  -5   8   0     816     158                                                         858    0.49   -0.26  1.0000
   5   8   0     720     172                                                         756   -0.44    0.16  1.0000
  -5   8   0     649     173                                                         686    0.49   -0.26  1.0000
  -5   8   0     885     165                                                         928    0.49   -0.26  1.0000
   5   8   0     808     155                                                         846   -0.44    0.16  1.0000
   5   8   0     830     159                                                         868   -0.44    0.16  1.0000
   6   8   0     447     144                                                         622   -2.50    0.18  1.0000
  -6   8   0     370     147                                                         533   -2.55    0.28  1.0000
  -6   8   0     173     137                                                         289   -2.55    0.28  1.0000
  -6   8   0     443     152                                                         620   -2.55    0.28  1.0000
   6   8   0     367     148                                                         526   -2.50    0.18  1.0000
   6   8   0     273     128                                                         413   -2.50    0.18  1.0000
   7  -8   0    3997     420                                                        3807   -0.99   -0.12  1.0000
  -7   8   0    5105     371                                                        4891   -0.99    0.12  1.0000
  -7   8   0    5228     385                                                        5011   -0.99    0.12  1.0000
   7   8   0    5410     383                                                        5196    0.96   -0.10  1.0000
   7   8   0    5100     389                                                        4892    0.96   -0.10  1.0000
   8  -8   0    1325     258                                                        1179    1.36   -0.02  1.0000
   8   8   0    1319     199                                                        1171    1.38   -0.02  1.0000
  -8   8   0    1418     204                                                        1266    1.36    0.02  1.0000
   8   8   0    1369     207                                                        1218    1.38   -0.02  1.0000
  -8   8   0    1463     211                                                        1309    1.36    0.02  1.0000
   9   8   0     890     159                                                         531    4.45   -0.27  1.0000
  -9   8   0    1044     173                                                         653   -4.42    0.17  1.0000
   9  -8   0     771     192                                                         441   -4.42   -0.17  1.0000
  -9   8   0     840     153                                                         494   -4.42    0.17  1.0000
   9   8   0     862     154                                                         509    4.45   -0.27  1.0000
  10   8   0    1003     219                                                        1148   -1.45    0.00  1.0000
  10   8   0     858     202                                                         992   -1.45    0.00  1.0000
  10  -8   0     954     274                                                        1095   -1.45    0.03  1.0000
 -10   8   0    1052     222                                                        1200   -1.45   -0.03  1.0000
 -10   8   0    1127     227                                                        1280   -1.45   -0.03  1.0000
  11   8   0     148     145                                                         163    0.40    0.02  1.0000
 -11   8   0     231     150                                                         250   -0.40    0.21  1.0000
  11  -8   0      20     199                                                          26   -0.40   -0.21  1.0000
  11   8   0      72     131                                                          83    0.40    0.02  1.0000
 -11   8   0     127     145                                                         141   -0.40    0.21  1.0000
  12   8   0       4     139                                                          11   -1.00    0.13  1.0000
 -12   8   0     192     165                                                         234   -0.99    0.25  1.0000
  12   8   0     190     154                                                         233   -1.00    0.13  1.0000
  12  -8   0     148     244                                                         188   -0.99   -0.25  1.0000
 -12   8   0     140     144                                                         176   -0.99    0.25  1.0000
  13   8   0     724     194                                                         591   -1.70    0.01  1.0000
 -13   8   0     764     227                                                         627    1.70   -0.01  1.0000
  14   8   0     103     162                                                          85    0.61   -0.04  1.0000
 -14   8   0     239     189                                                         213    0.57   -0.06  1.0000
   1   9   0     658     146                                                        1068   -4.62   -0.06  1.0000
  -1   9   0     712     136                                                        1133   -4.59   -0.03  1.0000
   1   9   0     765     157                                                        1203   -4.62   -0.06  1.0000
  -1   9   0     637     194                                                        1039   -4.59   -0.03  1.0000
  -1   9   0     692     162                                                        1108   -4.59   -0.03  1.0000
   1   9   0     662     205                                                        1074   -4.62   -0.06  1.0000
  -1   9   0     666     132                                                        1075   -4.59   -0.03  1.0000
   1   9   0     711     140                                                        1136   -4.62   -0.06  1.0000
  -1   9   0     645     165                                                        1049   -4.59   -0.03  1.0000
   1   9   0     633     150                                                        1037   -4.62   -0.06  1.0000
   2   9   0     922     161                                                        1064    1.48    0.10  1.0000
   2   9   0    1014     163                                                        1163    1.48    0.10  1.0000
  -2   9   0     962     169                                                        1113   -1.53    0.17  1.0000
  -2   9   0    1008     131                                                        1162   -1.53    0.17  1.0000
   2   9   0     986     142                                                        1133    1.48    0.10  1.0000
   2   9   0     585     174                                                         699    1.48    0.10  1.0000
  -2   9   0    1162     184                                                        1327   -1.53    0.17  1.0000
  -2   9   0    1158     208                                                        1323   -1.53    0.17  1.0000
   2   9   0     970     139                                                        1116    1.48    0.10  1.0000
  -2   9   0    1040     126                                                        1196   -1.53    0.17  1.0000
  -3   9   0    5540     416                                                        4754    3.59   -0.17  1.0000
   3   9   0    5703     421                                                        4912    3.56   -0.27  1.0000
   3   9   0    5212     361                                                        4457    3.56   -0.27  1.0000
  -3   9   0    5257     347                                                        4492    3.59   -0.17  1.0000
  -3   9   0    5523     365                                                        4738    3.59   -0.17  1.0000
   3   9   0    5334     349                                                        4570    3.56   -0.27  1.0000
  -4   9   0     955     194                                                         903   -0.56    0.12  1.0000
   4   9   0     784     151                                                         738    0.56   -0.12  1.0000
  -4   9   0     856     161                                                         807   -0.56    0.12  1.0000
   4   9   0     850     186                                                         802    0.56   -0.12  1.0000
  -4   9   0     698     156                                                         654   -0.56    0.12  1.0000
   4   9   0     748     152                                                         703    0.56   -0.12  1.0000
  -5   9   0    1587     208                                                        1676   -0.72    0.12  1.0000
  -5   9   0    1627     215                                                        1717   -0.72    0.12  1.0000
   5   9   0    1530     212                                                        1620   -0.74    0.16  1.0000
   5   9   0    1619     213                                                        1712   -0.74    0.16  1.0000
  -5   9   0    1343     227                                                        1425   -0.72    0.12  1.0000
  -6   9   0     229     120                                                         199    0.66   -0.14  1.0000
   6   9   0     281     122                                                         244   -0.74    0.18  1.0000
  -6   9   0     225     116                                                         196    0.66   -0.14  1.0000
  -6   9   0     102     129                                                          83    0.66   -0.14  1.0000
   6   9   0     355     128                                                         313   -0.74    0.18  1.0000
  -7   9   0      40     112                                                           5   -2.72    0.23  1.0000
  -7   9   0     374     124                                                         234   -2.72    0.23  1.0000
   7   9   0     357     125                                                         218   -2.77    0.27  1.0000
   7  -9   0     182     123                                                          87   -2.72   -0.23  1.0000
   7   9   0     173     117                                                          81   -2.77    0.27  1.0000
  -8   9   0    1965     238                                                        1852    0.84   -0.02  1.0000
   8   9   0    1990     243                                                        1877   -0.84    0.05  1.0000
  -8   9   0    1874     237                                                        1764    0.84   -0.02  1.0000
   8   9   0    1721     233                                                        1616   -0.84    0.05  1.0000
   8  -9   0    1584     262                                                        1483    0.84    0.02  1.0000
   9   9   0     641     185                                                         720    1.00    0.03  1.0000
   9   9   0     602     182                                                         679    1.00    0.03  1.0000
  -9   9   0     650     177                                                         725    0.94    0.02  1.0000
   9  -9   0     650     235                                                         725    0.94   -0.02  1.0000
  -9   9   0     673     177                                                         750    0.94    0.02  1.0000
  10  -9   0      97     169                                                         221   -3.27   -0.10  1.0000
 -10   9   0     158     145                                                         309   -3.27    0.10  1.0000
  10   9   0     112     144                                                         243    3.27   -0.04  1.0000
 -10   9   0     141     144                                                         285   -3.27    0.10  1.0000
  10   9   0      89     127                                                         208    3.27   -0.04  1.0000
  11   9   0     728     195                                                         838    1.29    0.02  1.0000
 -11   9   0     781     206                                                         893    1.26    0.10  1.0000
 -11   9   0     695     198                                                         800    1.26    0.10  1.0000
  11   9   0     712     190                                                         821    1.29    0.02  1.0000
  11  -9   0     512     270                                                         602    1.26   -0.10  1.0000
 -12   9   0     370     175                                                         335   -0.62   -0.05  1.0000
  12   9   0      76     147                                                          61    0.60    0.00  1.0000
  13   9   0     294     187                                                         216   -1.61   -0.03  1.0000
 -13   9   0     617     199                                                         502   -1.59   -0.15  1.0000
   0  10   0    3333     247                                                        2763   -3.38   -0.11  1.0000
   0  10   0    3604     262                                                        3010   -3.38   -0.11  1.0000
   0  10   0    3396     239                                                        2820   -3.38   -0.11  1.0000
   0  10   0    3549     252                                                        2960   -3.38   -0.11  1.0000
   0  10   0    3636     317                                                        3039   -3.38   -0.11  1.0000
  -1  10   0      13     110                                                         -16    2.36   -0.07  1.0000
   1  10   0     112      74                                                          49   -2.34   -0.03  1.0000
  -1  10   0     101      63                                                          42    2.36   -0.07  1.0000
  -1  10   0      92      62                                                          36    2.36   -0.07  1.0000
   1  10   0      13      67                                                          -9   -2.34   -0.03  1.0000
   1  10   0      43      75                                                           9   -2.34   -0.03  1.0000
   1  10   0      13      97                                                         -95   -2.34   -0.03  1.0000
  -1  10   0      50      90                                                          12    2.36   -0.07  1.0000
   1  10   0     208      86                                                         118   -2.34   -0.03  1.0000
  -1  10   0      61      88                                                          18    2.36   -0.07  1.0000
   2  10   0    2331     247                                                        2343    0.08    0.01  1.0000
   2  10   0    2583     249                                                        2596    0.08    0.01  1.0000
  -2  10   0    2357     239                                                        2362    0.04   -0.01  1.0000
  -2  10   0    2901     263                                                        2907    0.04   -0.01  1.0000
  -2  10   0    2866     312                                                        2872    0.04   -0.01  1.0000
  -3  10   0    2016     262                                                        1900    0.86   -0.08  1.0000
  -3  10   0    1805     211                                                        1695    0.86   -0.08  1.0000
  -3  10   0    1773     223                                                        1664    0.86   -0.08  1.0000
   3  10   0    1907     247                                                        1795   -0.86    0.15  1.0000
   3  10   0    1860     209                                                        1749   -0.86    0.15  1.0000
   3  10   0    1822     205                                                        1713   -0.86    0.15  1.0000
  -4  10   0     515     142                                                         462   -0.77   -0.15  1.0000
   4  10   0     516     146                                                         463   -0.78   -0.10  1.0000
  -4  10   0     664     147                                                         604   -0.77   -0.15  1.0000
   4  10   0     622     139                                                         564   -0.78   -0.10  1.0000
  -4  10   0     443     163                                                         394   -0.77   -0.15  1.0000
   5  10   0    3187     325                                                        3591    2.28   -0.08  1.0000
  -5  10   0    2954     314                                                        3343   -2.27    0.05  1.0000
  -5  10   0    2931     354                                                        3319   -2.27    0.05  1.0000
  -5  10   0    3029     304                                                        3423   -2.27    0.05  1.0000
   5  10   0    3108     313                                                        3507    2.28   -0.08  1.0000
   6  10   0      33      99                                                          81   -2.17   -0.08  1.0000
   6  10   0      34     108                                                          84   -2.17   -0.08  1.0000
  -6  10   0      85     127                                                         156   -2.16    0.25  1.0000
  -6  10   0      44     115                                                          98   -2.16    0.25  1.0000
  -6  10   0      35     116                                                          85   -2.16    0.25  1.0000
  -7  10   0     199     134                                                         290   -1.92   -0.08  1.0000
   7 -10   0     123     145                                                         196   -1.92    0.08  1.0000
   7  10   0      94     126                                                         161    1.97    0.03  1.0000
   7  10   0      58     127                                                         113    1.97    0.03  1.0000
  -7  10   0      98     131                                                         164   -1.92   -0.08  1.0000
   8  10   0     134     116                                                          88    1.49   -0.18  1.0000
  -8  10   0     139     130                                                          92    1.44    0.00  1.0000
   8 -10   0     134     155                                                          88    1.44    0.00  1.0000
   8  10   0     177     132                                                         123    1.49   -0.18  1.0000
  -8  10   0     272     136                                                         205    1.44    0.00  1.0000
  -9  10   0     715     195                                                         928    2.44    0.02  1.0000
   9  10   0     675     204                                                         878   -2.39   -0.03  1.0000
  -9  10   0     581     198                                                         774    2.44    0.02  1.0000
   9 -10   0     430     215                                                         598    2.44   -0.02  1.0000
   9  10   0     559     189                                                         745   -2.39   -0.03  1.0000
  10  10   0     390     176                                                         371    0.31   -0.01  1.0000
 -10  10   0     660     200                                                         633    0.36   -0.15  1.0000
  10  10   0     561     182                                                         539    0.31   -0.01  1.0000
  10 -10   0     367     196                                                         345    0.36    0.15  1.0000
 -10  10   0     784     196                                                         754    0.36   -0.15  1.0000
 -11  10   0     721     190                                                         635   -1.08   -0.01  1.0000
  11  10   0     616     190                                                         534    1.12    0.09  1.0000
 -12  10   0     401     181                                                         416   -0.25    0.02  1.0000
  12  10   0     339     171                                                         351   -0.21   -0.08  1.0000
 -13  10   0     591     215                                                         545   -0.63    0.07  1.0000
   1  11   0       7      72                                                         -22    1.78    0.08  1.0000
   1  11   0      23     112                                                          56    1.78    0.08  1.0000
   1  11   0       0      69                                                           7    1.78    0.08  1.0000
  -1  11   0       8      90                                                         -16    1.79    0.00  1.0000
  -1  11   0      13     123                                                          40    1.79    0.00  1.0000
  -1  11   0      48      93                                                          94    1.79    0.00  1.0000
   2  11   0     146     117                                                          86    1.83    0.14  1.0000
   2  11   0     431     120                                                         322    1.83    0.14  1.0000
  -2  11   0     436     126                                                         328   -1.81    0.04  1.0000
  -2  11   0     478     159                                                         365   -1.81    0.04  1.0000
  -2  11   0     493     135                                                         378   -1.81    0.04  1.0000
   2  11   0     492     125                                                         375    1.83    0.14  1.0000
  -3  11   0     342     161                                                         340    0.03   -0.15  1.0000
  -3  11   0     238     119                                                         237    0.03   -0.15  1.0000
  -3  11   0     321     131                                                         319    0.03   -0.15  1.0000
   3  11   0     285     119                                                         284    0.03    0.13  1.0000
   3  11   0     261     118                                                         260    0.03    0.13  1.0000
  -4  11   0     804     224                                                         915    1.24    0.02  1.0000
   4  11   0     797     184                                                         898   -1.14   -0.05  1.0000
  -4  11   0     802     182                                                         912    1.24    0.02  1.0000
   4  11   0     800     192                                                         901   -1.14   -0.05  1.0000
  -4  11   0     876     194                                                         991    1.24    0.02  1.0000
   5  11   0     677     170                                                         630    0.60    0.02  1.0000
  -5  11   0     621     194                                                         578    0.57    0.01  1.0000
  -5  11   0     666     160                                                         622    0.57    0.01  1.0000
   5  11   0     599     158                                                         555    0.60    0.02  1.0000
  -5  11   0     559     150                                                         519    0.57    0.01  1.0000
  -6  11   0    1131     228                                                        1017   -1.13   -0.08  1.0000
   6  11   0    1194     204                                                        1077    1.14   -0.02  1.0000
  -6  11   0    1134     198                                                        1020   -1.13   -0.08  1.0000
   6  11   0    1182     208                                                        1066    1.14   -0.02  1.0000
  -6  11   0    1368     207                                                        1242   -1.13   -0.08  1.0000
  -7  11   0      18     114                                                         -23    2.76    0.17  1.0000
   7 -11   0      83     130                                                          32    2.76   -0.17  1.0000
   7  11   0      77     116                                                          63    3.02   -0.59  1.0000
   7  11   0      22     111                                                         -30    3.02   -0.59  1.0000
  -7  11   0     234     127                                                         124    2.76    0.17  1.0000
  -8  11   0     864     198                                                         743   -1.40    0.08  1.0000
  -8  11   0     953     194                                                         826   -1.40    0.08  1.0000
   8  11   0     808     193                                                         691    1.40   -0.01  1.0000
   8 -11   0    1002     246                                                         871   -1.40   -0.08  1.0000
   8  11   0     922     193                                                         797    1.40   -0.01  1.0000
  -9  11   0     430     198                                                         592    2.35    0.12  1.0000
   9  11   0     683     212                                                         886    2.38    0.11  1.0000
 -10  11   0       1     158                                                           1   -0.08   -0.09  1.0000
  10  11   0     151     159                                                         153    0.06    0.01  1.0000
  11  11   0    1242     254                                                        1063   -1.73   -0.04  1.0000
 -11  11   0     970     221                                                         809   -1.76   -0.07  1.0000
   0  12   0    1900     289                                                        2110   -1.52   -0.20  1.0000
  -1  12   0      86     120                                                         270   -4.68    0.11  1.0000
   1  12   0     109     116                                                         309    4.66    0.07  1.0000
  -1  12   0     177     129                                                         418   -4.68    0.11  1.0000
   1  12   0     137     115                                                         355    4.66    0.07  1.0000
  -1  12   0     142     164                                                         364   -4.68    0.11  1.0000
  -2  12   0      78     109                                                          58    0.83   -0.06  1.0000
   2  12   0      94      92                                                          71    0.86   -0.10  1.0000
   2  12   0     110      92                                                          85    0.86   -0.10  1.0000
  -2  12   0     143     145                                                         115    0.83   -0.06  1.0000
  -2  12   0      63     105                                                          45    0.83   -0.06  1.0000
   3  12   0      94      98                                                          92   -0.01   -0.20  1.0000
  -3  12   0      17      97                                                          16    0.08    0.10  1.0000
   3  12   0      18      97                                                          17   -0.01   -0.20  1.0000
  -3  12   0       5     102                                                           4    0.08    0.10  1.0000
  -3  12   0     188     146                                                         184    0.08    0.10  1.0000
  -4  12   0     134     121                                                         103    0.93    0.04  1.0000
   4  12   0      98      98                                                          72    0.92    0.04  1.0000
  -4  12   0      27     117                                                          14    0.93    0.04  1.0000
   4  12   0      82     102                                                          58    0.92    0.04  1.0000
  -4  12   0      76     108                                                          53    0.93    0.04  1.0000
  -5  12   0     246     115                                                          95    3.92    0.03  1.0000
  -5  12   0     268     145                                                         109    3.92    0.03  1.0000
   5  12   0     306     114                                                         133   -3.94   -0.02  1.0000
  -5  12   0     289     115                                                         123    3.92    0.03  1.0000
   5  12   0     145     103                                                          37   -3.94   -0.02  1.0000
   6  12   0     104     135                                                         205   -2.70   -0.22  1.0000
  -6  12   0      87     122                                                         182   -2.72   -0.05  1.0000
  -6  12   0     146     144                                                         263   -2.72   -0.05  1.0000
   6  12   0     155     144                                                         274   -2.70   -0.22  1.0000
  -7  12   0    2653     318                                                        2737   -0.53   -0.02  1.0000
   7  12   0    2729     317                                                        2816    0.54    0.02  1.0000
   7 -12   0    3076     374                                                        3166   -0.53    0.02  1.0000
  -8  12   0     130     141                                                         146    0.46   -0.02  1.0000
   8  12   0     152     134                                                         170    0.50   -0.16  1.0000
   9  12   0     314     170                                                         369    0.97    0.04  1.0000
  -9  12   0     293     176                                                         344   -0.92   -0.16  1.0000
  10  12   0     667     223                                                         788    1.47    0.15  1.0000
 -10  12   0     713     230                                                         840    1.49    0.13  1.0000
   2  13   0      11      93                                                          32    1.51   -0.14  1.0000
   2  13   0      99     102                                                         150    1.51   -0.14  1.0000
  -2  13   0     157     152                                                         223   -1.56    0.17  1.0000
  -2  13   0     108     121                                                         164   -1.56    0.17  1.0000
  -2  13   0     145     116                                                         208   -1.56    0.17  1.0000
   3  13   0     435     161                                                         578    2.08    0.09  1.0000
   3  13   0     282     131                                                         399    2.08    0.09  1.0000
  -3  13   0     480     209                                                         629    2.07    0.18  1.0000
  -3  13   0     519     180                                                         674    2.07    0.18  1.0000
  -3  13   0     554     181                                                         714    2.07    0.18  1.0000
  -4  13   0    1067     273                                                        1309    2.30    0.02  1.0000
  -4  13   0    1020     232                                                        1257    2.30    0.02  1.0000
  -4  13   0     986     240                                                        1219    2.30    0.02  1.0000
   4  13   0    1032     232                                                        1280   -2.39   -0.07  1.0000
   4  13   0     904     209                                                        1137   -2.39   -0.07  1.0000
  -5  13   0     447     156                                                         353   -1.54    0.06  1.0000
   5  13   0     388     153                                                         302   -1.51    0.06  1.0000
  -5  13   0     464     191                                                         368   -1.54    0.06  1.0000
   5  13   0     447     149                                                         355   -1.51    0.06  1.0000
   6  13   0     271     144                                                         195    1.64   -0.05  1.0000
  -6  13   0     217     142                                                         149   -1.65   -0.04  1.0000
   7  13   0       4     131                                                          21   -1.85   -0.20  1.0000
  -7  13   0      30     138                                                          66   -1.85    0.01  1.0000
  -8  13   0     164     157                                                         181   -0.41    0.13  1.0000
   8  13   0      91     145                                                         102    0.37    0.11  1.0000
   3  14   0     195     125                                                         115   -2.13    0.04  1.0000
  -3  14   0      10     108                                                         -55    2.11    0.02  1.0000
  -4  14   0      75     132                                                         118   -1.46   -0.02  1.0000
   4  14   0      18     117                                                          41   -1.44    0.13  1.0000
  -5  14   0     186     170                                                         296    2.35    0.04  1.0000
   5  14   0     298     162                                                         434   -2.33   -0.04  1.0000
  -6  14   0       1     140                                                         -26    0.73    0.06  1.0000
   6  14   0       1     134                                                          -6    0.76    0.03  1.0000
   1   0  -1  189653    4972                                                       83854  -95.40    0.17  1.0000
  -1   0   1  184806    4334                                                       80638  -95.40   -0.17  1.0000
   1   0  -1  189474    4572                                                       83735  -95.40    0.17  1.0000
   3   0   1   58464    2219                                                       39783   27.68   -0.12  1.0000
   3   0   1   59753    2134                                                       40848   27.68   -0.12  1.0000
   3   0  -1   25094    2210                                                       40046   27.27   -0.16  1.0000
   3   0  -1   27277    2414                                                       42792   27.27   -0.16  1.0000
  -3   0  -1   56522    2172                                                       38184   27.68    0.12  1.0000
  -3   0   1   24055    2095                                                       38734   27.27    0.16  1.0000
  -3   0  -1   57082    2103                                                       38644   27.68    0.12  1.0000
  11   0   1     163     112                                                         167    0.76   -0.70  1.0000
 -11   0   1     689     132                                                         467   -3.01    0.37  1.0000
  11   0  -1     532     120                                                         345   -3.01   -0.37  1.0000
  11   0  -1     449     111                                                         279   -3.01   -0.37  1.0000
  11   0  -1     651     152                                                         442   -3.01   -0.37  1.0000
 -11   0   1     634     137                                                         422   -3.01    0.37  1.0000
  11   0   1      60     113                                                          62    0.76   -0.70  1.0000
 -11   0  -1     156     133                                                         132    0.76    0.70  1.0000
 -11   0  -1     149     127                                                         126    0.76    0.70  1.0000
  11   0   1     139     116                                                         143    0.76   -0.70  1.0000
  13   0   1    1545     191                                                         834   -6.82    0.16  1.0000
  13   0  -1     405     190                                                         755   -4.87    0.04  1.0000
  15   0  -1     691     202                                                         732   -0.50   -0.07  1.0000
   0   1   1    6320    1561                                                       26511  -54.48   -0.41  1.0000
   0   1   1    8892    1790                                                       31548  -54.48   -0.41  1.0000
   0   1  -1    8791    1799                                                       31237  -54.25   -0.51  1.0000
   1   1  -1    2099     305                                                        4988  -16.22   -0.33  1.0000
   1   1  -1    2599     334                                                        5744  -16.22   -0.33  1.0000
  -1   1   1    2056     295                                                        4985   16.51    0.22  1.0000
   1   1  -1    2160     280                                                        5082  -16.22   -0.33  1.0000
  -1   1   1    1971     289                                                        4852   16.51    0.22  1.0000
   1  -1  -1    2718     336                                                        5991   16.51   -0.22  1.0000
  -1  -1   1    2357     280                                                        5383  -16.22    0.33  1.0000
   1  -1  -1    2215     295                                                        5231   16.51   -0.22  1.0000
  -5   1   1    3123     140                                                        1784   -8.94    0.21  1.0000
   5   1  -1    2837     135                                                        1570    8.93   -0.09  1.0000
   5   1  -1    3449     157                                                        2033    8.93   -0.09  1.0000
   5   1  -1    3105     135                                                        1771    8.93   -0.09  1.0000
  -5   1   1    2952     134                                                        1655   -8.94    0.21  1.0000
  -5  -1   1    3046     127                                                        1725    8.93    0.09  1.0000
   5  -1  -1    3023     126                                                        1706   -8.94   -0.21  1.0000
   5  -1  -1    2876     120                                                        1596   -8.94   -0.21  1.0000
  -5  -1   1    2739     120                                                        1496    8.93    0.09  1.0000
   5  -1  -1    3258     170                                                        1884   -8.94   -0.21  1.0000
  -6   1   1    3968     392                                                        6274  -10.60   -0.07  1.0000
   6   1  -1    4117     384                                                        6453  -10.57    0.24  1.0000
   6   1  -1    4282     400                                                        6659  -10.57    0.24  1.0000
  -6   1   1    3777     379                                                        6034  -10.60   -0.07  1.0000
   6   1  -1    4784     443                                                        7282  -10.57    0.24  1.0000
   6  -1  -1    3523     440                                                        5711  -10.60    0.07  1.0000
  -6  -1   1    3627     376                                                        5836  -10.57   -0.24  1.0000
   6  -1  -1    3805     370                                                        6069  -10.60    0.07  1.0000
  -6  -1   1    4151     369                                                        6497  -10.57   -0.24  1.0000
   6  -1  -1    4227     387                                                        6599  -10.60    0.07  1.0000
   7   1   1    2540     191                                                        2168   -2.51    0.06  1.0000
   9   1  -1     167     114                                                         365   -4.13   -0.01  1.0000
  -9   1   1     129     110                                                         312    4.20    0.14  1.0000
  -9   1   1     150     110                                                         344    4.20    0.14  1.0000
   9   1  -1     155     102                                                         348   -4.13   -0.01  1.0000
   9   1  -1     120      91                                                         294   -4.13   -0.01  1.0000
  -9  -1   1     143     101                                                         329   -4.13    0.01  1.0000
   9  -1  -1     139      89                                                         326    4.20   -0.14  1.0000
   9  -1  -1     140      96                                                         328    4.20   -0.14  1.0000
  -9  -1   1     139      97                                                         323   -4.13    0.01  1.0000
   9   1   1     983     131                                                         667   -3.63    0.14  1.0000
   9  -1  -1     161     119                                                         360    4.20   -0.14  1.0000
 -10  -1  -1    1511     231                                                        2529    7.46    0.20  1.0000
  10  -1   1    1280     243                                                        2236    7.53    0.04  1.0000
 -10  -1  -1    1237     229                                                        2170    7.46    0.20  1.0000
  10  -1   1    1260     218                                                        2210    7.53    0.04  1.0000
  10  -1   1    1253     225                                                        2200    7.53    0.04  1.0000
 -10   1   1    2047     227                                                        2344    2.08   -0.20  1.0000
  10   1  -1    2046     237                                                        2340    2.05    0.15  1.0000
 -10   1   1    1845     221                                                        2127    2.08   -0.20  1.0000
  10   1  -1    1882     214                                                        2164    2.05    0.15  1.0000
  10   1  -1    2010     218                                                        2302    2.05    0.15  1.0000
 -10  -1   1    1929     210                                                        2213    2.05   -0.15  1.0000
  10   1   1    1384     236                                                        2362    7.46   -0.20  1.0000
  10  -1  -1    2203     259                                                        2513    2.08    0.20  1.0000
  10  -1  -1    1762     202                                                        2040    2.08    0.20  1.0000
  10   1   1    1193     232                                                        2111    7.46   -0.20  1.0000
 -10   1  -1    1289     243                                                        2248    7.53   -0.04  1.0000
  10  -1  -1    2213     211                                                        2523    2.08    0.20  1.0000
  10   1   1    1352     234                                                        2320    7.46   -0.20  1.0000
 -10   1  -1    1118     229                                                        2020    7.53   -0.04  1.0000
  11  -1   1    5824     386                                                        5527    1.29   -0.08  1.0000
  11  -1   1    4725     404                                                        4458    1.29   -0.08  1.0000
  11  -1   1    4992     366                                                        4717    1.29   -0.08  1.0000
  11   1   1    4596     384                                                        4324   -1.33   -0.14  1.0000
 -11   1  -1    5201     378                                                        4919    1.29    0.08  1.0000
  11   1   1    4927     373                                                        4645   -1.33   -0.14  1.0000
  11   1   1    4985     382                                                        4701   -1.33   -0.14  1.0000
 -11   1  -1    5408     397                                                        5120    1.29    0.08  1.0000
  12  -1   1     155     167                                                         435   -5.48   -0.30  1.0000
  12   1   1     257     152                                                         598   -5.51   -0.08  1.0000
 -12   1  -1     282     176                                                         634   -5.48    0.30  1.0000
  12   1   1     260     158                                                         603   -5.51   -0.08  1.0000
  12   1   1     293     175                                                         653   -5.51   -0.08  1.0000
 -12   1  -1     279     172                                                         629   -5.48    0.30  1.0000
  13  -1   1    1148     243                                                        1570   -3.75   -0.09  1.0000
  13   1   1    1081     234                                                        1494    3.78   -0.09  1.0000
  13   1   1     924     220                                                        1308    3.78   -0.09  1.0000
  13   1   1    1135     217                                                        1558    3.78   -0.09  1.0000
  14   1  -1     100     124                                                         104    0.19    0.30  1.0000
  14  -1   1     314     165                                                         336   -0.41    0.16  1.0000
  14  -1  -1     133     153                                                         136    0.15    0.23  1.0000
  15  -1   1     215     165                                                         309    1.93   -0.07  1.0000
  15   1  -1     711     165                                                         518   -2.56   -0.02  1.0000
  15  -1  -1     567     184                                                         399    2.51    0.04  1.0000
  16  -1  -1     284     171                                                         321    0.70   -0.04  1.0000
   0   2  -1   40918    1762                                                       32229   14.87    0.44  1.0000
   0   2  -1   34987    1604                                                       26991   14.87    0.44  1.0000
   0   2   1   37023    1748                                                       28904  -14.64   -0.59  1.0000
   0   2   1   35255    1522                                                       27344  -14.64   -0.59  1.0000
   8   2  -1    8728     665                                                       10417    5.65    0.05  1.0000
  -8  -2  -1   11503     578                                                        9764    5.52    0.21  1.0000
   8  -2   1   11185     606                                                        9477   -5.49   -0.22  1.0000
  -8   2   1    8898     611                                                       10578   -5.57    0.13  1.0000
   8   2  -1    8861     620                                                       10562    5.65    0.05  1.0000
   8   2  -1    8716     596                                                       10403    5.65    0.05  1.0000
   8  -2   1   10105     576                                                        8485   -5.49   -0.22  1.0000
   8  -2   1   11752     706                                                       10000   -5.49   -0.22  1.0000
  -8  -2  -1   10365     588                                                        8718    5.52    0.21  1.0000
  -8   2   1    9064     594                                                       10759   -5.57    0.13  1.0000
   8  -2  -1    9133     574                                                       10836   -5.57   -0.13  1.0000
  -8  -2   1    8734     583                                                       10422    5.65   -0.05  1.0000
   8   2   1   10700     621                                                        9027    5.52   -0.21  1.0000
   8  -2  -1    9850     601                                                       11616   -5.57   -0.13  1.0000
  -8  -2   1    9329     569                                                       11071    5.65   -0.05  1.0000
   8   2   1   10956     602                                                        9262    5.52   -0.21  1.0000
  -8   2  -1   11260     598                                                        9548   -5.49    0.22  1.0000
  -8   2  -1   10379     609                                                        8738   -5.49    0.22  1.0000
   8  -2  -1    7315     684                                                        8847   -5.57   -0.13  1.0000
   8   2   1   10866     656                                                        9179    5.52   -0.21  1.0000
   9   2  -1       5     105                                                         284    9.66    0.09  1.0000
   9  -2   1     808     107                                                          88   12.46   -0.12  1.0000
  -9  -2  -1     932      91                                                         134   12.40    0.07  1.0000
   9   2  -1      33     117                                                         420    9.66    0.09  1.0000
   9   2  -1       4     100                                                         281    9.66    0.09  1.0000
  -9   2   1      10     114                                                         322    9.73    0.10  1.0000
  -9  -2  -1    1007     100                                                         163   12.40    0.07  1.0000
   9  -2   1    1099      91                                                         199   12.46   -0.12  1.0000
   9  -2   1     363      77                                                          -2   12.46   -0.12  1.0000
  -9   2   1       7     113                                                         306    9.73    0.10  1.0000
  -9   2  -1    1023     115                                                         167   12.46    0.12  1.0000
  -9   2  -1    1131     113                                                         212   12.46    0.12  1.0000
   9  -2  -1      35     140                                                         429    9.73   -0.10  1.0000
   9  -2  -1       3      85                                                         264    9.73   -0.10  1.0000
  -9  -2   1      13      93                                                         334    9.66   -0.09  1.0000
   9   2   1    1003      97                                                         162   12.40   -0.07  1.0000
   9  -2  -1       1      81                                                         208    9.73   -0.10  1.0000
   9   2   1    1313     101                                                         299   12.40   -0.07  1.0000
   9   2   1     948     102                                                         140   12.40   -0.07  1.0000
 -10   2   1    1662     208                                                        1532    1.06    0.15  1.0000
  10   2  -1    2107     201                                                        1963   -1.05    0.20  1.0000
 -10   2   1    1768     202                                                        1634    1.06    0.15  1.0000
  10   2  -1    1826     206                                                        1692   -1.05    0.20  1.0000
  10   2  -1    2001     204                                                        1860   -1.05    0.20  1.0000
  10  -2  -1    1685     217                                                        1555    1.06   -0.15  1.0000
  11   2  -1      31     118                                                         117   -3.37   -0.70  1.0000
  11  -2   1     287     143                                                         218   -1.82   -0.18  1.0000
 -11   2   1      23     125                                                          92   -3.17    0.07  1.0000
  11   2  -1      55     122                                                         161   -3.37   -0.70  1.0000
 -11   2   1      14     133                                                          73   -3.17    0.07  1.0000
  11   2  -1       7     105                                                           7   -3.37   -0.70  1.0000
  11   2   1     213      84                                                         231   -2.03   -1.07  1.0000
 -11   2  -1     503     150                                                         386   -1.82    0.18  1.0000
  11  -2  -1       1     108                                                          34   -3.17   -0.07  1.0000
  11   2   1     209     128                                                         227   -2.03   -1.07  1.0000
  11   2   1     147     124                                                         160   -2.03   -1.07  1.0000
 -11   2  -1     244     138                                                         165   -1.82    0.18  1.0000
  12  -2   1    3487     358                                                        3682    1.08   -0.14  1.0000
  12   2   1    2524     299                                                        2688   -1.05    0.11  1.0000
 -12   2  -1    3396     327                                                        3592    1.08    0.14  1.0000
  12   2   1    3944     352                                                        4148   -1.05    0.11  1.0000
 -12   2  -1    3109     333                                                        3296    1.08    0.14  1.0000
  13  -2   1     268     166                                                         322   -1.03    0.07  1.0000
  13   2  -1      95     138                                                         165    2.04   -0.08  1.0000
  13   2  -1       0     130                                                           9    2.04   -0.08  1.0000
  13   2  -1       2     112                                                          20    2.04   -0.08  1.0000
 -13   2   1      74     143                                                         138    2.08   -0.16  1.0000
  13   2   1     329     155                                                         391   -1.07    0.00  1.0000
 -13   2  -1     166     159                                                         209   -1.03   -0.07  1.0000
  13   2   1      67     136                                                          97   -1.07    0.00  1.0000
 -13   2  -1     124     156                                                         162   -1.03   -0.07  1.0000
  13  -2  -1      86     144                                                         155    2.08    0.16  1.0000
  14   2  -1     111     131                                                         118   -0.22   -0.05  1.0000
  14  -2   1     147     154                                                         156    0.27    0.01  1.0000
  14  -2  -1     114     161                                                         122    0.23    0.07  1.0000
  14   2   1       0     118                                                         -56   -0.31    0.03  1.0000
  15  -2   1     133     191                                                         348    4.66    0.05  1.0000
  15  -2  -1       2     161                                                          19    3.69    0.12  1.0000
   0   3  -1    9826     262                                                        4214  -22.37    0.04  1.0000
   0   3   1   10459     275                                                        4637  -22.35    0.15  1.0000
   0   3  -1   10633     271                                                        4748  -22.37    0.04  1.0000
   0   3  -1   10640     327                                                        4753  -22.37    0.04  1.0000
   0   3   1   10212     266                                                        4473  -22.35    0.15  1.0000
   0   3  -1   10036     278                                                        4352  -22.37    0.04  1.0000
   0   3  -1    9862     270                                                        4238  -22.37    0.04  1.0000
   1   3  -1    2322     399                                                        6748   22.15    1.71  1.0000
   1   3  -1    2449     382                                                        6963   22.15    1.71  1.0000
  -1   3   1    2449     392                                                        7057  -22.49   -2.18  1.0000
  -1   3   1    2390     388                                                        6956  -22.49   -2.18  1.0000
  -1   3   1    2607     375                                                        7323  -22.49   -2.18  1.0000
  -1   3   1    2209     378                                                        6645  -22.49   -2.18  1.0000
   1   3  -1    2803     450                                                        7552   22.15    1.71  1.0000
   1   3  -1    2421     385                                                        6916   22.15    1.71  1.0000
   1   3  -1    2395     369                                                        6872   22.15    1.71  1.0000
  -1   3   1    2489     443                                                        7124  -22.49   -2.18  1.0000
  -1   3  -1    6413     388                                                        5911   -2.13    1.02  1.0000
  -1   3  -1    6149     441                                                        5658   -2.13    1.02  1.0000
  -1   3  -1    6364     377                                                        5864   -2.13    1.02  1.0000
   1   3   1    6250     380                                                        5916    1.47   -1.48  1.0000
   1   3   1    6105     395                                                        5775    1.47   -1.48  1.0000
   1   3   1    6535     431                                                        6194    1.47   -1.48  1.0000
   3  -3   1   31153    1396                                                       25661  -10.66   -0.16  1.0000
  -3  -3  -1   32139    1419                                                       26569   10.64   -0.04  1.0000
  -3  -3  -1   31702    1374                                                       26172   10.64   -0.04  1.0000
   3  -3   1   30955    1451                                                       25481  -10.66   -0.16  1.0000
   3   3   1   31695    1415                                                       26165   10.64    0.04  1.0000
  -3   3  -1   31537    1441                                                       26013  -10.66    0.16  1.0000
  -3   3  -1   31548    1613                                                       26023  -10.66    0.16  1.0000
   3   3   1   31483    1470                                                       25972   10.64    0.04  1.0000
  -3   3  -1   32137    1397                                                       26558  -10.66    0.16  1.0000
   3   3   1   30087    1581                                                       24706   10.64    0.04  1.0000
   4  -3   1   10283     328                                                        5892   16.11    0.37  1.0000
   4  -3   1    9807     339                                                        5533   16.11    0.37  1.0000
  -4  -3  -1    9871     321                                                        5588   16.09   -0.19  1.0000
  -4  -3  -1    9648     330                                                        5421   16.09   -0.19  1.0000
  -4   3  -1    9772     355                                                        5509   16.11   -0.37  1.0000
   4   3   1   10209     362                                                        5842   16.09    0.19  1.0000
  -4   3  -1    9829     410                                                        5552   16.11   -0.37  1.0000
   4   3   1    9810     347                                                        5541   16.09    0.19  1.0000
  -4   3  -1   10010     347                                                        5688   16.11   -0.37  1.0000
   4   3   1    9401     366                                                        5235   16.09    0.19  1.0000
  -5  -3  -1   17034    1222                                                       21960  -11.57    0.52  1.0000
   5  -3   1   16899    1411                                                       21894   11.75    0.05  1.0000
   5  -3   1   17140    1248                                                       22168   11.75    0.05  1.0000
   5  -3   1   18435    1203                                                       23638   11.75    0.05  1.0000
  -5  -3  -1   16328    1182                                                       21158  -11.57    0.52  1.0000
  -5   3  -1   17079    1249                                                       22098   11.75   -0.05  1.0000
   5   3   1   16904    1225                                                       21822  -11.57   -0.52  1.0000
   5   3   1   16166    1358                                                       20982  -11.57   -0.52  1.0000
   5   3   1   17585    1275                                                       22594  -11.57   -0.52  1.0000
  -5   3  -1   17334    1211                                                       22388   11.75   -0.05  1.0000
   8  -3   1    1379     212                                                        1159    2.02    0.03  1.0000
  -8  -3  -1    1192     136                                                         988    2.03   -0.01  1.0000
   8  -3   1    1208     126                                                        1003    2.02    0.03  1.0000
   8   3   1    1217     145                                                        1010    2.03    0.01  1.0000
  -8   3  -1    1272     162                                                        1062    2.02   -0.03  1.0000
  11  -3   1    1646     249                                                        1352    2.48    0.15  1.0000
  11   3   1    2365     236                                                        2012   -2.48    0.09  1.0000
  11   3   1    2288     219                                                        1941   -2.48    0.09  1.0000
  11   3   1    2503     247                                                        2139   -2.48    0.09  1.0000
 -11   3  -1    2638     258                                                        2264    2.48   -0.15  1.0000
 -11   3  -1    2243     254                                                        1899    2.48   -0.15  1.0000
  12   3  -1    1030     217                                                        1238   -2.01   -0.20  1.0000
 -12   3   1    1440     226                                                        1677   -1.96   -0.11  1.0000
 -12   3   1    1567     239                                                        1814   -1.96   -0.11  1.0000
  12   3  -1    1202     220                                                        1426   -2.01   -0.20  1.0000
  12   3  -1    1224     209                                                        1449   -2.01   -0.20  1.0000
  12  -3  -1    1340     263                                                        1568   -1.96    0.11  1.0000
 -13   3   1     139     146                                                         153    0.40    0.08  1.0000
  13   3  -1     395     155                                                         420   -0.43   -0.10  1.0000
 -13   3   1     235     153                                                         253    0.40    0.08  1.0000
  13   3  -1     108     140                                                         122   -0.43   -0.10  1.0000
  13   3  -1      49     132                                                          58   -0.43   -0.10  1.0000
  13  -3  -1     157     160                                                         173    0.40   -0.08  1.0000
  14  -3   1     444     214                                                         495    0.76    0.12  1.0000
  14   3  -1    1266     226                                                        1122    1.36    0.16  1.0000
  14   3   1     432     183                                                         483    0.77    0.08  1.0000
  14  -3  -1    1424     274                                                        1273    1.34    0.07  1.0000
 -14   3  -1     668     209                                                         729    0.76   -0.12  1.0000
  14   3   1     321     175                                                         365    0.77    0.08  1.0000
  15  -3   1     646     236                                                         643    0.03    0.00  1.0000
  15   3   1     673     218                                                         669   -0.05    0.01  1.0000
   0   4  -1    7260     622                                                        9658    8.55    0.46  1.0000
   0   4  -1    6727     549                                                        9042    8.55    0.46  1.0000
   0   4  -1    7013     540                                                        9373    8.55    0.46  1.0000
   0   4  -1    7298     531                                                        9702    8.55    0.46  1.0000
   0   4  -1    6956     523                                                        9307    8.55    0.46  1.0000
   0   4   1    6839     539                                                        9080   -8.23   -0.63  1.0000
   0   4   1    6819     522                                                        9057   -8.23   -0.63  1.0000
  -1   4  -1    1418     191                                                        2734   -9.59    0.04  1.0000
   1   4   1    1526     197                                                        2886   -9.58   -0.31  1.0000
   1   4   1    1202     211                                                        2433   -9.58   -0.31  1.0000
  -1   4  -1    1214     222                                                        2448   -9.59    0.04  1.0000
  -1   4  -1    1415     186                                                        2730   -9.59    0.04  1.0000
   1   4   1    1496     189                                                        2845   -9.58   -0.31  1.0000
   2   4  -1    6906     455                                                        8402   -5.60    0.09  1.0000
   2   4  -1    6316     438                                                        7750   -5.60    0.09  1.0000
  -2   4   1    6395     534                                                        7893    5.80    0.05  1.0000
  -2   4   1    6604     442                                                        8125    5.80    0.05  1.0000
  -2   4   1    6823     476                                                        8368    5.80    0.05  1.0000
   2   4  -1    6424     466                                                        7870   -5.60    0.09  1.0000
  -2   4   1    6697     462                                                        8228    5.80    0.05  1.0000
   2   4  -1    5798     531                                                        7175   -5.60    0.09  1.0000
   2   4  -1    6454     484                                                        7903   -5.60    0.09  1.0000
  -2   4   1    5931     458                                                        7376    5.80    0.05  1.0000
   3  -4   1    6493     684                                                       12391   20.09   -0.07  1.0000
   3  -4   1    6547     710                                                       12466   20.09   -0.07  1.0000
  -3  -4  -1    6363     670                                                       12199   20.06   -0.32  1.0000
  -3   4  -1    6461     816                                                       12347   20.09    0.07  1.0000
  -3   4  -1    6634     720                                                       12586   20.09    0.07  1.0000
   3   4   1    6528     789                                                       12427   20.06    0.32  1.0000
   3   4   1    5980     693                                                       11666   20.06    0.32  1.0000
  -3   4  -1    6644     698                                                       12599   20.09    0.07  1.0000
   3   4   1    6587     734                                                       12509   20.06    0.32  1.0000
   3   4   1    6440     704                                                       12306   20.06    0.32  1.0000
  -6   4   1    1808     177                                                        2118   -2.29    0.22  1.0000
   6  -4   1    1792     138                                                        1702    0.70   -0.10  1.0000
   6   4  -1    1779     177                                                        2076    2.22   -0.21  1.0000
  -6  -4  -1    1682     140                                                        1583   -0.80   -0.08  1.0000
   6   4  -1    1685     175                                                        1974    2.22   -0.21  1.0000
   6   4  -1    1347     165                                                        1607    2.22   -0.21  1.0000
  -6  -4  -1    1511     141                                                        1417   -0.80   -0.08  1.0000
   6  -4   1    1250     204                                                        1175    0.70   -0.10  1.0000
  -6   4   1    1801     183                                                        2110   -2.29    0.22  1.0000
   6  -4   1    1760     143                                                        1671    0.70   -0.10  1.0000
  -6   4  -1    1696     177                                                        1608    0.70    0.10  1.0000
  -6  -4   1    1782     129                                                        2080    2.22    0.21  1.0000
  -6   4  -1    1645     179                                                        1559    0.70    0.10  1.0000
   6   4   1    1484     157                                                        1391   -0.80    0.08  1.0000
   6   4   1    1625     165                                                        1528   -0.80    0.08  1.0000
   6   4   1    1630     165                                                        1533   -0.80    0.08  1.0000
   7  -4   1    7237     465                                                        5162   -8.66    0.06  1.0000
  -7  -4  -1    7907     361                                                        5724   -8.68   -0.03  1.0000
  -7  -4  -1    8024     352                                                        5824   -8.68   -0.03  1.0000
   7  -4   1    8650     372                                                        6365   -8.66    0.06  1.0000
   7  -4   1    8467     359                                                        6208   -8.66    0.06  1.0000
  -7   4  -1    7658     381                                                        5517   -8.66   -0.06  1.0000
   7   4   1    7612     395                                                        5474   -8.68    0.03  1.0000
   7   4   1    7862     384                                                        5686   -8.68    0.03  1.0000
  -7   4  -1    7480     391                                                        5366   -8.66   -0.06  1.0000
   7   4   1    7623     401                                                        5483   -8.68    0.03  1.0000
   8  -4   1    1279     166                                                        1907   -5.17   -0.13  1.0000
   8  -4   1    1366     273                                                        2014   -5.17   -0.13  1.0000
   8   4   1    1282     198                                                        1907    5.14   -0.12  1.0000
   8   4   1     994     190                                                        1552    5.14   -0.12  1.0000
  -8   4  -1    1162     198                                                        1764   -5.17    0.13  1.0000
  -8   4  -1     894     198                                                        1430   -5.17    0.13  1.0000
   8   4   1    1025     181                                                        1590    5.14   -0.12  1.0000
   9  -4   1      53     129                                                         -18    4.76    0.17  1.0000
   9   4  -1     129     108                                                         346    4.82    0.11  1.0000
  -9   4   1      47     114                                                         196    4.83   -0.05  1.0000
   9   4  -1     114     111                                                         321    4.82    0.11  1.0000
   9   4  -1      57      97                                                         217    4.82    0.11  1.0000
  -9   4   1     142     115                                                         365    4.83   -0.05  1.0000
   9   4   1     113      88                                                          50    4.78    0.10  1.0000
   9  -4  -1      49     166                                                         202    4.83    0.05  1.0000
  -9   4  -1      53      99                                                         -44    4.76   -0.17  1.0000
   9   4   1      53      85                                                         -45    4.78    0.10  1.0000
   9   4   1      71      91                                                          13    4.78    0.10  1.0000
  -9   4  -1      53     104                                                         -16    4.76   -0.17  1.0000
  10  -4   1     534     236                                                         962    5.18   -0.15  1.0000
  10   4  -1    1775     158                                                        1016   -6.71    0.03  1.0000
 -10   4   1    2096     182                                                        1263    6.69    0.26  1.0000
 -10   4   1    2008     188                                                        1195    6.69    0.26  1.0000
  10   4  -1    1783     169                                                        1022   -6.71    0.03  1.0000
  10   4   1     442     170                                                         845   -5.26   -0.10  1.0000
 -10   4  -1     504     188                                                         922    5.18    0.15  1.0000
  10   4   1     573     179                                                        1023   -5.26   -0.10  1.0000
 -10   4  -1     498     184                                                         914    5.18    0.15  1.0000
  10   4   1     501     181                                                         926   -5.26   -0.10  1.0000
  10  -4  -1    1908     238                                                        1119    6.69   -0.26  1.0000
  11   4  -1     978     169                                                         851   -1.38   -0.03  1.0000
 -12   4   1     723     189                                                         955   -2.62    0.05  1.0000
  12   4  -1     833     200                                                        1081    2.63    0.23  1.0000
  12   4  -1     805     197                                                        1049    2.63    0.23  1.0000
 -12   4   1     842     199                                                        1091   -2.62    0.05  1.0000
  12  -4   1     444     206                                                         452    0.13   -0.02  1.0000
  12   4  -1     396     147                                                         572    2.63    0.23  1.0000
 -12   4  -1     574     189                                                         584    0.13    0.02  1.0000
 -12   4  -1     562     190                                                         572    0.13    0.02  1.0000
  12  -4  -1    1015     266                                                        1287   -2.62   -0.05  1.0000
  12   4   1     630     181                                                         636   -0.08    0.14  1.0000
  12   4   1     589     175                                                         595   -0.08    0.14  1.0000
 -13   4   1    2399     268                                                        2013   -2.69   -0.01  1.0000
 -13   4   1    2909     294                                                        2482   -2.69   -0.01  1.0000
  13   4  -1    2714     283                                                        2300   -2.71    0.01  1.0000
  13   4  -1    2562     276                                                        2160   -2.71    0.01  1.0000
  13  -4  -1    2770     338                                                        2354   -2.69    0.01  1.0000
  14   4   1    2011     276                                                        1635    2.88    0.02  1.0000
 -14   4  -1    1900     283                                                        1532   -2.91    0.06  1.0000
  14   4   1    1982     270                                                        1609    2.88    0.02  1.0000
 -14   4  -1    1927     266                                                        1556   -2.91    0.06  1.0000
  15   4  -1    1832     299                                                        1725   -0.83    0.06  1.0000
  15   4  -1    1847     282                                                        1740   -0.83    0.06  1.0000
  15  -4  -1    1692     337                                                        1587   -0.84   -0.09  1.0000
   0   5   1    1009      63                                                         148  -13.10    0.60  1.0000
   0   5  -1    1096      62                                                         170  -13.42    0.53  1.0000
   0   5  -1    1121      65                                                         180  -13.42    0.53  1.0000
   0   5   1    1009      57                                                         148  -13.10    0.60  1.0000
   0   5  -1     864      99                                                          85  -13.42    0.53  1.0000
   0   5  -1    1033      62                                                         145  -13.42    0.53  1.0000
   0   5   1    1024      65                                                         154  -13.10    0.60  1.0000
   0   5   1     908      47                                                         110  -13.10    0.60  1.0000
   0   5  -1    1133      60                                                         185  -13.42    0.53  1.0000
  -1   5  -1    6116     313                                                        5050    4.66    0.24  1.0000
  -1   5  -1    5457     364                                                        4453    4.66    0.24  1.0000
   1   5   1    5844     326                                                        4791   -4.72   -0.41  1.0000
  -1   5  -1    5840     318                                                        4800    4.66    0.24  1.0000
   1   5   1    5971     359                                                        4906   -4.72   -0.41  1.0000
   1   5   1    6222     315                                                        5134   -4.72   -0.41  1.0000
   4   5  -1     887     123                                                         592   -3.56   -0.26  1.0000
  -4   5   1     988     120                                                         676   -3.56   -0.13  1.0000
  -4   5   1    1052     123                                                         729   -3.56   -0.13  1.0000
   4   5  -1    1108     124                                                         775   -3.56   -0.26  1.0000
   4   5  -1    1092     122                                                         761   -3.56   -0.26  1.0000
   4   5  -1    1041      80                                                         719   -3.56   -0.26  1.0000
  -4   5   1    1179     156                                                         835   -3.56   -0.13  1.0000
  -4  -5   1    1115      76                                                         784   -3.56    0.26  1.0000
   4  -5  -1    1078      79                                                         752   -3.56    0.13  1.0000
   4  -5  -1    1077      83                                                         751   -3.56    0.13  1.0000
  -5   5  -1    1215     140                                                         977    2.35    0.10  1.0000
  -6  -5  -1   11771     771                                                       13696   -5.60    0.59  1.0000
   6  -5   1    9611     914                                                       11467   -5.89   -0.74  1.0000
  -6  -5  -1   11868     747                                                       13801   -5.60    0.59  1.0000
   6  -5   1   12939     794                                                       15080   -5.89   -0.74  1.0000
   6  -5   1   12467     762                                                       14570   -5.89   -0.74  1.0000
   6   5   1   11244     795                                                       13139   -5.60   -0.59  1.0000
  -6   5  -1   11748     814                                                       13777   -5.89    0.74  1.0000
   6   5   1   10957     870                                                       12828   -5.60   -0.59  1.0000
   6   5   1   11121     824                                                       13006   -5.60   -0.59  1.0000
  -6   5  -1   11327     785                                                       13320   -5.89    0.74  1.0000
   7  -5   1    1298     228                                                        1555   -2.23   -0.04  1.0000
   9  -5   1     718     231                                                         871    1.78    0.13  1.0000
   9   5   1     708     166                                                         857   -1.75    0.02  1.0000
  -9   5  -1     809     176                                                         970    1.78   -0.13  1.0000
   9   5   1     833     171                                                         994   -1.75    0.02  1.0000
  -9   5  -1     941     190                                                        1114    1.78   -0.13  1.0000
  10  -5   1    2384     351                                                        2668   -1.85   -0.14  1.0000
  11  -5   1    1272     325                                                        1696    3.62   -0.05  1.0000
  12   5  -1     898     216                                                        1208   -3.14    0.05  1.0000
 -12   5   1     721     216                                                         997   -3.09   -0.08  1.0000
  12  -5   1     512     268                                                         794   -3.63    0.19  1.0000
  12   5  -1    1027     223                                                        1357   -3.14    0.05  1.0000
 -12   5   1     862     213                                                        1161   -3.09   -0.08  1.0000
  12   5   1     446     193                                                         716   -3.69   -0.09  1.0000
  12   5   1     634     208                                                         950   -3.69   -0.09  1.0000
 -12   5  -1     653     233                                                         968   -3.63   -0.19  1.0000
 -12   5  -1     414     196                                                         671   -3.63   -0.19  1.0000
  12  -5  -1     884     290                                                        1186   -3.09    0.08  1.0000
 -13   5   1      43     144                                                         167   -4.18   -0.03  1.0000
  13   5  -1      73     149                                                         221    4.13   -0.04  1.0000
 -13   5   1      98     171                                                         266   -4.18   -0.03  1.0000
  13  -5   1       3     199                                                         114   -5.97   -0.06  1.0000
  13   5  -1       2     146                                                          62    4.13   -0.04  1.0000
  13  -5  -1      20     214                                                         119   -4.18    0.03  1.0000
  13   5   1      51     158                                                         262    5.95    0.06  1.0000
  13   5   1      16     156                                                         171    5.95    0.06  1.0000
 -13   5  -1      31     163                                                         214   -5.97    0.06  1.0000
 -13   5  -1     110     173                                                         384   -5.97    0.06  1.0000
  14  -5   1     570     262                                                         678    1.41   -0.03  1.0000
  14   5  -1     540     181                                                         495    0.65   -0.01  1.0000
 -14   5   1     621     202                                                         567    0.72    0.07  1.0000
 -14   5   1     723     219                                                         665    0.72    0.07  1.0000
  14   5  -1     609     199                                                         561    0.65   -0.01  1.0000
 -14   5  -1     577     211                                                         685    1.41    0.03  1.0000
  14   5   1     655     214                                                         767    1.38    0.00  1.0000
  14  -5  -1     681     255                                                         625    0.72   -0.07  1.0000
  14   5   1     488     201                                                         585    1.38    0.00  1.0000
 -14   5  -1     592     205                                                         702    1.41    0.03  1.0000
 -15   5   1      41     171                                                          72    1.36    0.17  1.0000
  15   5  -1       1     154                                                           9   -1.37    0.05  1.0000
 -15   5   1      14     186                                                          34    1.36    0.17  1.0000
  15   5  -1       8     152                                                          23   -1.37    0.05  1.0000
 -15   5  -1      25     203                                                          85   -2.80    0.08  1.0000
  15   5   1      33     174                                                         100    2.83    0.08  1.0000
 -15   5  -1      18     190                                                          -2   -2.80    0.08  1.0000
  16   5  -1       0     173                                                         -14    0.30   -0.06  1.0000
  16   5   1     509     210                                                         503   -0.08   -0.01  1.0000
   0   6  -1   17296    1172                                                       20661    7.99    0.23  1.0000
   0   6  -1   18040    1161                                                       21474    7.99    0.23  1.0000
   0   6   1   17693    1198                                                       21061   -7.92   -0.02  1.0000
   0   6  -1   17465    1197                                                       20846    7.99    0.23  1.0000
   0   6  -1   19017    1362                                                       22538    7.99    0.23  1.0000
   0   6   1   16894    1218                                                       20188   -7.92   -0.02  1.0000
   0   6   1   18426    1162                                                       21860   -7.92   -0.02  1.0000
   0   6  -1   17499    1218                                                       20883    7.99    0.23  1.0000
  -1   6  -1    1351     111                                                        1213   -1.26    0.63  1.0000
   4   6  -1    1650     292                                                        2872   -8.49    0.25  1.0000
   4   6  -1    2095     213                                                        3450   -8.49    0.25  1.0000
  -4   6   1    2192     264                                                        3596    8.61   -0.14  1.0000
   4   6  -1    2143     265                                                        3512   -8.49    0.25  1.0000
   4   6  -1    1988     272                                                        3312   -8.49    0.25  1.0000
  -4   6   1    2237     320                                                        3654    8.61   -0.14  1.0000
  -4   6   1    2199     270                                                        3606    8.61   -0.14  1.0000
   4   6  -1    1967     218                                                        3285   -8.49    0.25  1.0000
   4  -6  -1    2118     226                                                        3504    8.61    0.14  1.0000
  -5  -6  -1    1745     163                                                        2225   -3.53   -0.13  1.0000
   5  -6   1    1798     168                                                        2287   -3.55   -0.15  1.0000
   5  -6   1    1670     172                                                        2142   -3.55   -0.15  1.0000
  -5  -6  -1    1727     164                                                        2205   -3.53   -0.13  1.0000
  -5   6  -1    1796     259                                                        2286   -3.55    0.15  1.0000
  -5   6  -1    1742     203                                                        2224   -3.55    0.15  1.0000
   5   6   1    1850     226                                                        2345   -3.53    0.13  1.0000
  -5   6  -1    1677     208                                                        2151   -3.55    0.15  1.0000
   5   6   1    1628     203                                                        2094   -3.53    0.13  1.0000
   5   6   1    1732     211                                                        2212   -3.53    0.13  1.0000
   7   6  -1     612     142                                                         758   -1.83    0.09  1.0000
  -7   6   1     550     143                                                         687   -1.79   -0.27  1.0000
   7   6  -1     531     150                                                         668   -1.83    0.09  1.0000
  -7   6   1     438     130                                                         561   -1.79   -0.27  1.0000
   7   6  -1     556     137                                                         696   -1.83    0.09  1.0000
   7  -6  -1     668     194                                                         817   -1.79    0.27  1.0000
   8   6  -1     326     116                                                         184    2.92    0.22  1.0000
   8  -6   1     366     136                                                          90   -6.33   -0.05  1.0000
  -8   6   1     300     112                                                         166   -2.93    0.08  1.0000
   8   6  -1     332     112                                                         189    2.92    0.22  1.0000
  -8   6   1     387     114                                                         232   -2.93    0.08  1.0000
   8   6  -1     412     109                                                         250    2.92    0.22  1.0000
  -8   6  -1     161     101                                                           9   -6.33    0.05  1.0000
   8   6   1     496      97                                                         162    6.26   -0.04  1.0000
   8  -6  -1     460     160                                                         288   -2.93   -0.08  1.0000
  -8   6  -1     176      90                                                          13   -6.33    0.05  1.0000
   8   6   1     384      99                                                         101    6.26   -0.04  1.0000
   9   6  -1     727     163                                                         696   -0.38   -0.04  1.0000
   9   6  -1     813     161                                                         780   -0.38   -0.04  1.0000
  -9   6   1     824     166                                                         792   -0.36   -0.18  1.0000
   9  -6   1    1162     288                                                        1431    2.44    0.16  1.0000
   9   6  -1     639     156                                                         610   -0.38   -0.04  1.0000
  -9   6   1     890     179                                                         857   -0.36   -0.18  1.0000
  -9   6  -1     967     191                                                        1212    2.44   -0.16  1.0000
  -9   6  -1     869     195                                                        1102    2.44   -0.16  1.0000
   9   6   1     902     187                                                        1139    2.43    0.01  1.0000
   9  -6  -1     981     248                                                         948   -0.36    0.18  1.0000
   9   6   1     886     186                                                        1122    2.43    0.01  1.0000
  10  -6   1    2237     343                                                        2057    1.27    0.00  1.0000
 -10   6  -1    2346     255                                                        2161    1.27    0.00  1.0000
  10   6   1    2286     248                                                        2097   -1.33    0.16  1.0000
  10   6   1    2199     246                                                        2014   -1.33    0.16  1.0000
 -10   6  -1    2334     271                                                        2150    1.27    0.00  1.0000
  11   6  -1    1604     222                                                        1414   -1.60    0.00  1.0000
 -11   6   1    1858     245                                                        1647   -1.65    0.11  1.0000
  11  -6  -1    1702     322                                                        1500   -1.65   -0.11  1.0000
  12  -6   1     255     203                                                         227    0.56    0.21  1.0000
  12   6  -1       1     132                                                          11    2.94    0.22  1.0000
 -12   6   1     169     173                                                         306   -2.93   -0.28  1.0000
 -12   6   1     156     160                                                         288   -2.93   -0.28  1.0000
  12   6  -1      70     136                                                         165    2.94    0.22  1.0000
  12  -6  -1      20     169                                                          -9   -2.93    0.28  1.0000
 -12   6  -1     452     171                                                         418    0.56   -0.21  1.0000
 -12   6  -1     287     149                                                         260    0.56   -0.21  1.0000
  12   6   1     347     167                                                         319   -0.53    0.15  1.0000
  12   6   1     339     163                                                         311   -0.53    0.15  1.0000
  13  -6   1       1     179                                                         -22   -0.76   -0.04  1.0000
  13   6  -1     443     173                                                         401   -0.66   -0.12  1.0000
  13   6  -1     280     153                                                         247   -0.66   -0.12  1.0000
 -13   6   1     435     190                                                         397   -0.59   -0.26  1.0000
 -13   6   1     374     167                                                         339   -0.59   -0.26  1.0000
  13   6   1       1     147                                                          -5   -0.79   -0.11  1.0000
  13  -6  -1     151     200                                                         130   -0.59    0.26  1.0000
  13   6   1     180     150                                                         149   -0.79   -0.11  1.0000
 -13   6  -1     127     149                                                         102   -0.76    0.04  1.0000
 -13   6  -1       1     152                                                          -3   -0.76    0.04  1.0000
 -14   6   1      80     158                                                          49   -1.36   -0.04  1.0000
  14   6  -1      96     157                                                          63    1.35    0.13  1.0000
 -14   6   1       4     168                                                          -7   -1.36   -0.04  1.0000
  14   6  -1       4     133                                                         -36    1.35    0.13  1.0000
  14   6   1      53     159                                                         106    2.00    0.10  1.0000
 -14   6  -1      10     177                                                         -14   -2.02   -0.07  1.0000
 -14   6  -1     150     167                                                         235   -2.02   -0.07  1.0000
  15   6  -1     142     179                                                         211    1.72   -0.04  1.0000
 -15   6   1     185     196                                                         263    1.71   -0.12  1.0000
  15   6   1     103     181                                                          52    1.92   -0.01  1.0000
 -15   6  -1     247     201                                                         166    1.86   -0.04  1.0000
  16   6  -1     826     242                                                         797   -0.33    0.02  1.0000
 -16   6   1     853     256                                                         828    0.28    0.01  1.0000
   0   7   1    3592     309                                                        4417   -4.27    0.05  1.0000
   0   7  -1    3468     305                                                        4294   -4.34    0.03  1.0000
   0   7   1    3434     304                                                        4242   -4.27    0.05  1.0000
   0   7  -1    3841     376                                                        4708   -4.34    0.03  1.0000
   0   7   1    3630     300                                                        4459   -4.27    0.05  1.0000
   0   7  -1    3503     305                                                        4333   -4.34    0.03  1.0000
   0   7  -1    3491     295                                                        4320   -4.34    0.03  1.0000
   0   7  -1    3639     296                                                        4484   -4.34    0.03  1.0000
  -1   7   1    6739     358                                                        4462  -10.00   -0.20  1.0000
  -1   7   1    6377     299                                                        4168  -10.00   -0.20  1.0000
   1   7  -1    6810     374                                                        4508   10.05    0.13  1.0000
   1   7  -1    6550     299                                                        4297   10.05    0.13  1.0000
   1   7  -1    6444     296                                                        4211   10.05    0.13  1.0000
  -1   7   1    6164     308                                                        3996  -10.00   -0.20  1.0000
  -1   7   1    6960     302                                                        4642  -10.00   -0.20  1.0000
   1   7  -1    6621     289                                                        4354   10.05    0.13  1.0000
  -1   7   1    6991     293                                                        4667  -10.00   -0.20  1.0000
   1   7  -1    6519     311                                                        4272   10.05    0.13  1.0000
  -2   7   1    2295     218                                                        2438   -0.96    0.07  1.0000
   2   7  -1    2269     189                                                        2400   -0.89   -0.08  1.0000
   2   7  -1    2177     204                                                        2306   -0.89   -0.08  1.0000
  -2   7   1    2289     210                                                        2432   -0.96    0.07  1.0000
  -2   7   1    2533     254                                                        2683   -0.96    0.07  1.0000
  -2   7   1    2271     185                                                        2413   -0.96    0.07  1.0000
   2   7  -1    2578     265                                                        2718   -0.89   -0.08  1.0000
  -2   7   1    2230     176                                                        2371   -0.96    0.07  1.0000
   2   7  -1    2151     209                                                        2279   -0.89   -0.08  1.0000
   2   7  -1    2342     183                                                        2476   -0.89   -0.08  1.0000
   4   7  -1    7257     533                                                        8093    3.12   -0.31  1.0000
  -4   7   1    7643     528                                                        8514    3.17   -0.16  1.0000
  -4   7   1    6397     462                                                        7196    3.17   -0.16  1.0000
   4   7  -1    6559     472                                                        7355    3.12   -0.31  1.0000
  -4   7   1    7746     511                                                        8623    3.17   -0.16  1.0000
   4   7  -1    7754     522                                                        8617    3.12   -0.31  1.0000
   4   7  -1    7261     460                                                        8097    3.12   -0.31  1.0000
  -4   7   1    7610     601                                                        8479    3.17   -0.16  1.0000
   4  -7  -1    7207     485                                                        8053    3.17    0.16  1.0000
   7   7  -1    2126     254                                                        2825    4.61    0.14  1.0000
  -7   7   1    1838     244                                                        2489   -4.58   -0.26  1.0000
   7   7  -1    1641     260                                                        2262    4.61    0.14  1.0000
   7   7  -1    2051     262                                                        2739    4.61    0.14  1.0000
  -7   7   1    2042     259                                                        2725   -4.58   -0.26  1.0000
   7  -7  -1    2028     320                                                        2704   -4.58    0.26  1.0000
   8   7  -1    1133     167                                                         896   -2.43   -0.18  1.0000
   8   7  -1    1106     178                                                         872   -2.43   -0.18  1.0000
  -8   7   1    1341     179                                                        1081   -2.45    0.03  1.0000
  -8   7   1    1188     176                                                         944   -2.45    0.03  1.0000
   8   7  -1    1406     176                                                        1141   -2.43   -0.18  1.0000
   8  -7  -1    1190     237                                                         946   -2.45   -0.03  1.0000
   9  -7   1    1434     264                                                        1081   -3.27    0.04  1.0000
   9   7   1    1446     195                                                        1084    3.35   -0.09  1.0000
   9  -7  -1     670     245                                                         667    0.07   -0.22  1.0000
   9   7   1    1480     188                                                        1113    3.35   -0.09  1.0000
  -9   7  -1    1454     195                                                        1098   -3.27   -0.04  1.0000
  -9   7  -1    1866     222                                                        1459   -3.27   -0.04  1.0000
  10   7  -1     189     139                                                         353    3.30    0.01  1.0000
  10  -7   1     100     186                                                         186    2.39   -0.23  1.0000
  10   7  -1      60     132                                                         163    3.30    0.01  1.0000
 -10   7   1     101     139                                                         226    3.27    0.13  1.0000
 -10   7   1     137     146                                                         279    3.27    0.13  1.0000
  10  -7  -1      62     184                                                         165    3.27   -0.13  1.0000
  10   7   1     170     131                                                         282    2.45   -0.01  1.0000
 -10   7  -1     424     173                                                         589    2.39    0.23  1.0000
  10   7   1     327     159                                                         476    2.45   -0.01  1.0000
 -10   7  -1     191     141                                                         306    2.39    0.23  1.0000
  11   7  -1     133     134                                                         107    0.77   -0.14  1.0000
 -11   7   1     114     147                                                          91   -0.75    0.03  1.0000
  11  -7   1      73     193                                                         111    1.34   -0.15  1.0000
  11   7  -1     109     140                                                          86    0.77   -0.14  1.0000
 -11   7   1     232     154                                                         198   -0.75    0.03  1.0000
 -11   7  -1     127     154                                                         178    1.34    0.15  1.0000
  11  -7  -1     146     234                                                         120   -0.75   -0.03  1.0000
 -11   7  -1     192     142                                                         253    1.34    0.15  1.0000
  11   7   1     118     132                                                         169   -1.37   -0.21  1.0000
  11   7   1     210     132                                                         276   -1.37   -0.21  1.0000
  12  -7   1      14     215                                                          43    1.86    0.11  1.0000
  12   7  -1       3     132                                                           2    0.37    0.09  1.0000
 -12   7   1     210     162                                                         193    0.37   -0.11  1.0000
 -12   7   1      99     148                                                          88    0.37   -0.11  1.0000
  12   7  -1       0     125                                                          -4    0.37    0.09  1.0000
  12   7   1       2     128                                                          19    1.89    0.12  1.0000
 -12   7  -1       8     141                                                          -3    1.86   -0.11  1.0000
 -12   7  -1      72     146                                                         128    1.86   -0.11  1.0000
  12  -7  -1      62     215                                                          56    0.37    0.11  1.0000
  12   7   1       2     123                                                          17    1.89    0.12  1.0000
  13   7  -1     263     167                                                         218    0.97   -0.17  1.0000
 -13   7   1     183     175                                                         145   -0.99    0.08  1.0000
  13   7   1    1152     237                                                        1122    0.29    0.09  1.0000
 -13   7  -1     962     236                                                         934   -0.30    0.09  1.0000
  13  -7  -1     204     247                                                         163   -0.99   -0.08  1.0000
  13   7   1    1105     216                                                        1075    0.29    0.09  1.0000
 -13   7  -1    1179     232                                                        1149   -0.30    0.09  1.0000
  14   7  -1      17     144                                                          69   -2.74    0.11  1.0000
 -14   7   1      38     171                                                         109   -2.79   -0.05  1.0000
 -14   7  -1     457     215                                                         489   -0.48   -0.02  1.0000
  14   7   1     103     168                                                         120   -0.54    0.06  1.0000
  15   7  -1     149     174                                                         146    0.08   -0.01  1.0000
 -15   7   1     357     200                                                         351   -0.12    0.07  1.0000
 -15   7  -1     829     244                                                         726   -1.21    0.11  1.0000
  15   7   1     753     225                                                         654    1.22   -0.06  1.0000
   0   8   1     566     130                                                         779   -2.70    0.06  1.0000
   0   8  -1     657     133                                                         880    2.64    0.09  1.0000
   0   8  -1     561     127                                                         769    2.64    0.09  1.0000
   0   8  -1     545     128                                                         750    2.64    0.09  1.0000
   0   8   1     563     131                                                         775   -2.70    0.06  1.0000
   0   8  -1     604     122                                                         819    2.64    0.09  1.0000
   0   8   1     434     112                                                         623   -2.70    0.06  1.0000
   0   8  -1     524     169                                                         725    2.64    0.09  1.0000
  -3   8   1    2072     216                                                        1957   -0.85    0.11  1.0000
   3   8   1    1257     143                                                        1390    1.19    0.25  1.0000
  -3   8  -1    1380     184                                                        1510    1.12    0.08  1.0000
  -3   8  -1    1411     224                                                        1543    1.12    0.08  1.0000
  -3   8  -1    1308     133                                                        1435    1.12    0.08  1.0000
   3   8   1    1415     144                                                        1556    1.19    0.25  1.0000
   3   8   1    1494     212                                                        1639    1.19    0.25  1.0000
   3   8   1    1290     183                                                        1425    1.19    0.25  1.0000
   3   8   1    1163     179                                                        1291    1.19    0.25  1.0000
  -3   8  -1    1556     194                                                        1694    1.12    0.08  1.0000
   4   8  -1     316     111                                                         282   -0.65   -0.14  1.0000
   4   8  -1     369     141                                                         332   -0.65   -0.14  1.0000
  -4   8   1     346     113                                                         311    0.65    0.25  1.0000
   4  -8   1      74      63                                                          79   -0.28   -0.33  1.0000
  -4   8   1     334     112                                                         300    0.65    0.25  1.0000
   4   8  -1     506     122                                                         463   -0.65   -0.14  1.0000
  -4   8   1     227     127                                                         199    0.65    0.25  1.0000
  -4   8  -1     128     101                                                         142   -0.28    0.33  1.0000
   4   8   1      56     106                                                          61    0.19   -0.13  1.0000
   4   8   1      40      85                                                          45    0.19   -0.13  1.0000
  -4   8  -1      13     115                                                          18   -0.28    0.33  1.0000
  -4   8  -1      62      91                                                          72   -0.28    0.33  1.0000
   4   8   1     106      89                                                         113    0.19   -0.13  1.0000
  -6   8  -1    1030     181                                                        1091    0.61    0.04  1.0000
  -6   8  -1    1178     182                                                        1244    0.61    0.04  1.0000
   6   8   1    1130     199                                                        1199   -0.66    0.08  1.0000
   6   8   1    1107     190                                                        1175   -0.66    0.08  1.0000
  -6   8  -1     767     193                                                         820    0.61    0.04  1.0000
  -7   8   1    1369     214                                                        1521   -1.30   -0.03  1.0000
  -7   8   1    1315     204                                                        1464   -1.30   -0.03  1.0000
   7   8  -1    1563     215                                                        1721   -1.27   -0.09  1.0000
   7   8  -1    1432     210                                                        1583   -1.27   -0.09  1.0000
   7   8  -1    1217     223                                                        1356   -1.27   -0.09  1.0000
   7  -8  -1    1248     235                                                        1393   -1.30    0.03  1.0000
 -10   8   1     152     150                                                         311    3.49   -0.33  1.0000
  10   8  -1      63     129                                                         175   -3.50    0.27  1.0000
  10   8  -1      16     125                                                          86   -3.50    0.27  1.0000
 -10   8   1       8     134                                                          65    3.49   -0.33  1.0000
  10  -8   1     172     185                                                          70    3.10    0.15  1.0000
 -10   8  -1     516     150                                                         325    3.10   -0.15  1.0000
 -10   8  -1     198     127                                                          88    3.10   -0.15  1.0000
  10   8   1     250     123                                                         123   -3.12    0.13  1.0000
  10  -8  -1      39     193                                                         135    3.49    0.33  1.0000
  10   8   1      23     118                                                         -37   -3.12    0.13  1.0000
 -11   8   1     300     154                                                         199    2.53    0.01  1.0000
 -11   8   1      69     137                                                          24    2.53    0.01  1.0000
  11  -8   1     218     188                                                         149    1.66    0.22  1.0000
  11   8  -1     337     136                                                         229    2.55    0.03  1.0000
  11   8  -1      58     113                                                          17    2.55    0.03  1.0000
  11  -8  -1      46     194                                                          11    2.53   -0.01  1.0000
  11   8   1     249     134                                                         177    1.63   -0.13  1.0000
 -11   8  -1     162     138                                                         105    1.66   -0.22  1.0000
 -11   8  -1     179     151                                                         118    1.66   -0.22  1.0000
  11   8   1     228     137                                                         160    1.63   -0.13  1.0000
 -12   8   1     431     203                                                         678   -3.46   -0.08  1.0000
  12   8  -1     360     188                                                         588    3.45   -0.10  1.0000
 -12   8   1     325     197                                                         544   -3.46   -0.08  1.0000
  12   8  -1     312     187                                                         526    3.45   -0.10  1.0000
  12   8   1     687     196                                                         686   -0.01   -0.03  1.0000
 -12   8  -1    1083     243                                                        1082    0.01   -0.10  1.0000
  12   8   1     733     204                                                         732   -0.01   -0.03  1.0000
 -12   8  -1     713     200                                                         712    0.01   -0.10  1.0000
  12  -8  -1     490     278                                                         752   -3.46    0.08  1.0000
 -13   8   1     510     211                                                         590   -1.10   -0.12  1.0000
  13   8  -1     375     193                                                         443   -1.09   -0.02  1.0000
 -13   8  -1     658     232                                                         682    0.31    0.00  1.0000
  13   8   1     664     212                                                         688    0.30   -0.06  1.0000
 -14   8   1     431     187                                                         377    0.88    0.02  1.0000
  14   8  -1     424     206                                                         371   -0.86   -0.02  1.0000
 -14   8  -1    1015     273                                                        1153   -1.37    0.02  1.0000
  14   8   1     801     236                                                         926    1.39    0.00  1.0000
 -15   8   1     851     246                                                         919   -0.74   -0.01  1.0000
   0   9   1     392      66                                                         112    6.38   -0.01  1.0000
   0   9  -1      94      71                                                          -5    6.33   -0.06  1.0000
   0   9   1     128      41                                                           3    6.38   -0.01  1.0000
   0   9  -1     166      61                                                          12    6.33   -0.06  1.0000
   0   9  -1     179      73                                                          16    6.33   -0.06  1.0000
   0   9   1     262      74                                                          47    6.38   -0.01  1.0000
   0   9   1     334      78                                                          81    6.38   -0.01  1.0000
   0   9   1     187      92                                                          18    6.38   -0.01  1.0000
   0   9  -1      94     104                                                         -32    6.33   -0.06  1.0000
   0   9  -1     182      58                                                          17    6.33   -0.06  1.0000
  -1   9  -1    1180     115                                                         987    1.92   -0.07  1.0000
   4   9  -1    5620     395                                                        5580    0.17    0.06  1.0000
  -4   9   1    5189     385                                                        5149    0.18    0.06  1.0000
   4   9  -1    5502     462                                                        5463    0.17    0.06  1.0000
  -4   9   1    5764     411                                                        5722    0.18    0.06  1.0000
  -4   9   1    4960     445                                                        4921    0.18    0.06  1.0000
   4   9  -1    5161     401                                                        5123    0.17    0.06  1.0000
   6   9   1    4214     382                                                        4856    3.13   -0.28  1.0000
   6   9   1    4175     392                                                        4814    3.13   -0.28  1.0000
  -6   9  -1    4029     437                                                        4650    3.10   -0.18  1.0000
  -6   9  -1    4408     381                                                        5057    3.10   -0.18  1.0000
  -6   9  -1    3832     383                                                        4439    3.10   -0.18  1.0000
   7   9  -1      69     116                                                         105    1.25   -0.14  1.0000
  -7   9   1     111     123                                                         154   -1.23    0.11  1.0000
   7   9  -1     162     125                                                         215    1.25   -0.14  1.0000
  -7   9   1     155     128                                                         206   -1.23    0.11  1.0000
   7  -9  -1      28     116                                                          51   -1.23   -0.11  1.0000
  -7   9  -1     455     154                                                         508   -0.79    0.11  1.0000
   7   9   1     191     123                                                         228    0.83   -0.23  1.0000
   7   9   1     573     157                                                         635    0.83   -0.23  1.0000
  -7   9  -1     395     151                                                         445   -0.79    0.11  1.0000
   9   9  -1     643     146                                                         438   -2.89    0.03  1.0000
   9  -9   1     260     186                                                         282   -0.45    0.11  1.0000
   9   9  -1     606     153                                                         408   -2.89    0.03  1.0000
  -9   9   1     533     139                                                         348    2.90   -0.09  1.0000
  -9   9   1     534     140                                                         349    2.90   -0.09  1.0000
   9  -9  -1     573     194                                                         380    2.90    0.09  1.0000
  -9   9  -1     289     144                                                         313   -0.45   -0.11  1.0000
   9   9   1     281     153                                                         304    0.44    0.14  1.0000
  -9   9  -1     382     156                                                         409   -0.45   -0.11  1.0000
   9   9   1     295     156                                                         319    0.44    0.14  1.0000
  10   9  -1     379     149                                                         325   -0.95    0.03  1.0000
 -10   9   1     586     161                                                         523   -0.87   -0.07  1.0000
  10   9  -1     289     142                                                         242   -0.95    0.03  1.0000
 -10   9   1     540     168                                                         480   -0.87   -0.07  1.0000
  10  -9  -1     781     247                                                         710   -0.87    0.07  1.0000
 -11   9   1      26     119                                                          62    1.80   -0.04  1.0000
  11   9  -1      39     122                                                          81   -1.79   -0.06  1.0000
  11   9  -1       8     135                                                         -19   -1.79   -0.06  1.0000
 -11   9   1     144     144                                                         218    1.80   -0.04  1.0000
 -11   9  -1      37     136                                                         105    2.77    0.05  1.0000
 -11   9  -1       0     139                                                          22    2.77    0.05  1.0000
  11  -9  -1      84     199                                                         142    1.80    0.04  1.0000
  11   9   1      61     141                                                         144   -2.77   -0.02  1.0000
 -12   9   1     605     201                                                         694    1.15    0.02  1.0000
  12   9  -1     339     181                                                         406    1.15   -0.07  1.0000
  12   9   1     682     195                                                         582   -1.30   -0.05  1.0000
 -12   9  -1     964     220                                                         841   -1.34   -0.12  1.0000
  13   9  -1     103     162                                                          85    0.62    0.06  1.0000
 -13   9   1     151     166                                                         129   -0.60   -0.03  1.0000
  13   9   1     183     159                                                         179   -0.10   -0.01  1.0000
 -13   9  -1     194     200                                                         188    0.15    0.06  1.0000
 -14   9   1     101     192                                                         144    1.27    0.22  1.0000
  14   9  -1     217     193                                                         277    1.25    0.16  1.0000
   0  10  -1    2476     231                                                        2566    0.59    0.17  1.0000
   0  10  -1    2421     298                                                        2510    0.59    0.17  1.0000
   0  10  -1    2629     243                                                        2721    0.59    0.17  1.0000
   0  10  -1    2567     227                                                        2658    0.59    0.17  1.0000
   0  10  -1    2382     230                                                        2470    0.59    0.17  1.0000
   0  10   1    2643     244                                                        2744   -0.64    0.04  1.0000
   0  10   1    2367     228                                                        2463   -0.64    0.04  1.0000
   0  10   1    1834     258                                                        1918   -0.64    0.04  1.0000
   2  10  -1    1221     221                                                        1387    1.51   -0.06  1.0000
  -2  10   1    1265     189                                                        1431   -1.48    0.03  1.0000
  -2  10   1    1094     176                                                        1249   -1.48    0.03  1.0000
  -2  10   1    1232     220                                                        1396   -1.48    0.03  1.0000
  -2  10  -1     653     161                                                         963   -3.62    0.16  1.0000
   2  10   1     703     150                                                        1021    3.59   -0.19  1.0000
   2  10   1     797     192                                                        1133    3.59   -0.19  1.0000
  -2  10  -1     568     164                                                         860   -3.62    0.16  1.0000
   2  10   1     525     142                                                         804    3.59   -0.19  1.0000
   2  10   1     483     155                                                         751    3.59   -0.19  1.0000
   2  10   1     580     159                                                         871    3.59   -0.19  1.0000
  -2  10  -1     569     211                                                         861   -3.62    0.16  1.0000
  -2  10  -1     651     174                                                         961   -3.62    0.16  1.0000
   4  10  -1    2717     257                                                        2516   -1.29    0.10  1.0000
   4  10  -1    3119     318                                                        2904   -1.29    0.10  1.0000
  -4  10   1    3011     256                                                        2796    1.31   -0.07  1.0000
  -4  10   1    2453     285                                                        2259    1.31   -0.07  1.0000
  -4  10   1    3156     272                                                        2935    1.31   -0.07  1.0000
   4  10  -1    2828     255                                                        2623   -1.29    0.10  1.0000
  -4  10  -1    2453     256                                                        2460   -0.04    0.00  1.0000
  -4  10  -1    2486     306                                                        2493   -0.04    0.00  1.0000
  -4  10  -1    2107     251                                                        2113   -0.04    0.00  1.0000
   4  10   1    2259     247                                                        2264    0.03   -0.05  1.0000
   4  10   1    2352     261                                                        2357    0.03   -0.05  1.0000
  -5  10   1    3718     346                                                        4377    3.39    0.01  1.0000
  -5  10   1    3241     392                                                        3858    3.39    0.01  1.0000
   5  10  -1    3993     366                                                        4674    3.38    0.15  1.0000
  -5  10   1    3552     359                                                        4196    3.39    0.01  1.0000
   5  10  -1    3709     368                                                        4366    3.38    0.15  1.0000
   6  10   1    1868     208                                                        1351   -4.23    0.10  1.0000
   6  10   1    2064     235                                                        1518   -4.23    0.10  1.0000
  -6  10  -1    1580     226                                                        1110    4.21    0.01  1.0000
  -6  10  -1    2074     232                                                        1530    4.21    0.01  1.0000
  -6  10  -1    1899     210                                                        1380    4.21    0.01  1.0000
   7  10  -1     323     149                                                         377   -0.94    0.05  1.0000
   7  10  -1     274     144                                                         324   -0.94    0.05  1.0000
  -7  10   1     391     154                                                         448   -0.92   -0.18  1.0000
  -7  10   1     203     140                                                         245   -0.92   -0.18  1.0000
   7  10   1     265     140                                                         315    1.00    0.26  1.0000
   7  10   1     358     152                                                         416    1.00    0.26  1.0000
  -7  10  -1     426     156                                                         494    1.02   -0.19  1.0000
  -7  10  -1     203     137                                                         251    1.02   -0.19  1.0000
   7 -10  -1     199     157                                                         241   -0.92    0.18  1.0000
  -8  10   1     621     180                                                         677   -0.73    0.03  1.0000
   8  10  -1     519     171                                                         567    0.68    0.01  1.0000
   8 -10   1     463     173                                                         373   -1.43   -0.01  1.0000
   8  10  -1     476     166                                                         522    0.68    0.01  1.0000
  -8  10   1     410     150                                                         456   -0.73    0.03  1.0000
   8 -10  -1     533     201                                                         586   -0.73   -0.03  1.0000
  -8  10  -1     603     167                                                         500   -1.43    0.01  1.0000
  -8  10  -1     706     172                                                         594   -1.43    0.01  1.0000
   8  10   1     353     147                                                         280    1.35   -0.05  1.0000
   8  10   1     485     161                                                         398    1.35   -0.05  1.0000
  -9  10   1     717     200                                                         776   -0.72    0.06  1.0000
   9 -10   1     214     191                                                         285   -1.45   -0.22  1.0000
  -9  10   1     696     182                                                         755   -0.72    0.06  1.0000
   9  10  -1     527     177                                                         579   -0.72    0.00  1.0000
   9  10  -1     722     188                                                         782   -0.72    0.00  1.0000
  -9  10  -1     307     167                                                         388   -1.45    0.22  1.0000
   9 -10  -1     658     242                                                         716   -0.72   -0.06  1.0000
  -9  10  -1     291     163                                                         370   -1.45    0.22  1.0000
   9  10   1     108     141                                                         157   -1.40    0.04  1.0000
   9  10   1      96     150                                                         142   -1.40    0.04  1.0000
 -10  10   1     205     146                                                         204    0.04   -0.04  1.0000
 -10  10   1     282     158                                                         280    0.04   -0.04  1.0000
  10 -10  -1     114     194                                                         113    0.04    0.04  1.0000
  11  10  -1     680     194                                                         680    0.00    0.00  1.0000
 -11  10   1     910     208                                                         907    0.03    0.01  1.0000
  11  10   1     581     200                                                         588   -0.10    0.14  1.0000
 -11  10  -1     634     193                                                         640   -0.09    0.07  1.0000
 -12  10  -1    1299     276                                                        1509    1.84    0.05  1.0000
  12  10   1     921     250                                                        1101   -1.86    0.05  1.0000
 -13  10   1     410     208                                                         410    0.00    0.04  1.0000
  13  10  -1     705     218                                                         705    0.00    0.02  1.0000
   0  11   1      79      80                                                          27   -2.41   -0.04  1.0000
   0  11   1      87      42                                                          32   -2.41   -0.04  1.0000
   0  11  -1     167     132                                                          84   -2.46   -0.15  1.0000
   0  11  -1     118      76                                                          50   -2.46   -0.15  1.0000
   0  11  -1      60      76                                                          16   -2.46   -0.15  1.0000
   0  11  -1     234      73                                                         133   -2.46   -0.15  1.0000
   0  11   1     111     104                                                          47   -2.41   -0.04  1.0000
   0  11   1      63      39                                                          18   -2.41   -0.04  1.0000
   0  11   1      14      77                                                         -25   -2.41   -0.04  1.0000
   0  11  -1      70      73                                                          21   -2.46   -0.15  1.0000
  -2  11   1     242     139                                                         196   -1.02    0.11  1.0000
   2  11  -1     249     103                                                         202   -1.02   -0.13  1.0000
   2  11  -1      97     125                                                          69   -1.02   -0.13  1.0000
   2  11  -1     103      89                                                          74   -1.02   -0.13  1.0000
  -2  11   1     301     120                                                         250   -1.02    0.11  1.0000
  -2  11   1     223     112                                                         179   -1.02    0.11  1.0000
   2  11   1     282     113                                                         281   -0.02   -0.06  1.0000
   2  11   1     389     124                                                         388   -0.02   -0.06  1.0000
  -2  11  -1     283     163                                                         284    0.02    0.07  1.0000
  -2  11  -1     170     115                                                         171    0.02    0.07  1.0000
  -2  11  -1     217     120                                                         218    0.02    0.07  1.0000
  -3  11  -1     944     219                                                         982    0.40    0.03  1.0000
  -3  11  -1     911     184                                                         948    0.40    0.03  1.0000
   3  11   1     858     175                                                         900   -0.47    0.02  1.0000
   3  11   1     873     177                                                         916   -0.47    0.02  1.0000
   4  11  -1    1648     236                                                        1500    1.22   -0.16  1.0000
  -4  11   1    1569     231                                                        1429    1.18    0.05  1.0000
  -4  11   1    1692     227                                                        1547    1.18    0.05  1.0000
   4  11  -1    1535     223                                                        1392    1.22   -0.16  1.0000
  -4  11   1    1653     251                                                        1509    1.18    0.05  1.0000
  -6  11   1     118     124                                                         209   -2.36   -0.13  1.0000
  -6  11   1     216     145                                                         335   -2.36   -0.13  1.0000
   6  11  -1     180     136                                                         298   -2.52    0.29  1.0000
   6  11  -1     201     136                                                         325   -2.52    0.29  1.0000
   6  11   1     384     150                                                         422   -0.63    0.28  1.0000
  -6  11  -1     350     147                                                         379   -0.49   -0.15  1.0000
  -6  11  -1     306     138                                                         333   -0.49   -0.15  1.0000
  -6  11  -1     257     161                                                         282   -0.49   -0.15  1.0000
   6  11   1     270     143                                                         302   -0.63    0.28  1.0000
   8  11  -1      82     142                                                         234   -4.06    0.34  1.0000
  -8  11   1      76     140                                                         214   -3.87   -0.12  1.0000
   8  11  -1      33     141                                                         143   -4.06    0.34  1.0000
  -8  11   1      69     137                                                         203   -3.87   -0.12  1.0000
   8 -11   1       1     125                                                          36   -3.14    0.13  1.0000
   8  11   1      51     134                                                         149   -3.30    0.23  1.0000
   8 -11  -1      33     159                                                         137   -3.87    0.12  1.0000
  -8  11  -1       4     129                                                          45   -3.14   -0.13  1.0000
  -8  11  -1     100     146                                                         219   -3.14   -0.13  1.0000
   8  11   1      16     132                                                          82   -3.30    0.23  1.0000
  -9  11   1    1199     244                                                        1281    0.77   -0.02  1.0000
   9  11  -1    1133     236                                                        1215   -0.78    0.03  1.0000
   9 -11  -1    1433     348                                                        1523    0.77    0.02  1.0000
  10  11  -1     189     175                                                         281    1.98   -0.11  1.0000
 -10  11   1     278     188                                                         386    1.95   -0.07  1.0000
  10  11   1     495     191                                                         450   -0.68   -0.11  1.0000
 -10  11  -1     217     163                                                         186   -0.72    0.06  1.0000
  11  11   1    2061     323                                                        2276    1.52   -0.03  1.0000
  12  11  -1     808     220                                                         879    0.80    0.02  1.0000
 -12  11   1     655     214                                                         725    0.87    0.01  1.0000
   0  12  -1     877     232                                                         968   -0.97   -0.06  1.0000
   0  12   1     657     162                                                         738    1.01   -0.08  1.0000
   2  12  -1     298     147                                                         546   -3.99   -0.01  1.0000
  -2  12   1     337     156                                                         597    3.97   -0.08  1.0000
   2  12   1     484     106                                                         226   -4.60    0.06  1.0000
   2  12   1     285      98                                                          98   -4.60    0.06  1.0000
  -2  12  -1     255     107                                                          82    4.55   -0.07  1.0000
  -2  12  -1     267     142                                                          89    4.55   -0.07  1.0000
  -2  12  -1     377     120                                                         157    4.55   -0.07  1.0000
   3  12  -1    1251     208                                                        1382   -1.18    0.06  1.0000
   3  12  -1    1282     207                                                        1414   -1.18    0.06  1.0000
   4  12  -1      76     126                                                         240    4.48    0.14  1.0000
   4  12  -1     105     127                                                         291    4.48    0.14  1.0000
  -4  12   1     135     164                                                         341   -4.51   -0.13  1.0000
  -4  12   1      95     137                                                         276   -4.51   -0.13  1.0000
  -4  12   1     108     142                                                         297   -4.51   -0.13  1.0000
   4  12   1      17     105                                                          86    3.42    0.13  1.0000
  -4  12  -1      37     115                                                         126   -3.44   -0.14  1.0000
  -4  12  -1      65     154                                                         175   -3.44   -0.14  1.0000
   4  12   1      10     105                                                          67    3.42    0.13  1.0000
  -4  12  -1      72     117                                                         186   -3.44   -0.14  1.0000
  -5  12   1    1130     191                                                         890    2.48   -0.03  1.0000
  -5  12   1    1267     201                                                        1012    2.48   -0.03  1.0000
  -5  12   1    1378     240                                                        1111    2.48   -0.03  1.0000
   5  12  -1    1170     192                                                         924    2.49    0.04  1.0000
   5  12  -1    1136     194                                                         894    2.49    0.04  1.0000
  -5  12  -1     117     120                                                         124   -0.20    0.05  1.0000
   7  12  -1      96     124                                                         112    0.46    0.34  1.0000
   7  12  -1     109     140                                                         125    0.46    0.34  1.0000
  -7  12   1      76     133                                                          90    0.50    0.04  1.0000
  -7  12   1     174     135                                                         195    0.50    0.04  1.0000
   7 -12  -1      73     141                                                          87    0.50   -0.04  1.0000
  -7  12  -1      18     130                                                         -21    2.73    0.14  1.0000
   7  12   1     292     146                                                         232    2.70    0.35  1.0000
   9  12  -1     317     157                                                         244   -1.41   -0.22  1.0000
  -9  12   1     135     159                                                          89   -1.44   -0.13  1.0000
   9  12   1     181     155                                                         131   -1.31   -0.14  1.0000
  -9  12  -1       4     149                                                         -52   -1.32   -0.08  1.0000
 -10  12   1     795     218                                                         726    0.81    0.12  1.0000
  10  12  -1     585     187                                                         526   -0.81   -0.07  1.0000
 -10  12  -1     136     175                                                         192    1.44    0.09  1.0000
  10  12   1     188     177                                                         254   -1.46   -0.06  1.0000
  -1  13   1     287     127                                                         202    1.79   -0.20  1.0000
  -1  13  -1      28     145                                                          69    2.00   -0.14  1.0000
   2  13  -1     363      98                                                         233   -2.54   -0.09  1.0000
  -2  13   1     268     127                                                         155   -2.61   -0.12  1.0000
   2  13  -1     115      98                                                          48   -2.54   -0.09  1.0000
  -2  13   1     282     111                                                         166   -2.61   -0.12  1.0000
  -2  13  -1      17     100                                                          27   -0.68   -0.18  1.0000
   2  13   1      33      92                                                          45   -0.64   -0.10  1.0000
  -2  13  -1     103     152                                                         125   -0.68   -0.18  1.0000
  -2  13  -1      33     107                                                          46   -0.68   -0.18  1.0000
  -3  13   1      35     130                                                          23   -0.71   -0.03  1.0000
  -3  13   1     151     116                                                         126   -0.71   -0.03  1.0000
  -3  13   1     105     114                                                          84   -0.71   -0.03  1.0000
   3  13  -1     148     100                                                         121    0.76    0.17  1.0000
   3  13  -1       1      97                                                         -22    0.76    0.17  1.0000
  -3  13  -1      99     115                                                         135   -1.09   -0.04  1.0000
  -3  13  -1       3     103                                                          -3   -1.09   -0.04  1.0000
  -3  13  -1     154     163                                                         198   -1.09   -0.04  1.0000
   3  13   1     159     106                                                         207    1.17    0.08  1.0000
   3  13   1      77     111                                                         111    1.17    0.08  1.0000
  -4  13   1    1525     241                                                        1601    0.64   -0.11  1.0000
   4  13  -1    1506     230                                                        1578    0.61   -0.16  1.0000
  -4  13   1    1717     287                                                        1798    0.64   -0.11  1.0000
  -4  13   1    1672     258                                                        1752    0.64   -0.11  1.0000
  -5  13   1     564     192                                                         560   -0.05   -0.06  1.0000
   5  13  -1     430     167                                                         423    0.12    0.06  1.0000
   5  13  -1     576     162                                                         567    0.12    0.06  1.0000
  -5  13   1     456     174                                                         453   -0.05   -0.06  1.0000
  -6  13   1    1311     274                                                        1602    2.50   -0.10  1.0000
   6  13  -1    1508     285                                                        1821    2.51    0.02  1.0000
  -7  13   1     475     191                                                         629    2.16   -0.10  1.0000
   7  13  -1     429     181                                                         573   -2.11    0.02  1.0000
  -8  13  -1    1826     286                                                        1652    1.36    0.02  1.0000
   8  13   1    1590     264                                                        1428    1.37    0.01  1.0000
   3  14  -1     951     196                                                         839    1.23   -0.11  1.0000
  -3  14   1    1160     229                                                        1036    1.22    0.04  1.0000
  -3  14  -1    1009     224                                                        1084    0.76   -0.01  1.0000
  -4  14   1      76     142                                                         171   -2.88   -0.05  1.0000
   4  14  -1      43     125                                                         119    2.86   -0.06  1.0000
  -4  14  -1      33     138                                                          98   -2.75   -0.08  1.0000
   4  14   1     112     139                                                         219    2.79    0.07  1.0000
  -5  14   1    1200     240                                                        1116    0.81   -0.06  1.0000
   5  14  -1    1174     222                                                        1098    0.75   -0.15  1.0000
  -6  14   1     326     181                                                         328    0.03    0.08  1.0000
   6  14  -1     350     166                                                         352   -0.03   -0.02  1.0000
   6  14   1      79     142                                                         101    0.84    0.07  1.0000
  -6  14  -1       2     126                                                         -33   -0.89    0.04  1.0000
   0   0  -2   22272      38                                                         332  109.46   -0.04  1.0000
   0   0  -2   21894      35                                                         380  109.46   -0.04  1.0000
   0   0   2   22025      36                                                         363  109.46    0.04  1.0000
  -2   0  -2    1699      54                                                         260   16.43   -0.07  1.0000
   2   0   2    1882      53                                                         334   16.43    0.07  1.0000
  -2   0   2     549      34                                                         313    3.79    0.16  1.0000
   2   0  -2     632      46                                                         374    3.79   -0.16  1.0000
   2   0   2    1894      54                                                         339   16.43    0.07  1.0000
   2   0   2    1885      63                                                         335   16.43    0.07  1.0000
  -2   0  -2    1765      57                                                         286   16.43   -0.07  1.0000
  -4   0   2    8320     419                                                        7195    4.18   -0.16  1.0000
   4   0  -2    9194     444                                                        8012    4.18    0.16  1.0000
   4   0  -2    8838     426                                                        7680    4.18    0.16  1.0000
  -6   0   2    2812     117                                                        1202   12.10    0.11  1.0000
   6   0  -2    3058     117                                                        1360   12.10   -0.11  1.0000
   6   0  -2    3338     157                                                        1549   12.10   -0.11  1.0000
  -6   0   2    2991     121                                                        1320   12.10    0.11  1.0000
   6   0  -2    2986     119                                                        1312   12.10   -0.11  1.0000
  -8   0  -2    4470     270                                                        3279    6.28   -0.01  1.0000
   8   0   2    4882     279                                                        3633    6.28    0.01  1.0000
   8   0   2    4907     267                                                        3654    6.28    0.01  1.0000
  -8   0  -2    4940     271                                                        3683    6.28   -0.01  1.0000
   8   0   2    4230     278                                                        3074    6.28    0.01  1.0000
  10   0  -2    1427     169                                                        1566    1.18   -0.04  1.0000
  10   0  -2    1404     193                                                        1542    1.18   -0.04  1.0000
  10   0  -2    1140     154                                                        1265    1.18   -0.04  1.0000
 -10   0   2    1621     184                                                        1769    1.18    0.04  1.0000
 -10   0   2    1127     169                                                        1251    1.18    0.04  1.0000
  12   0   2     544     181                                                         788    3.09    0.23  1.0000
  12   0  -2     677     150                                                         401    3.90    0.28  1.0000
  12   0   2     440     170                                                         661    3.09    0.23  1.0000
  12   0   2     561     175                                                         808    3.09    0.23  1.0000
  14   0  -2    1872     234                                                        1492    3.04   -0.03  1.0000
  16   0  -2     407     172                                                         397    0.15    0.05  1.0000
   0  -1  -2   11429     667                                                       12289   -2.58   -0.24  1.0000
   0   1  -2   10652     686                                                       11479    2.57   -0.08  1.0000
   0  -1  -2   10115     591                                                       10925   -2.58   -0.24  1.0000
   0  -1   2    9729     623                                                       10521    2.57    0.08  1.0000
   0   1  -2    9399     589                                                       10177    2.57   -0.08  1.0000
   0  -1  -2   10030     667                                                       10836   -2.58   -0.24  1.0000
  -3  -1  -2    7667     267                                                        4379  -13.99    0.24  1.0000
   3  -1   2    7861     268                                                        4539  -13.93    0.16  1.0000
  -3  -1  -2    7680     274                                                        4389  -13.99    0.24  1.0000
   3  -1   2    7619     276                                                        4355  -13.93    0.16  1.0000
   3   1   2    8299     296                                                        4857  -13.99   -0.24  1.0000
   3   1   2    7904     273                                                        4556  -13.99   -0.24  1.0000
  -3   1  -2    7737     280                                                        4443  -13.93   -0.16  1.0000
   3   1   2    7892     285                                                        4547  -13.99   -0.24  1.0000
  -3   1  -2    7647     272                                                        4375  -13.93   -0.16  1.0000
  -4   1   2      11      73                                                         475   12.12   -0.12  1.0000
   4   1  -2       7      71                                                         458  -12.26    0.24  1.0000
  -4   1   2      10      72                                                         472   12.12   -0.12  1.0000
   5  -1   2   22437    1539                                                       24900    5.24    0.03  1.0000
   5  -1   2   22950    1398                                                       25440    5.24    0.03  1.0000
  -5  -1  -2   22342    1327                                                       24796    5.23   -0.20  1.0000
  -5  -1  -2   22492    1369                                                       24954    5.23   -0.20  1.0000
   5  -1   2   22337    1343                                                       24795    5.24    0.03  1.0000
   5   1   2   22349    1513                                                       24807    5.23    0.20  1.0000
  -5   1  -2   20523    1372                                                       22881    5.24   -0.03  1.0000
  -5   1  -2   22256    1333                                                       24709    5.24   -0.03  1.0000
   5   1   2   21759    1403                                                       24185    5.23    0.20  1.0000
   5   1   2   21920    1349                                                       24355    5.23    0.20  1.0000
  -6   1   2     648     102                                                         751    1.29   -0.23  1.0000
   6   1  -2     621      97                                                         721   -1.26   -0.10  1.0000
   6  -1  -2     606     114                                                         708    1.29    0.23  1.0000
   8  -1   2    3579     273                                                        3830   -1.35   -0.05  1.0000
   8  -1   2    3848     287                                                        4108   -1.35   -0.05  1.0000
   8  -1   2    2909     304                                                        3135   -1.35   -0.05  1.0000
  -8  -1  -2    3556     280                                                        3797    1.30    0.05  1.0000
  -8  -1  -2    3389     273                                                        3624    1.30    0.05  1.0000
   8   1   2    3314     280                                                        3546    1.30   -0.05  1.0000
   8   1   2    3838     298                                                        4087    1.30   -0.05  1.0000
  -8   1  -2    3394     289                                                        3638   -1.35    0.05  1.0000
  -8   1  -2    3650     291                                                        3902   -1.35    0.05  1.0000
   9   1   2    1889     131                                                         950   -8.27    0.01  1.0000
  10  -1   2    2925     324                                                        3608   -3.92    0.05  1.0000
  10   1  -2    5499     314                                                        4810    3.14   -0.05  1.0000
  10  -1   2    2662     348                                                        3316   -3.92    0.05  1.0000
 -10  -1  -2    3000     321                                                        3685    3.88   -0.02  1.0000
 -10  -1  -2    3132     333                                                        3831    3.88   -0.02  1.0000
  10  -1   2    3255     324                                                        3974   -3.92    0.05  1.0000
 -10   1   2    5422     324                                                        4740   -3.13   -0.03  1.0000
 -10   1   2    5264     312                                                        4593   -3.13   -0.03  1.0000
  10   1  -2    5251     322                                                        4578    3.14   -0.05  1.0000
 -10   1  -2    3398     344                                                        4132   -3.92   -0.05  1.0000
  10  -1  -2    6016     308                                                        5297   -3.13    0.03  1.0000
  10   1   2    3326     350                                                        4046    3.88    0.02  1.0000
  10   1   2    3226     336                                                        3935    3.88    0.02  1.0000
 -10  -1   2    5204     317                                                        4534    3.14    0.05  1.0000
  10  -1  -2    5602     314                                                        4909   -3.13    0.03  1.0000
 -10   1  -2    2985     341                                                        3676   -3.92   -0.05  1.0000
  11  -1   2     669     152                                                         682   -0.18    0.27  1.0000
  11   1  -2      46     104                                                         145    3.52   -0.11  1.0000
 -11   1   2     110     124                                                         248    3.49    0.00  1.0000
  11   1  -2      62     100                                                         174    3.52   -0.11  1.0000
  11   1  -2     104     127                                                         241    3.52   -0.11  1.0000
 -11   1   2      34     113                                                         123    3.49    0.00  1.0000
  11  -1   2     600     160                                                         612   -0.18    0.27  1.0000
  11   1   2     633     151                                                         640   -0.10    0.38  1.0000
  11   1   2     141      68                                                         144   -0.10    0.38  1.0000
  11  -1  -2      70     137                                                         186    3.49    0.00  1.0000
  11   1   2     649     160                                                         656   -0.10    0.38  1.0000
 -11   1  -2     721     178                                                         737   -0.18   -0.27  1.0000
 -11   1  -2     704     176                                                         719   -0.18   -0.27  1.0000
  12  -1   2    1778     226                                                        1475    2.46    0.12  1.0000
 -12   1  -2    2003     243                                                        1682    2.46   -0.12  1.0000
  12   1   2    1986     238                                                        1660   -2.51    0.16  1.0000
  12   1   2    1957     242                                                        1633   -2.51    0.16  1.0000
 -12   1  -2    1787     237                                                        1484    2.46   -0.12  1.0000
  13  -1   2    1499     210                                                         997    4.68   -0.03  1.0000
  13   1  -2     685     171                                                         620   -0.82   -0.19  1.0000
  13   1   2    1427     199                                                         938    4.70   -0.24  1.0000
  13  -1  -2     755     201                                                         695   -0.73    0.02  1.0000
  13   1   2    1589     214                                                        1070    4.70   -0.24  1.0000
  14   1  -2     236     132                                                         176    1.38    0.00  1.0000
  14  -1   2     235     147                                                         197    0.84    0.00  1.0000
  14  -1  -2     164     149                                                         115   -1.36    0.05  1.0000
  15   1  -2     678     180                                                         718    0.50   -0.06  1.0000
  15  -1  -2     707     212                                                         746    0.49   -0.14  1.0000
  16   1  -2     297     153                                                         394    1.71    0.03  1.0000
  16  -1  -2     307     192                                                         404   -1.68   -0.07  1.0000
   0   2  -2    1581     113                                                        1645    0.52    0.21  1.0000
   0   2  -2    1685     148                                                        1751    0.52    0.21  1.0000
   0   2   2    1608     120                                                        1676    0.55   -0.08  1.0000
   0   2  -2    1303     106                                                        1361    0.52    0.21  1.0000
   0   2  -2    1578     119                                                        1642    0.52    0.21  1.0000
   0   2   2    1511     121                                                        1577    0.55   -0.08  1.0000
   0   2   2    1507     114                                                        1573    0.55   -0.08  1.0000
   1  -2   2    8302     596                                                       10594   -7.75    0.55  1.0000
  -1  -2  -2    8722     587                                                       11075    7.78   -0.79  1.0000
   1  -2   2    8428     620                                                       10736   -7.75    0.55  1.0000
  -1   2  -2    8969     613                                                       11360   -7.75   -0.55  1.0000
   1   2   2    8517     624                                                       10865    7.78    0.79  1.0000
  -1   2  -2    8517     594                                                       10851   -7.75   -0.55  1.0000
  -1   2  -2    8955     695                                                       11345   -7.75   -0.55  1.0000
   1   2   2    7092     603                                                        9247    7.78    0.79  1.0000
   1   2   2    8784     601                                                       11166    7.78    0.79  1.0000
   1   2   2    8764     664                                                       11144    7.78    0.79  1.0000
   2  -2   2    4816     714                                                       11893  -25.93    0.21  1.0000
  -2  -2  -2    4959     697                                                       12146  -26.01    0.13  1.0000
  -2  -2  -2    4855     675                                                       11983  -26.01    0.13  1.0000
   2  -2   2    4873     686                                                       11983  -25.93    0.21  1.0000
   2   2   2    5474     725                                                       12945  -26.01   -0.13  1.0000
   2   2   2    5581     698                                                       13109  -26.01   -0.13  1.0000
  -2   2  -2    5444     711                                                       12870  -25.93   -0.21  1.0000
  -2   2  -2    5464     690                                                       12900  -25.93   -0.21  1.0000
   2   2   2    4996     765                                                       12204  -26.01   -0.13  1.0000
  -2   2  -2    5914     805                                                       13587  -25.93   -0.21  1.0000
   3  -2   2   10451     404                                                        6794   12.97   -0.31  1.0000
  -3  -2  -2   10428     395                                                        6724  -13.19    0.62  1.0000
  -3  -2  -2   10428     384                                                        6724  -13.19    0.62  1.0000
   3  -2   2   10700     389                                                        6995   12.97   -0.31  1.0000
   3   2   2   10380     398                                                        6672  -13.19   -0.62  1.0000
  -3   2  -2   10600     398                                                        6908   12.97    0.31  1.0000
   3   2   2   10676     416                                                        6910  -13.19   -0.62  1.0000
  -3   2  -2   10616     465                                                        6921   12.97    0.31  1.0000
   3   2   2   10294     427                                                        6603  -13.19   -0.62  1.0000
  -3   2  -2   10460     408                                                        6795   12.97    0.31  1.0000
   6  -2   2   12915     792                                                       11497    4.20   -0.08  1.0000
  -6  -2  -2   11630     671                                                       10304    4.14   -0.20  1.0000
   6   2  -2   13172     756                                                       13673   -1.41    0.19  1.0000
   6  -2   2   12411     688                                                       11022    4.20   -0.08  1.0000
  -6  -2  -2   11725     652                                                       10394    4.14   -0.20  1.0000
   6  -2   2   11628     659                                                       10285    4.20   -0.08  1.0000
  -6   2   2   13693     666                                                       14187   -1.37    0.29  1.0000
   6   2  -2   13731     700                                                       14242   -1.41    0.19  1.0000
   6   2  -2   12574     671                                                       13063   -1.41    0.19  1.0000
   6  -2  -2   12406     780                                                       12876   -1.37   -0.29  1.0000
  -6   2  -2   11916     688                                                       10556    4.20    0.08  1.0000
   6   2   2   11869     675                                                       10529    4.14    0.20  1.0000
   6   2   2   12403     704                                                       11032    4.14    0.20  1.0000
  -6   2  -2   11844     668                                                       10488    4.20    0.08  1.0000
   6   2   2   11536     738                                                       10215    4.14    0.20  1.0000
  -7   2   2    1861     201                                                        2502    4.49   -0.18  1.0000
   7   2  -2    1973     204                                                        2617   -4.42   -0.15  1.0000
  -7   2   2    1905     210                                                        2553    4.49   -0.18  1.0000
   7   2  -2    1953     223                                                        2594   -4.42   -0.15  1.0000
   7   2  -2    2076     210                                                        2735   -4.42   -0.15  1.0000
   7  -2  -2    1727     173                                                        2343    4.49    0.18  1.0000
  -7  -2   2    1787     174                                                        2404   -4.42    0.15  1.0000
   7  -2  -2    2086     257                                                        2758    4.49    0.18  1.0000
  -7  -2   2    1660     168                                                        2257   -4.42    0.15  1.0000
   7  -2  -2    1860     179                                                        2497    4.49    0.18  1.0000
   8   2  -2    1574     213                                                        2544   -7.04   -0.17  1.0000
   8   2  -2    1640     220                                                        2628   -7.04   -0.17  1.0000
  -8   2   2    1694     221                                                        2677   -6.91   -0.21  1.0000
  -8   2   2    1785     218                                                        2791   -6.91   -0.21  1.0000
   8   2  -2    1613     226                                                        2594   -7.04   -0.17  1.0000
   8  -2  -2    1270     243                                                        2136   -6.91    0.21  1.0000
   8  -2  -2    1413     181                                                        2320   -6.91    0.21  1.0000
   8  -2  -2    1833     196                                                        2851   -6.91    0.21  1.0000
  -8  -2   2    1598     186                                                        2575   -7.04    0.17  1.0000
  -8  -2   2    1602     181                                                        2580   -7.04    0.17  1.0000
  -9  -2  -2    4721     372                                                        5592   -3.96   -0.16  1.0000
   9  -2   2    4540     366                                                        5382    3.92    0.06  1.0000
  -9  -2  -2    4024     368                                                        4831   -3.96   -0.16  1.0000
   9  -2   2    4710     382                                                        5567    3.92    0.06  1.0000
   9  -2   2    3735     426                                                        4502    3.92    0.06  1.0000
  -9   2  -2    4996     406                                                        5877    3.92   -0.06  1.0000
  -9   2  -2    4693     387                                                        5547    3.92   -0.06  1.0000
   9   2   2    4770     401                                                        5641   -3.96    0.16  1.0000
   9   2   2    4921     394                                                        5805   -3.96    0.16  1.0000
   9   2   2    4352     398                                                        5186   -3.96    0.16  1.0000
  10   2  -2     683     147                                                         773   -1.09    0.08  1.0000
  10  -2   2    2387     215                                                        1411   -7.39    0.15  1.0000
 -10   2   2     761     155                                                         866   -1.20    0.09  1.0000
  10  -2   2    2386     177                                                        1410   -7.39    0.15  1.0000
  10   2  -2     669     161                                                         758   -1.09    0.08  1.0000
  10  -2   2    2166     166                                                        1242   -7.39    0.15  1.0000
  10   2  -2     749     154                                                         843   -1.09    0.08  1.0000
 -10   2  -2    2234     205                                                        1294   -7.39   -0.15  1.0000
  10   2   2    2395     193                                                        1430   -7.28    0.63  1.0000
  10  -2  -2     689     185                                                         789   -1.20   -0.09  1.0000
  10   2   2    2227     166                                                        1301   -7.28    0.63  1.0000
  10   2   2    2290     199                                                        1349   -7.28    0.63  1.0000
 -10   2  -2    2209     202                                                        1275   -7.39   -0.15  1.0000
  12   2  -2     209     124                                                         174    0.83    0.38  1.0000
  12   2  -2     266     133                                                         226    0.83    0.38  1.0000
 -12   2   2     292     139                                                         257    0.69   -0.05  1.0000
  12   2  -2     336     140                                                         291    0.83    0.38  1.0000
 -12   2   2     214     127                                                         184    0.69   -0.05  1.0000
 -12   2  -2     419     187                                                         762    4.66   -0.09  1.0000
  12   2   2     277     159                                                         575    4.78    0.54  1.0000
  12   2   2     431     182                                                         790    4.78    0.54  1.0000
 -12   2  -2     281     178                                                         571    4.66   -0.09  1.0000
  12  -2  -2     225     158                                                         194    0.69    0.05  1.0000
  14   2  -2     147     127                                                          55   -3.07    0.13  1.0000
  14  -2   2     100     161                                                         181   -2.25   -0.12  1.0000
  14   2   2      12     139                                                         -21   -2.23   -0.14  1.0000
  14  -2  -2      21     147                                                         -59   -3.01   -0.27  1.0000
  15   2  -2     261     151                                                         226    0.73    0.03  1.0000
  15  -2   2     294     173                                                         307   -0.24    0.10  1.0000
  15  -2  -2     286     176                                                         249   -0.73   -0.04  1.0000
  16  -2  -2     336     210                                                         351   -0.27   -0.03  1.0000
   0   3   2    5650      92                                                         906   29.41    4.49  1.0000
   0   3  -2    5029      85                                                         785  -27.97   -3.66  1.0000
   0   3   2    5523      95                                                         855   29.41    4.49  1.0000
   0   3  -2    5181      84                                                         846  -27.97   -3.66  1.0000
   0   3  -2    5315      95                                                         901  -27.97   -3.66  1.0000
   0   3  -2    5459      91                                                         961  -27.97   -3.66  1.0000
   0   3  -2    5404     129                                                         938  -27.97   -3.66  1.0000
   0   3   2    5613     100                                                         891   29.41    4.49  1.0000
   1   3   2   45282    2439                                                       46501    1.86    0.15  1.0000
   1   3   2   44818    2518                                                       46031    1.86    0.15  1.0000
   3  -3   2    5685     680                                                       11622  -21.18   -0.27  1.0000
   3  -3   2    5879     655                                                       11899  -21.18   -0.27  1.0000
  -3  -3  -2    5659     643                                                       11577  -21.17    0.15  1.0000
  -3  -3  -2    5741     663                                                       11694  -21.17    0.15  1.0000
   3   3   2    6096     699                                                       12199  -21.17   -0.15  1.0000
  -3   3  -2    5812     685                                                       11800  -21.18    0.27  1.0000
  -3   3  -2    6071     776                                                       12168  -21.18    0.27  1.0000
  -3   3  -2    5625     662                                                       11533  -21.18    0.27  1.0000
   3   3   2    5380     734                                                       11177  -21.17   -0.15  1.0000
   3   3   2    6436     675                                                       12678  -21.17   -0.15  1.0000
   4  -3   2   16920     892                                                       16944    0.05    0.40  1.0000
  -4  -3  -2   16713     879                                                       16762   -0.12   -0.51  1.0000
   4  -3   2   16624     927                                                       16648    0.05    0.40  1.0000
  -4  -3  -2   16724     907                                                       16773   -0.12   -0.51  1.0000
   4   3   2   13645     992                                                       13684   -0.12    0.51  1.0000
  -4   3  -2   16093     927                                                       16112    0.05   -0.40  1.0000
   4   3   2   16325     911                                                       16368   -0.12    0.51  1.0000
  -4   3  -2   16062     897                                                       16081    0.05   -0.40  1.0000
   4   3   2   16403     945                                                       16446   -0.12    0.51  1.0000
  -4   3  -2   16013    1043                                                       16032    0.05   -0.40  1.0000
   5  -3   2   17106    1056                                                       19247   -5.19   -0.24  1.0000
  -5  -3  -2   17438    1077                                                       19613   -5.23   -0.08  1.0000
  -5  -3  -2   16339    1041                                                       18447   -5.23   -0.08  1.0000
  -5   3  -2   17240    1099                                                       19386   -5.19    0.24  1.0000
  -5   3  -2   17381    1065                                                       19535   -5.19    0.24  1.0000
   5   3   2   16296    1184                                                       18400   -5.23    0.08  1.0000
   5   3   2   17586    1121                                                       19769   -5.23    0.08  1.0000
   5   3   2   17222    1079                                                       19383   -5.23    0.08  1.0000
   6  -3   2    1956     349                                                        4067  -12.76   -0.63  1.0000
  -6  -3  -2    1669     258                                                        3606   12.55   -0.01  1.0000
   6  -3   2    1779     263                                                        3810  -12.76   -0.63  1.0000
   6  -3   2    1941     256                                                        4045  -12.76   -0.63  1.0000
  -6  -3  -2    1601     251                                                        3505   12.55   -0.01  1.0000
  -6   3  -2    1846     276                                                        3905  -12.76    0.63  1.0000
   6   3   2    1708     273                                                        3662   12.55    0.01  1.0000
   6   3   2    1616     273                                                        3527   12.55    0.01  1.0000
  -6   3  -2    1805     281                                                        3845  -12.76    0.63  1.0000
   6   3   2    1745     283                                                        3716   12.55    0.01  1.0000
   7  -3   2    1810     202                                                        1212    5.05    0.11  1.0000
  -7  -3  -2    1487     125                                                         953    5.04   -0.07  1.0000
  -7  -3  -2    1392     125                                                         877    5.04   -0.07  1.0000
   7  -3   2    1535     118                                                         989    5.05    0.11  1.0000
   7  -3   2    1736     131                                                        1152    5.05    0.11  1.0000
   7   3   2    1431     127                                                         908    5.04    0.07  1.0000
   7   3   2    1625     146                                                        1063    5.04    0.07  1.0000
  -7   3  -2    1510     150                                                         970    5.05   -0.11  1.0000
  -7   3  -2    1792     157                                                        1199    5.05   -0.11  1.0000
   7   3   2    1580     143                                                        1027    5.04    0.07  1.0000
  -8  -3  -2    1340     138                                                         875   -4.59   -0.19  1.0000
  -8   3   2     951     145                                                        1000    0.50    0.20  1.0000
  -8   3   2     979     152                                                        1029    0.50    0.20  1.0000
   8   3  -2     829     132                                                         881   -0.59    0.10  1.0000
   8  -3   2    1198     184                                                         759    4.61    0.29  1.0000
  -8  -3  -2    1339     136                                                         874   -4.59   -0.19  1.0000
   8   3  -2     876     133                                                         929   -0.59    0.10  1.0000
   8   3  -2    1045     151                                                        1103   -0.59    0.10  1.0000
   8  -3   2    1442     139                                                         955    4.61    0.29  1.0000
   8  -3   2    1522     129                                                        1020    4.61    0.29  1.0000
   8   3   2    1301     148                                                         846   -4.59    0.19  1.0000
   8   3   2    1179     130                                                         748   -4.59    0.19  1.0000
   8  -3  -2     943     103                                                         989    0.50   -0.20  1.0000
  -8   3  -2    1536     165                                                        1036    4.61   -0.29  1.0000
   8   3   2    1342     148                                                         879   -4.59    0.19  1.0000
   8  -3  -2     899     184                                                         944    0.50   -0.20  1.0000
  -8   3  -2    1577     164                                                        1070    4.61   -0.29  1.0000
   9  -3   2     354     123                                                         706   -5.08   -0.08  1.0000
   9  -3   2     304     194                                                         635   -5.08   -0.08  1.0000
   9  -3   2     441     138                                                         828   -5.08   -0.08  1.0000
   9   3   2     300     139                                                         630   -5.09   -0.11  1.0000
   9   3   2     448     157                                                         838   -5.09   -0.11  1.0000
   9   3   2     433     145                                                         817   -5.09   -0.11  1.0000
  -9   3  -2     432     167                                                         814   -5.08    0.08  1.0000
  -9   3  -2     453     166                                                         843   -5.08    0.08  1.0000
  10  -3   2    1651     247                                                        1307    2.95   -0.13  1.0000
 -10   3  -2    1996     218                                                        1613    2.95    0.13  1.0000
 -10   3  -2    1766     217                                                        1407    2.95    0.13  1.0000
  10   3   2    1781     207                                                        1419   -2.97   -0.06  1.0000
  10   3   2    1354     166                                                        1041   -2.97   -0.06  1.0000
  10   3   2    1679     203                                                        1328   -2.97   -0.06  1.0000
 -11   3   2    4214     340                                                        4140   -0.37    0.02  1.0000
  11   3  -2    5016     366                                                        4941   -0.35    0.19  1.0000
 -11   3   2    4363     355                                                        4288   -0.37    0.02  1.0000
  11   3  -2    3814     332                                                        3749   -0.35    0.19  1.0000
  11   3  -2    5056     387                                                        4981   -0.35    0.19  1.0000
  11  -3  -2    4218     416                                                        4144   -0.37   -0.02  1.0000
  12  -3   2    1576     279                                                        1971   -3.07   -0.09  1.0000
  13   3  -2    1424     234                                                        1424    0.00   -0.13  1.0000
  13   3  -2    1456     234                                                        1456    0.00   -0.13  1.0000
 -13   3   2    1432     242                                                        1432   -0.01    0.23  1.0000
  13   3  -2    1510     232                                                        1510    0.00   -0.13  1.0000
 -13   3   2    1484     236                                                        1484   -0.01    0.23  1.0000
  13  -3   2    1691     282                                                        1854    1.27    0.02  1.0000
  13   3   2    1895     269                                                        2062    1.24   -0.12  1.0000
  13   3   2    1891     267                                                        2058    1.24   -0.12  1.0000
 -13   3  -2    1649     277                                                        1810    1.27   -0.02  1.0000
  13  -3  -2    1690     307                                                        1692   -0.01   -0.23  1.0000
 -13   3  -2    1753     277                                                        1919    1.27   -0.02  1.0000
  14   3  -2      77     153                                                         140    1.99    0.03  1.0000
  14   3  -2       9     125                                                         -93    1.99    0.03  1.0000
  14  -3   2      91     169                                                         152   -1.83   -0.01  1.0000
  14   3  -2      73     146                                                         134    1.99    0.03  1.0000
  14  -3  -2       9     172                                                         -50   -1.91    0.09  1.0000
  14   3   2      24     153                                                          61    1.87    0.17  1.0000
  14   3   2      64     157                                                         118    1.87    0.17  1.0000
 -14   3  -2      57     170                                                         107   -1.83    0.01  1.0000
  15  -3   2     634     199                                                         551   -1.11   -0.06  1.0000
  15   3   2     600     204                                                         521   -1.10   -0.01  1.0000
  15  -3  -2     471     232                                                         573   -1.47    0.06  1.0000
   0   4   2     416     130                                                        1550   12.49    0.10  1.0000
   0   4  -2     429     126                                                        1575   12.50    0.00  1.0000
   0   4  -2     474     127                                                        1660   12.50    0.00  1.0000
   0   4  -2     442     167                                                        1599   12.50    0.00  1.0000
   0   4  -2     412     131                                                        1542   12.50    0.00  1.0000
   0   4  -2     479     124                                                        1670   12.50    0.00  1.0000
   0   4   2     423     148                                                        1563   12.49    0.10  1.0000
   0   4   2     432     126                                                        1579   12.49    0.10  1.0000
  -2   4   2    9741     692                                                       13328  -10.94   -0.41  1.0000
   2   4  -2    9109     741                                                       12585  -10.94   -0.42  1.0000
   2   4  -2    9580     707                                                       13138  -10.94   -0.42  1.0000
  -2   4   2    8811     717                                                       12236  -10.94   -0.41  1.0000
  -2   4   2    9100     726                                                       12576  -10.94   -0.41  1.0000
   2   4  -2    9477     824                                                       13018  -10.94   -0.42  1.0000
  -2   4   2    8843     701                                                       12273  -10.94   -0.41  1.0000
   2   4  -2    9259     714                                                       12762  -10.94   -0.42  1.0000
   2   4  -2    8870     683                                                       12304  -10.94   -0.42  1.0000
  -2   4   2    8615     808                                                       12004  -10.94   -0.41  1.0000
   3  -4   2     318      58                                                         204    2.40   -0.52  1.0000
   3   4  -2     842      43                                                         210    9.50    0.04  1.0000
  -3   4   2     929      77                                                         254   -9.51   -0.11  1.0000
  -3   4   2     746      38                                                         163   -9.51   -0.11  1.0000
  -3  -4  -2     319      54                                                         193   -2.66    0.45  1.0000
  -3   4   2     839      74                                                         208   -9.51   -0.11  1.0000
   3  -4   2     294      57                                                         185    2.40   -0.52  1.0000
   3   4  -2     970      76                                                         276    9.50    0.04  1.0000
  -3  -4  -2     357      56                                                         223   -2.66    0.45  1.0000
  -3   4   2    1006      92                                                         295   -9.51   -0.11  1.0000
   3   4  -2    1053      97                                                         321    9.50    0.04  1.0000
   3   4  -2    1014      79                                                         300    9.50    0.04  1.0000
   3   4   2     290      68                                                         168   -2.66   -0.45  1.0000
   3   4   2     316      69                                                         188   -2.66   -0.45  1.0000
   3   4   2     307      63                                                         181   -2.66   -0.45  1.0000
  -3   4  -2     332      75                                                         212    2.40    0.52  1.0000
  -3   4  -2     384      78                                                         254    2.40    0.52  1.0000
  -3   4  -2     232     102                                                         134    2.40    0.52  1.0000
  -4  -4  -2    8764     288                                                        4635  -16.73    0.43  1.0000
   4  -4   2    8805     297                                                        4684  -16.63    0.29  1.0000
   4  -4   2    8976     287                                                        4809  -16.63    0.29  1.0000
  -4  -4  -2    8606     279                                                        4520  -16.73    0.43  1.0000
  -4   4  -2    8676     366                                                        4584  -16.63   -0.29  1.0000
   4   4   2    8705     319                                                        4583  -16.73   -0.43  1.0000
   4   4   2    8800     308                                                        4652  -16.73   -0.43  1.0000
  -4   4  -2    8659     308                                                        4572  -16.63   -0.29  1.0000
  -4   4  -2    8899     318                                                        4747  -16.63   -0.29  1.0000
   4   4   2    8562     324                                                        4480  -16.73   -0.43  1.0000
   6  -4   2    8102     562                                                        9653    5.37    0.51  1.0000
   6  -4   2    8072     541                                                        9620    5.37    0.51  1.0000
  -6  -4  -2    7798     550                                                        9288    5.29   -0.22  1.0000
   6  -4   2    7202     666                                                        8668    5.37    0.51  1.0000
  -6  -4  -2    7720     533                                                        9203    5.29   -0.22  1.0000
   6   4   2    7987     571                                                        9500    5.29    0.22  1.0000
   6   4   2    7738     588                                                        9228    5.29    0.22  1.0000
  -6   4  -2    8251     586                                                        9802    5.37   -0.51  1.0000
   6   4   2    7154     602                                                        8589    5.29    0.22  1.0000
  -6   4  -2    7928     566                                                        9450    5.37   -0.51  1.0000
   7  -4   2    2533     184                                                        2238    1.98    0.19  1.0000
  -7   4   2    2521     213                                                        2424    0.64    0.09  1.0000
   7   4  -2    2325     197                                                        2251   -0.52    0.41  1.0000
   7   4  -2    2219     205                                                        2147   -0.52    0.41  1.0000
   7   4  -2    2447     208                                                        2371   -0.52    0.41  1.0000
  -7   4   2    2312     197                                                        2219    0.64    0.09  1.0000
  -7  -4  -2    2368     182                                                        2099   -1.86   -0.03  1.0000
   7  -4   2    2389     175                                                        2103    1.98    0.19  1.0000
   7  -4   2    2500     272                                                        2207    1.98    0.19  1.0000
  -7  -4  -2    2196     181                                                        1938   -1.86   -0.03  1.0000
  -7   4  -2    2139     206                                                        1868    1.98   -0.19  1.0000
   7   4   2    2052     184                                                        1802   -1.86    0.03  1.0000
   7   4   2    2342     200                                                        2075   -1.86    0.03  1.0000
   7  -4  -2    2714     277                                                        2614    0.64   -0.09  1.0000
  -7   4  -2    2204     214                                                        1929    1.98   -0.19  1.0000
   7   4   2    2165     198                                                        1908   -1.86    0.03  1.0000
   7  -4  -2    2418     159                                                        2323    0.64   -0.09  1.0000
  -9   4  -2    1094     201                                                        1343    2.33    0.03  1.0000
   9   4   2    1036     182                                                        1275   -2.31    0.10  1.0000
  -9   4  -2    1080     191                                                        1327    2.33    0.03  1.0000
  10  -4   2    1086     278                                                        1336   -2.35    0.10  1.0000
  10   4   2     967     193                                                        1205   -2.37    0.04  1.0000
 -10   4  -2    1329     230                                                        1604   -2.35   -0.10  1.0000
 -10   4  -2    1146     219                                                        1402   -2.35   -0.10  1.0000
  10   4   2     719     182                                                         926   -2.37    0.04  1.0000
 -11   4   2     592     157                                                         563    0.39   -0.16  1.0000
 -11   4   2     389     147                                                         366    0.39   -0.16  1.0000
  11  -4   2      82     195                                                         237   -4.14    0.04  1.0000
  11   4  -2     746     164                                                         709   -0.45   -0.31  1.0000
  11   4  -2     437     132                                                         409   -0.45   -0.31  1.0000
  11   4  -2     404     146                                                         377   -0.45   -0.31  1.0000
  11   4   2     217     159                                                         445    4.17    0.05  1.0000
  11  -4  -2     485     189                                                         459    0.39    0.16  1.0000
  11   4   2     238     156                                                         476    4.17    0.05  1.0000
 -11   4  -2     242     172                                                         479   -4.14   -0.04  1.0000
 -11   4  -2     212     163                                                         436   -4.14   -0.04  1.0000
  12   4  -2     480     174                                                         641    2.22    0.11  1.0000
  12   4  -2     727     185                                                         922    2.22    0.11  1.0000
  12   4  -2     574     179                                                         749    2.22    0.11  1.0000
 -12   4   2     811     199                                                        1015    2.22    0.04  1.0000
 -12   4   2     491     181                                                         653    2.22    0.04  1.0000
  12  -4  -2     611     244                                                         789    2.22   -0.04  1.0000
  13  -4   2     260     208                                                         406    2.63   -0.02  1.0000
 -13   4   2     785     196                                                         815    0.34   -0.04  1.0000
  13   4  -2     721     188                                                         746   -0.30    0.04  1.0000
  13   4  -2     802     190                                                         828   -0.30    0.04  1.0000
 -13   4   2     827     201                                                         857    0.34   -0.04  1.0000
  13   4  -2     672     178                                                         696   -0.30    0.04  1.0000
 -13   4  -2     329     187                                                         491    2.63    0.02  1.0000
  13  -4  -2     715     233                                                         743    0.34    0.04  1.0000
 -13   4  -2     182     195                                                         307    2.63    0.02  1.0000
  13   4   2     190     174                                                         319   -2.65   -0.20  1.0000
 -14   4   2    1254     255                                                        1501    2.19   -0.04  1.0000
  14   4  -2    1391     268                                                        1652    2.20   -0.08  1.0000
 -14   4   2     968     247                                                        1187    2.19   -0.04  1.0000
  14   4  -2    1369     254                                                        1628    2.20   -0.08  1.0000
  14  -4   2    2213     316                                                        2032    1.29   -0.06  1.0000
  14  -4  -2    1005     290                                                        1228    2.19    0.04  1.0000
 -14   4  -2    2068     304                                                        1893    1.29    0.06  1.0000
  14   4   2    2228     298                                                        2043    1.30    0.10  1.0000
  14   4   2    2345     294                                                        2155    1.30    0.10  1.0000
 -14   4  -2    2223     294                                                        2041    1.29    0.06  1.0000
  15   4  -2      18     153                                                         130    4.74    0.13  1.0000
  15   4   2     204     179                                                         154   -1.23   -0.02  1.0000
  15   4   2     307     186                                                         245   -1.23   -0.02  1.0000
  15  -4  -2      64     201                                                         228   -4.74    0.20  1.0000
 -15   4  -2     297     191                                                         234    1.26   -0.06  1.0000
  16   4   2     498     231                                                         461    0.55   -0.08  1.0000
   0   5   2    2317     268                                                        3469    7.04    0.01  1.0000
   0   5   2    2150     234                                                        3264    7.04    0.01  1.0000
   0   5   2    2080     224                                                        3178    7.04    0.01  1.0000
   0   5  -2    2187     224                                                        3306   -7.03    0.12  1.0000
   0   5  -2    2242     231                                                        3374   -7.03    0.12  1.0000
   0   5  -2    2028     232                                                        3111   -7.03    0.12  1.0000
   0   5  -2    2163     225                                                        3277   -7.03    0.12  1.0000
   0   5  -2    2591     299                                                        3799   -7.03    0.12  1.0000
  -1   5  -2    9415     441                                                        7523    6.74   -0.59  1.0000
   1   5   2    9700     437                                                        7843    6.50   -0.76  1.0000
   1   5   2    9218     449                                                        7411    6.50   -0.76  1.0000
   2  -5   2   10483     651                                                       10493   -0.03   -0.18  1.0000
  -2   5  -2   11474     661                                                       11482   -0.03    0.18  1.0000
  -2   5  -2   10941     623                                                       10949   -0.03    0.18  1.0000
   2   5   2   11483     673                                                       11516    0.10   -0.01  1.0000
  -2   5  -2   11402     640                                                       11410   -0.03    0.18  1.0000
   2   5   2   11703     728                                                       11736    0.10   -0.01  1.0000
[truncated: 2,568,749 more chars]
